# Supplementary material
Source: PubMed Central journal article supplement (PMC3630740)

# Design, Synthesis and Functional Activity of Labeled CD1d Glycolipid Agonists

*Peter J. Jervis,<sup>†‡#</sup> Paolo Polzella,<sup>§#</sup> Justyna Wojno,<sup>†‡§</sup> John-Paul Jukes,<sup>§</sup> Hemza Ghadbane,<sup>§</sup> Yoel R. Garcia Diaz,<sup>†‡f</sup> Gurdyal S. Besra,<sup>‡\*</sup> Vincenzo Cerundolo,<sup>§\*</sup> and Liam R. Cox<sup>†\*</sup>*

<sup>†</sup>School of Chemistry, University of Birmingham, Edgbaston, Birmingham, B15 2TT, U. K. <sup>‡</sup>School of Biosciences, University of Birmingham, Edgbaston, Birmingham, B15 2TT, U. K. <sup>§</sup>Medical Research Council Human Immunology Unit, Nuffield Department of Medicine, Weatherall Institute of Molecular Medicine, University of Oxford, Oxford, OX3 9DS, U. K.

<sup>#</sup>These authors contributed equally to this work

[vincenzo.cerundolo@imm.ox.ac.uk](mailto:vincenzo.cerundolo@imm.ox.ac.uk); [g.besra@bham.ac.uk](mailto:g.besra@bham.ac.uk); [l.r.cox@bham.ac.uk](mailto:l.r.cox@bham.ac.uk)

## Supporting Information II

Justyna Wojno - JW3-65

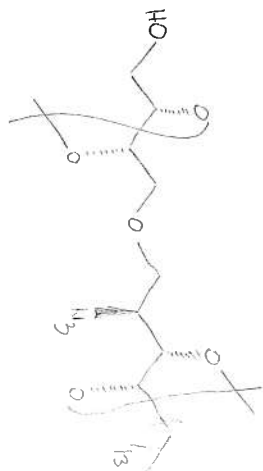

25, 300 MHz, CDCl<sub>3</sub>

NAME 08-18-Beazra-18  
EXPNO 10  
PROCNO 1  
Date\_ 20090818  
Time 12:04  
INSTRUM spect  
PROBHD 5 mm PABBO BB-  
PULPROG zg30  
TD 32768  
SOLVENT CDCl<sub>3</sub>  
NS 32  
DS 2  
SWMH 6009.615 Hz  
FIDRES 0.183399 Hz  
AQ 2.7263477 sec  
RG 512  
DWT 83.200 usec  
DE 13.19 usec  
TE 283.7 K  
D1 1.00000000 sec  
TD0 1

===== CHANNEL f1 =====  
NUC1 1H  
P1 12.80 usec  
PL1 1.00 dB  
PL1W 9.57725906 W  
SFO1 300.1318534 MHz  
SI 32768  
SF 300.1300055 MHz  
WDW EM  
SSB 0  
LB 0.30 Hz  
GB 0  
PC 1.00

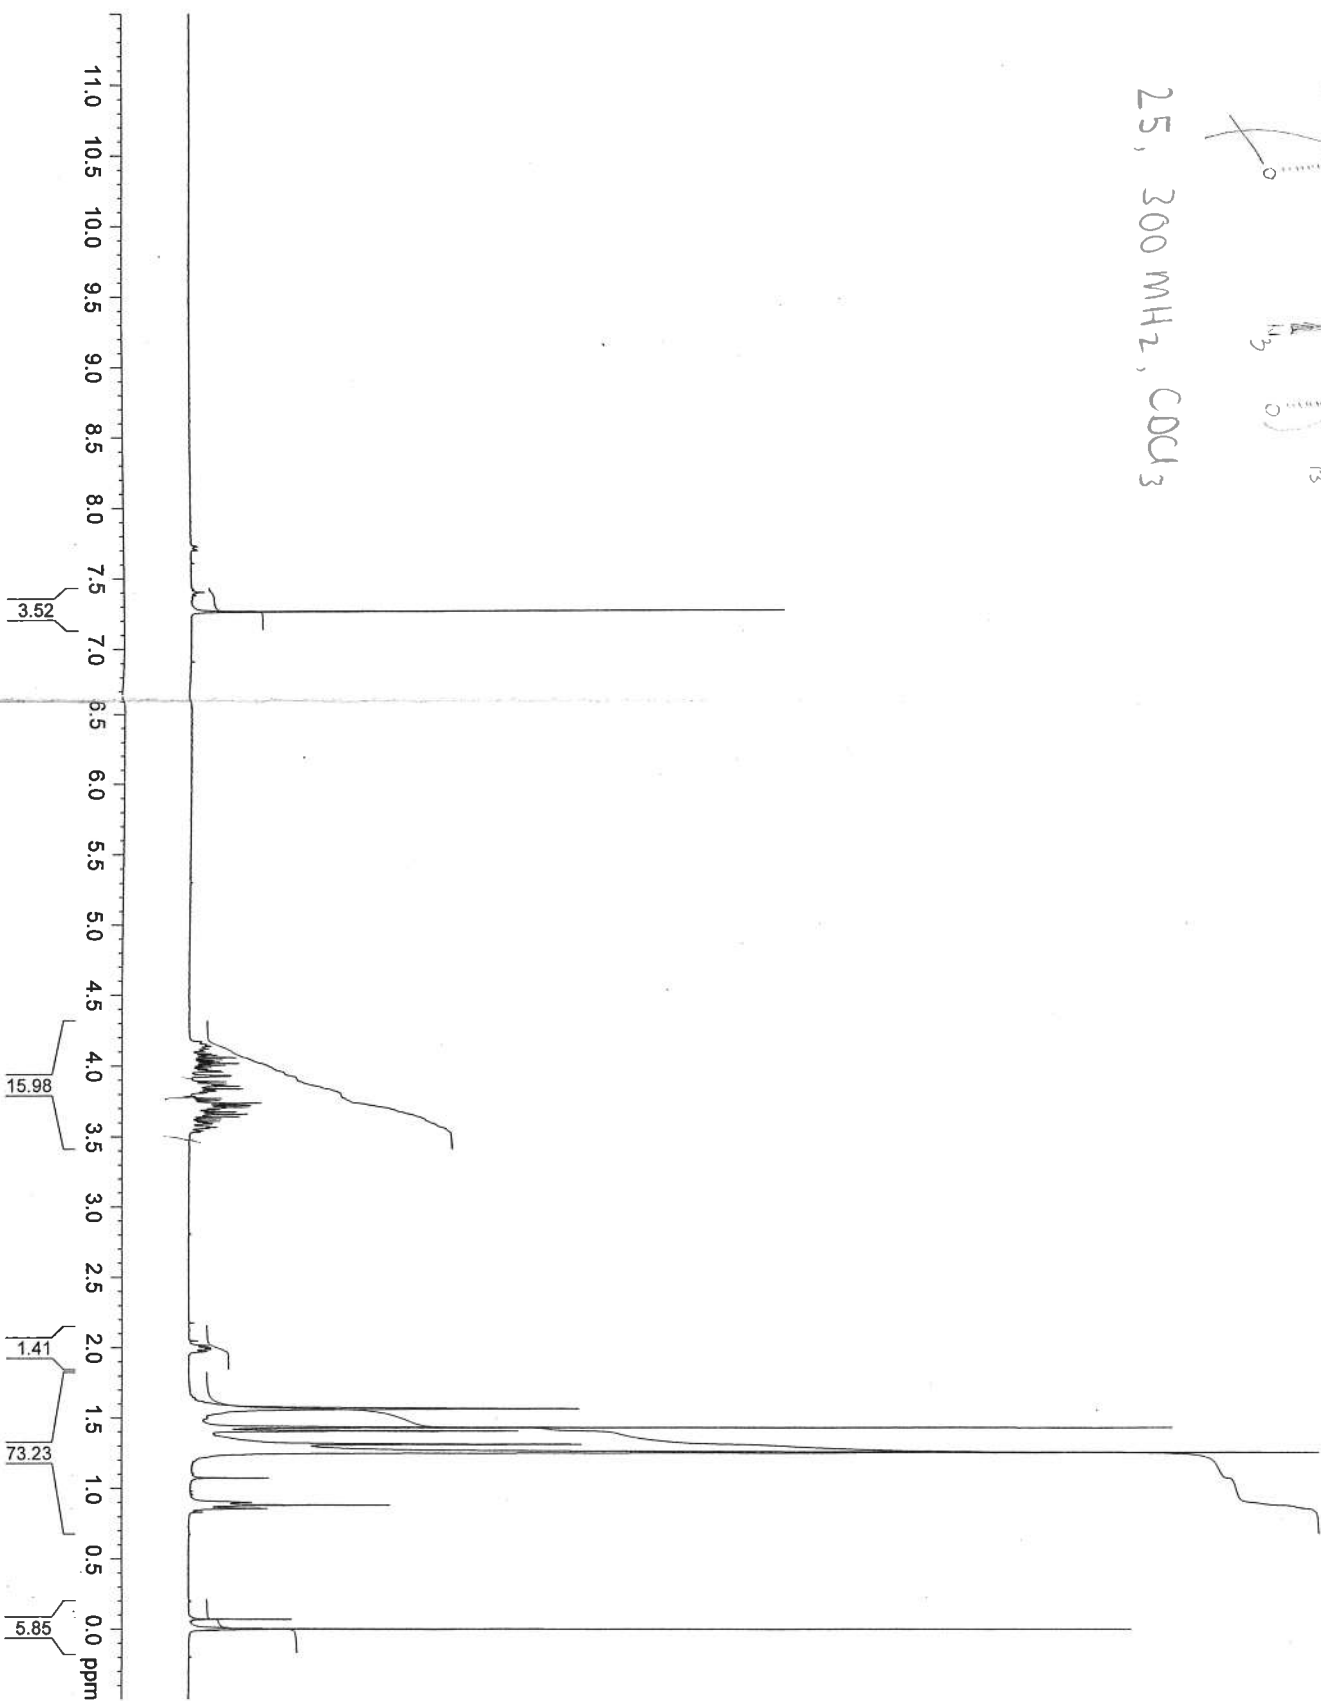

JustynaWojno - JW3-65

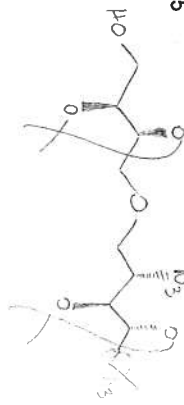

25, 100 MHz, CDCl<sub>3</sub>

- 134.8
- 129.6
- 127.7
  
- 109.4
- 108.3
  
- 79.4
- 77.8
- 77.4
- 77.0
- 76.7
- 76.0
- 75.6
- 72.9
- 71.9
- 62.3
- 59.9
  
- 31.9
- 29.7
- 29.6
- 29.4
- 29.4
- 28.1
- 27.0
- 27.0
- 26.4
- 25.6
- 22.7
- 14.1

NAME 08-18-Besra-4  
EXPNO 10  
PROCNO 1  
Date\_ 20090818  
Time 12:17  
INSTRUM spect  
PROBHD 5 mm PABUL 13C  
PULPROG zgpg30  
TD 65536  
SOLVENT CDCl<sub>3</sub>  
NS 512  
DS 4  
SWH 25252.525 Hz  
FIDRES 0.366323 Hz  
AQ 1.2876629 sec  
RG 2050  
DW 19.800 usec  
DE 19.800 usec  
TE 296.3 K  
CNST72 146.0000000  
CNST73 1.0000000  
CNST74 5.0000000  
D1 1.5000000 sec  
D2 0.00172414 sec  
D3 0.00437034 sec  
DT2 0.00002000 sec  
DT3 0.00009400 sec  
TD0 1

===== CHANNEL f1 =====  
NUC1 <sup>13</sup>C  
P1 8.80 usec  
PL1 -17.60 usec  
PL1W -3.00 dB  
SFO1 58.63890457 W  
SFO1 100.6233333 MHz

===== CHANNEL f2 =====  
CPDPRG2 waltz16  
NUC2 <sup>1</sup>H  
P3 9.70 usec  
P4 19.40 usec  
PCPD2 90.00 usec  
PL2 -4.00 dB  
PL12 15.35 dB  
PL2W 24.29165867 W  
PL12W 0.28213742 W  
SFO2 400.1316005 MHz  
SI 65536  
SE 100.6127690 MHz  
WDW EM  
SSB 0  
LB 4.00 Hz  
GB 0  
PC 1.00

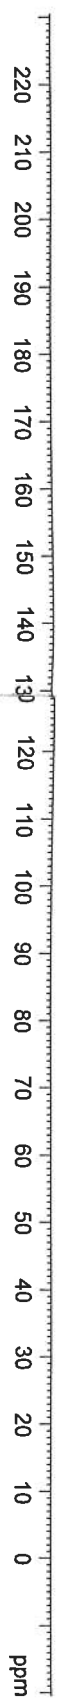

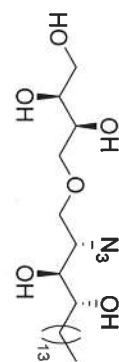

26, 300 MHz, CDCl<sub>3</sub>

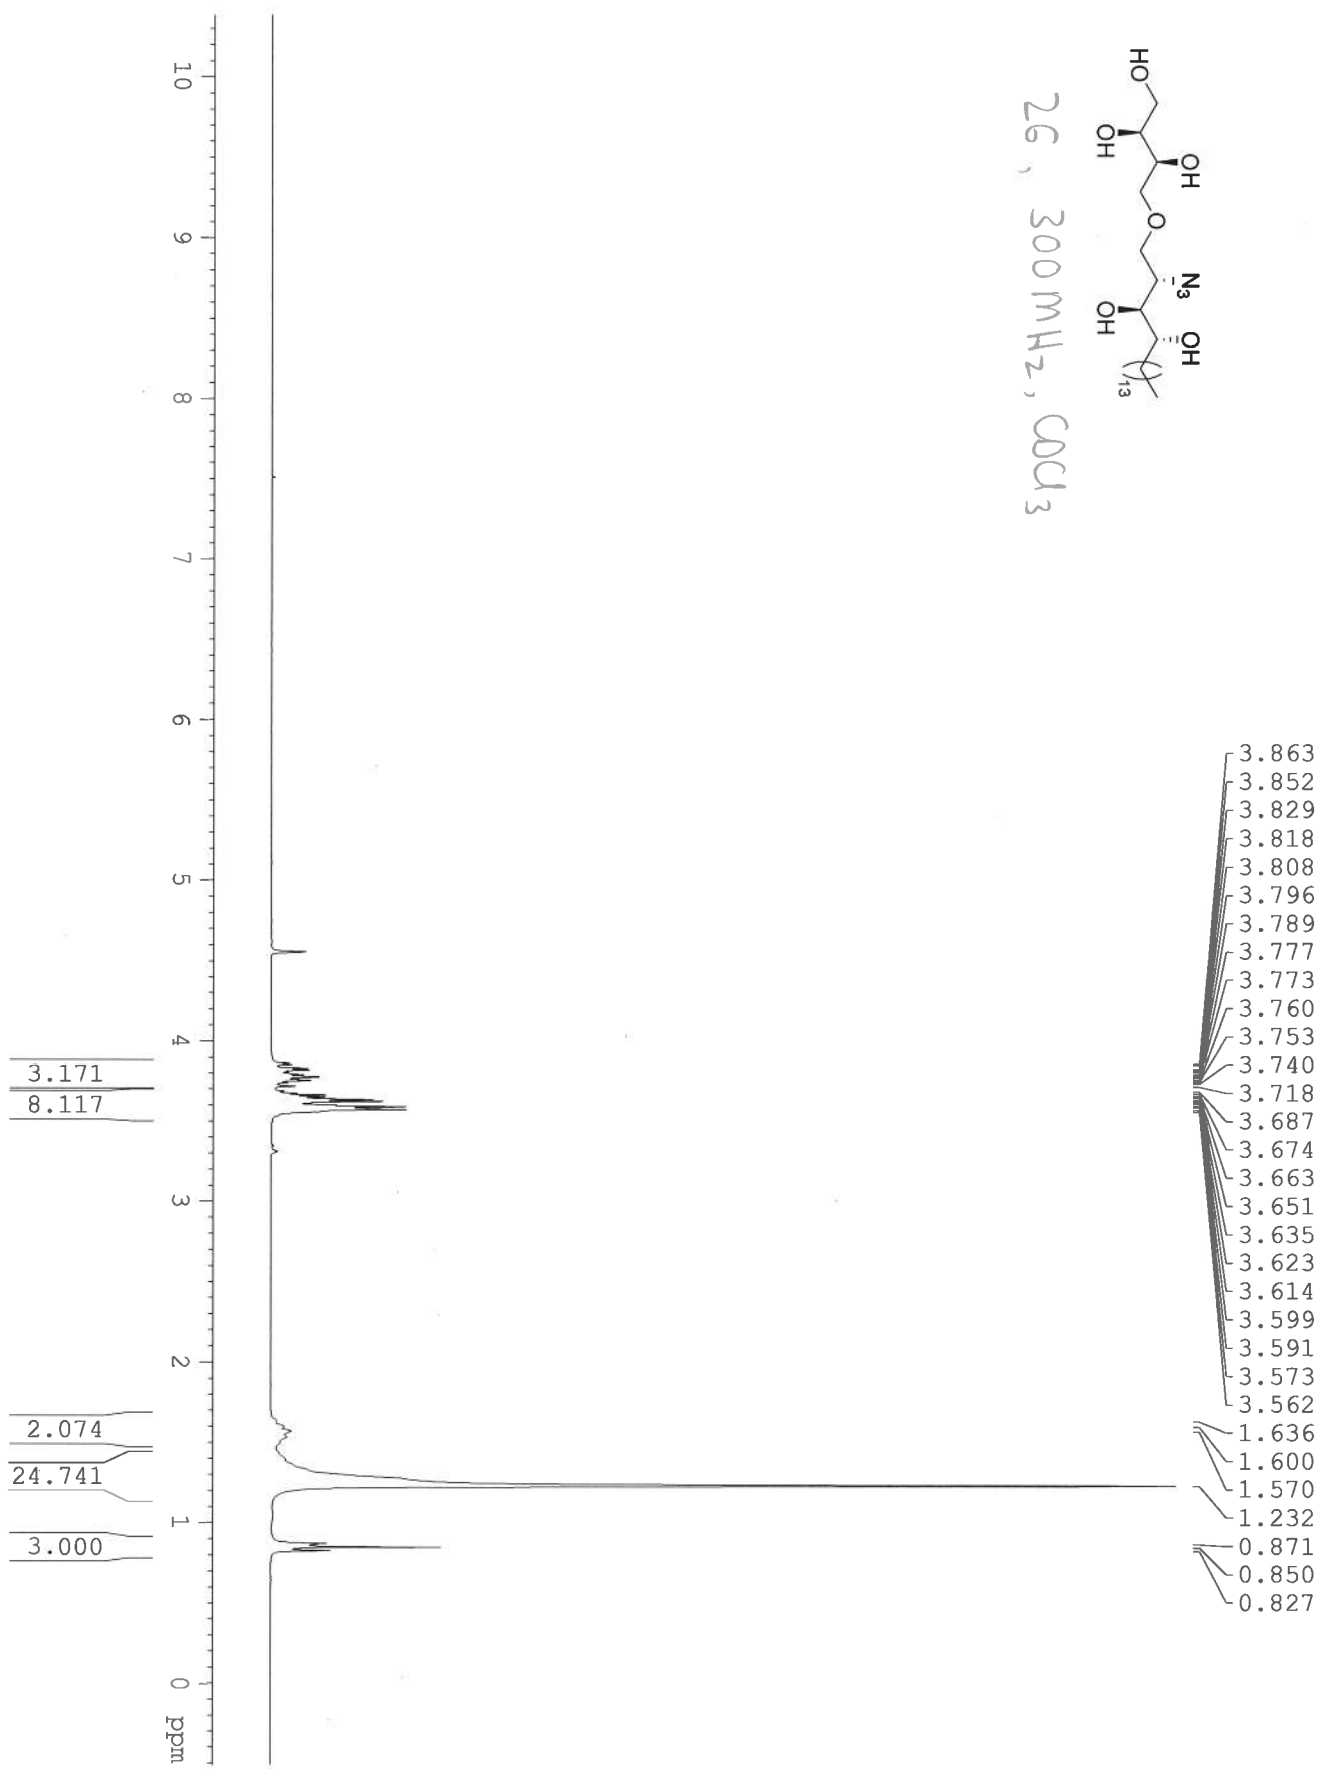

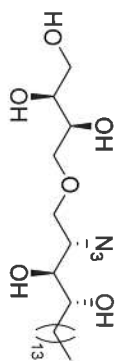

26, 100 MHz, CDCl<sub>3</sub>

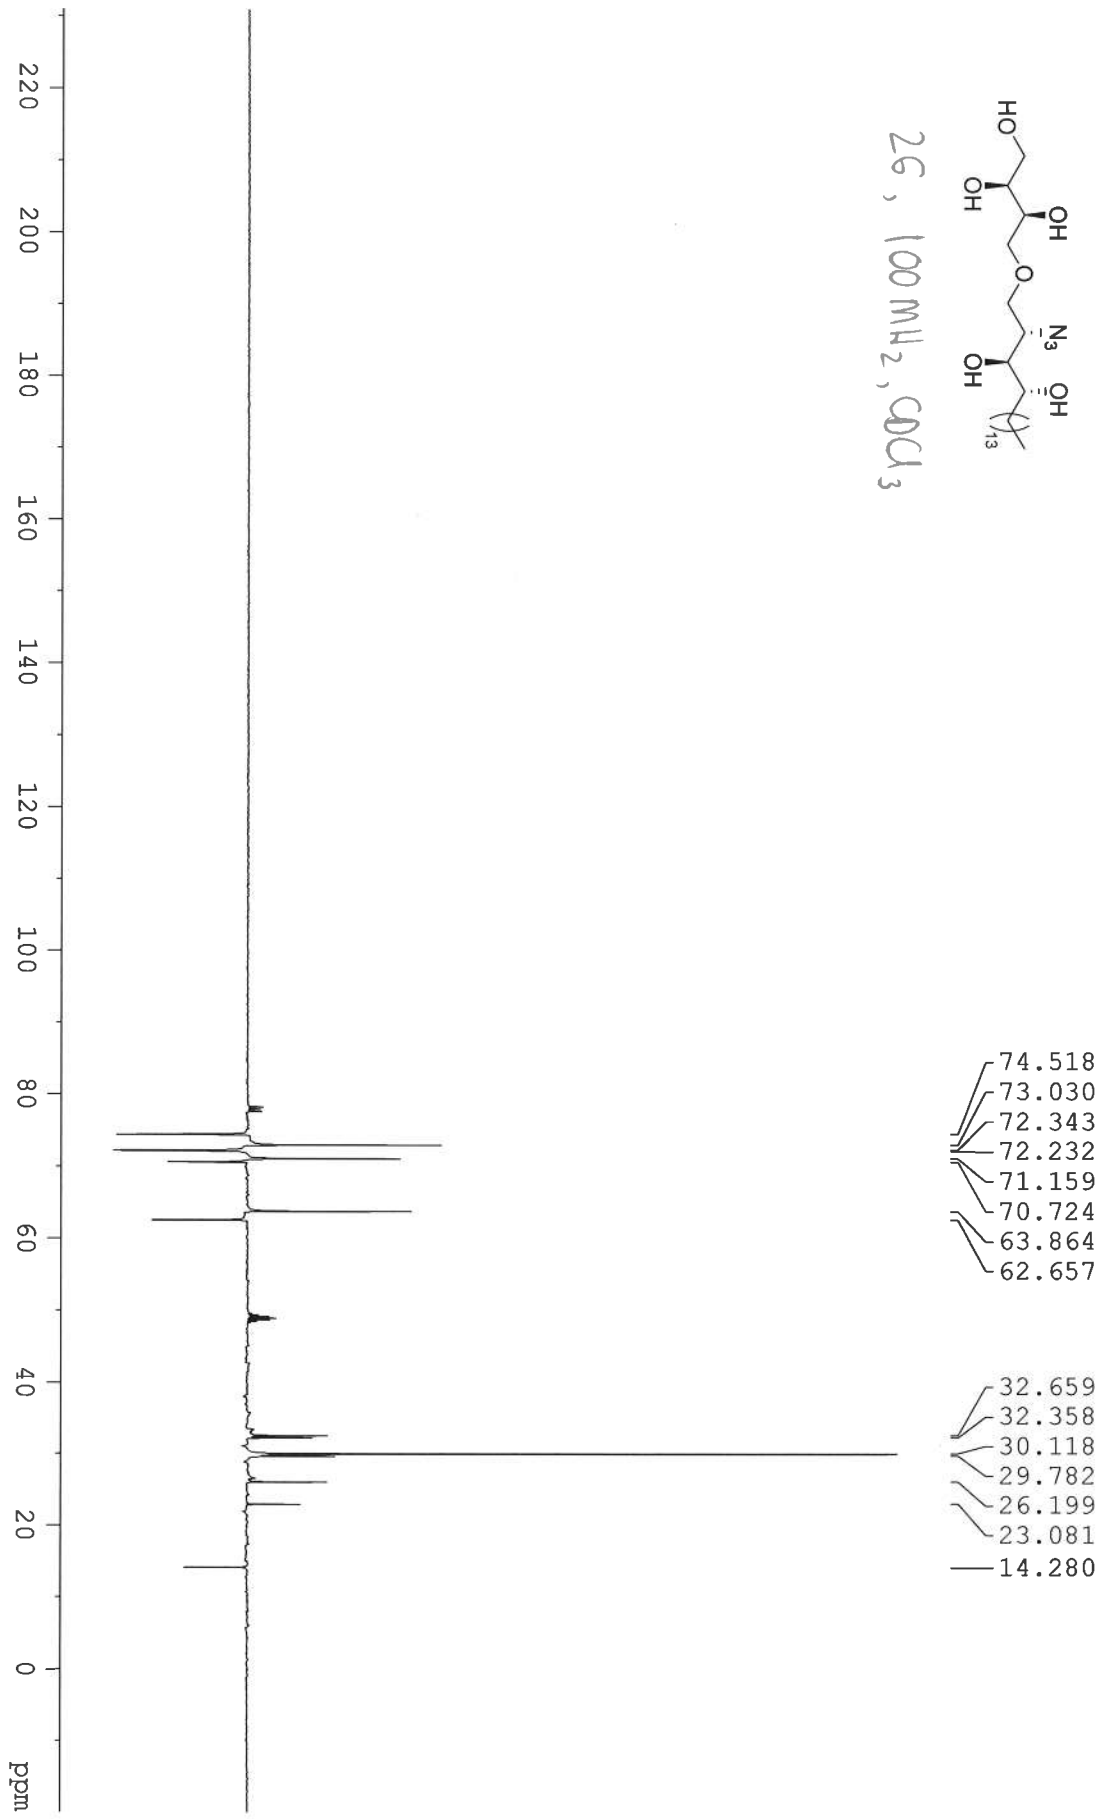

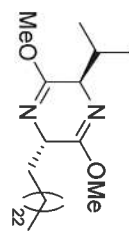

(major diastereoisomer)

13a, 300 MHz, CDCl<sub>3</sub>

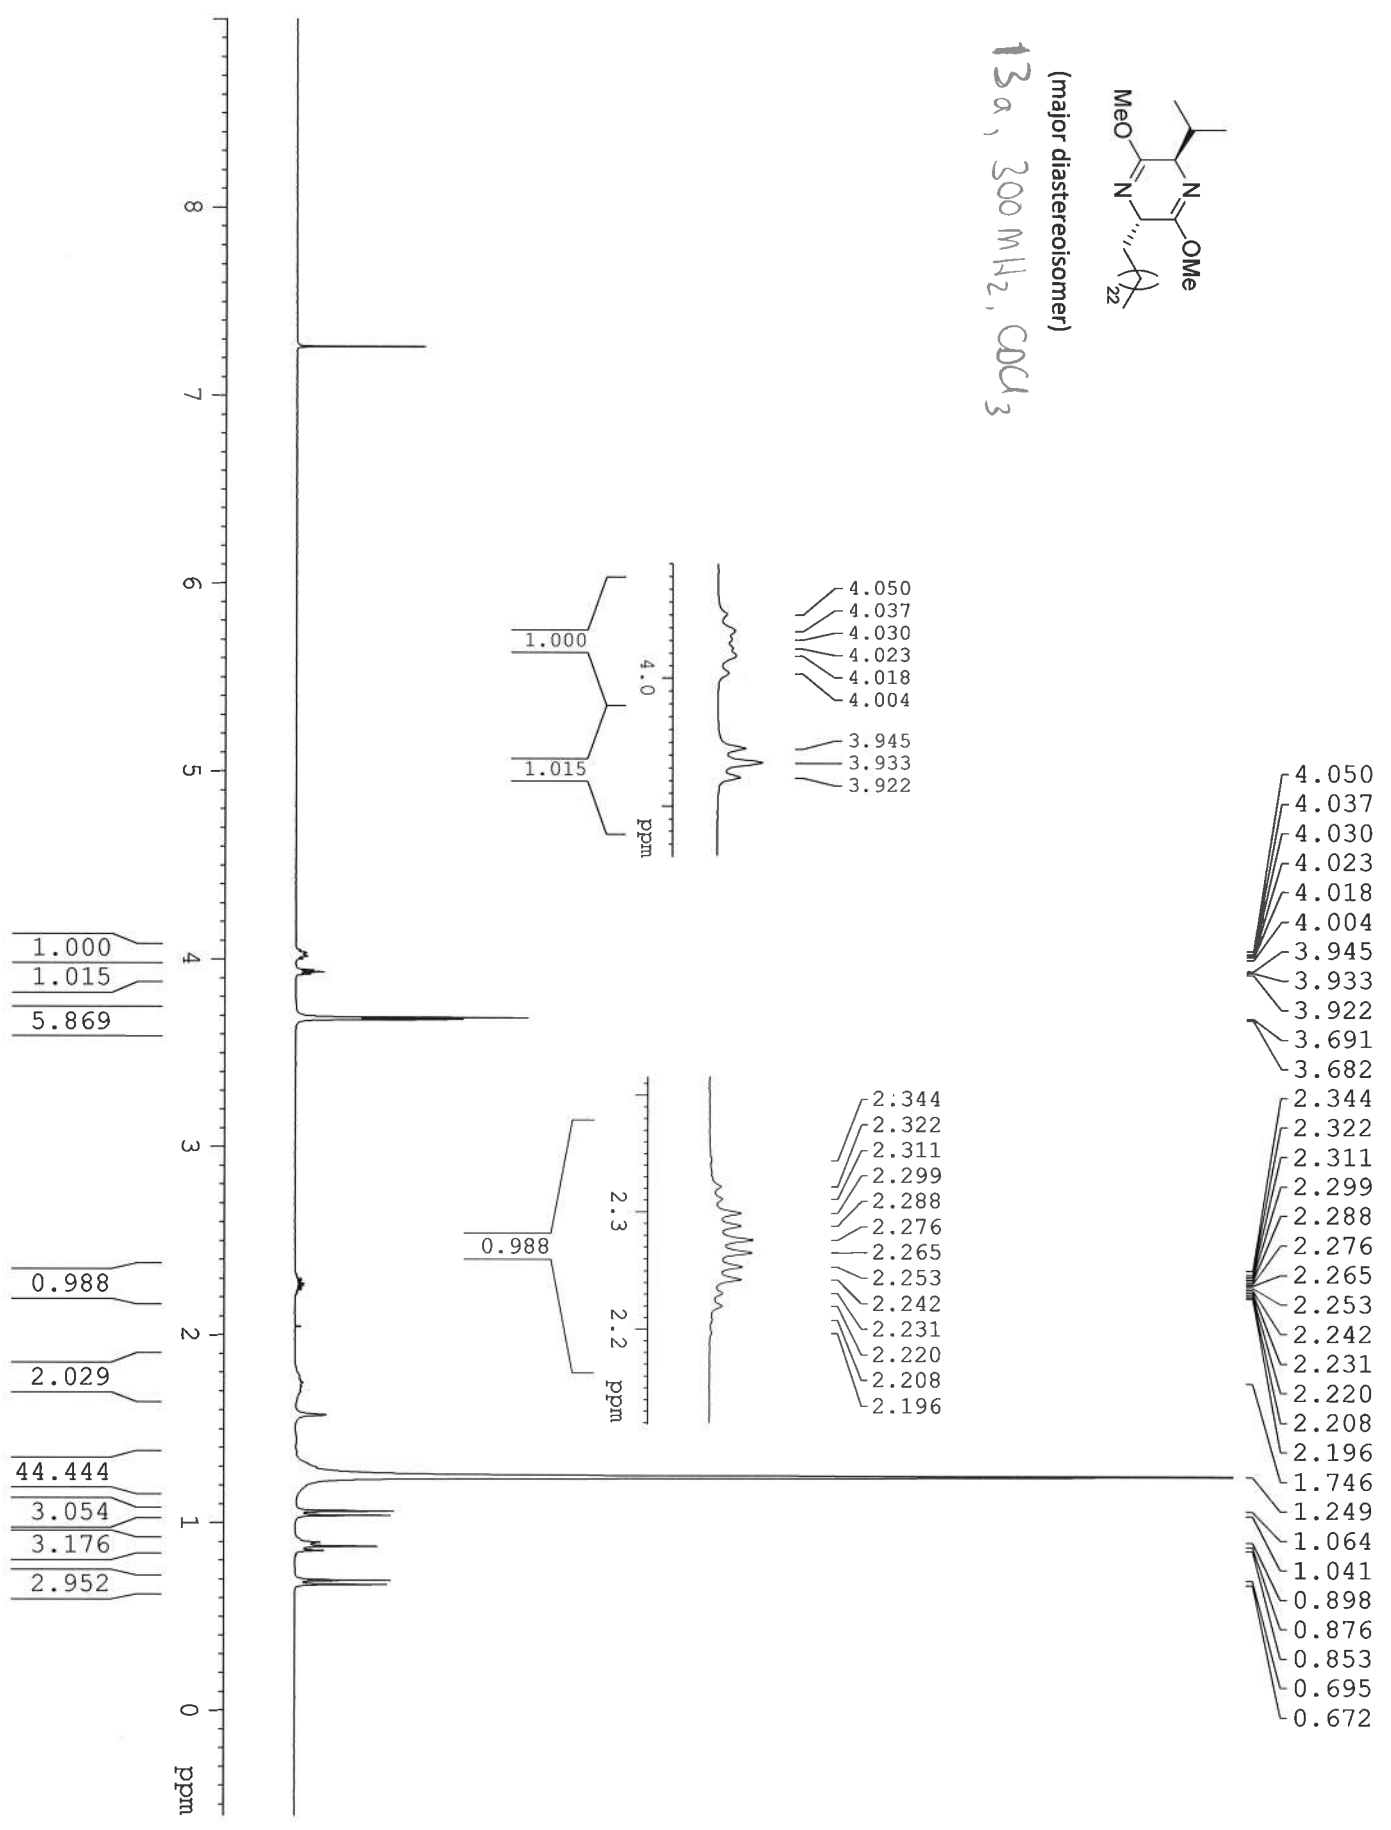

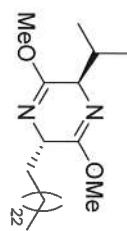

(major diastereoisomer)

13a, 100 MHz, CDCl<sub>3</sub>

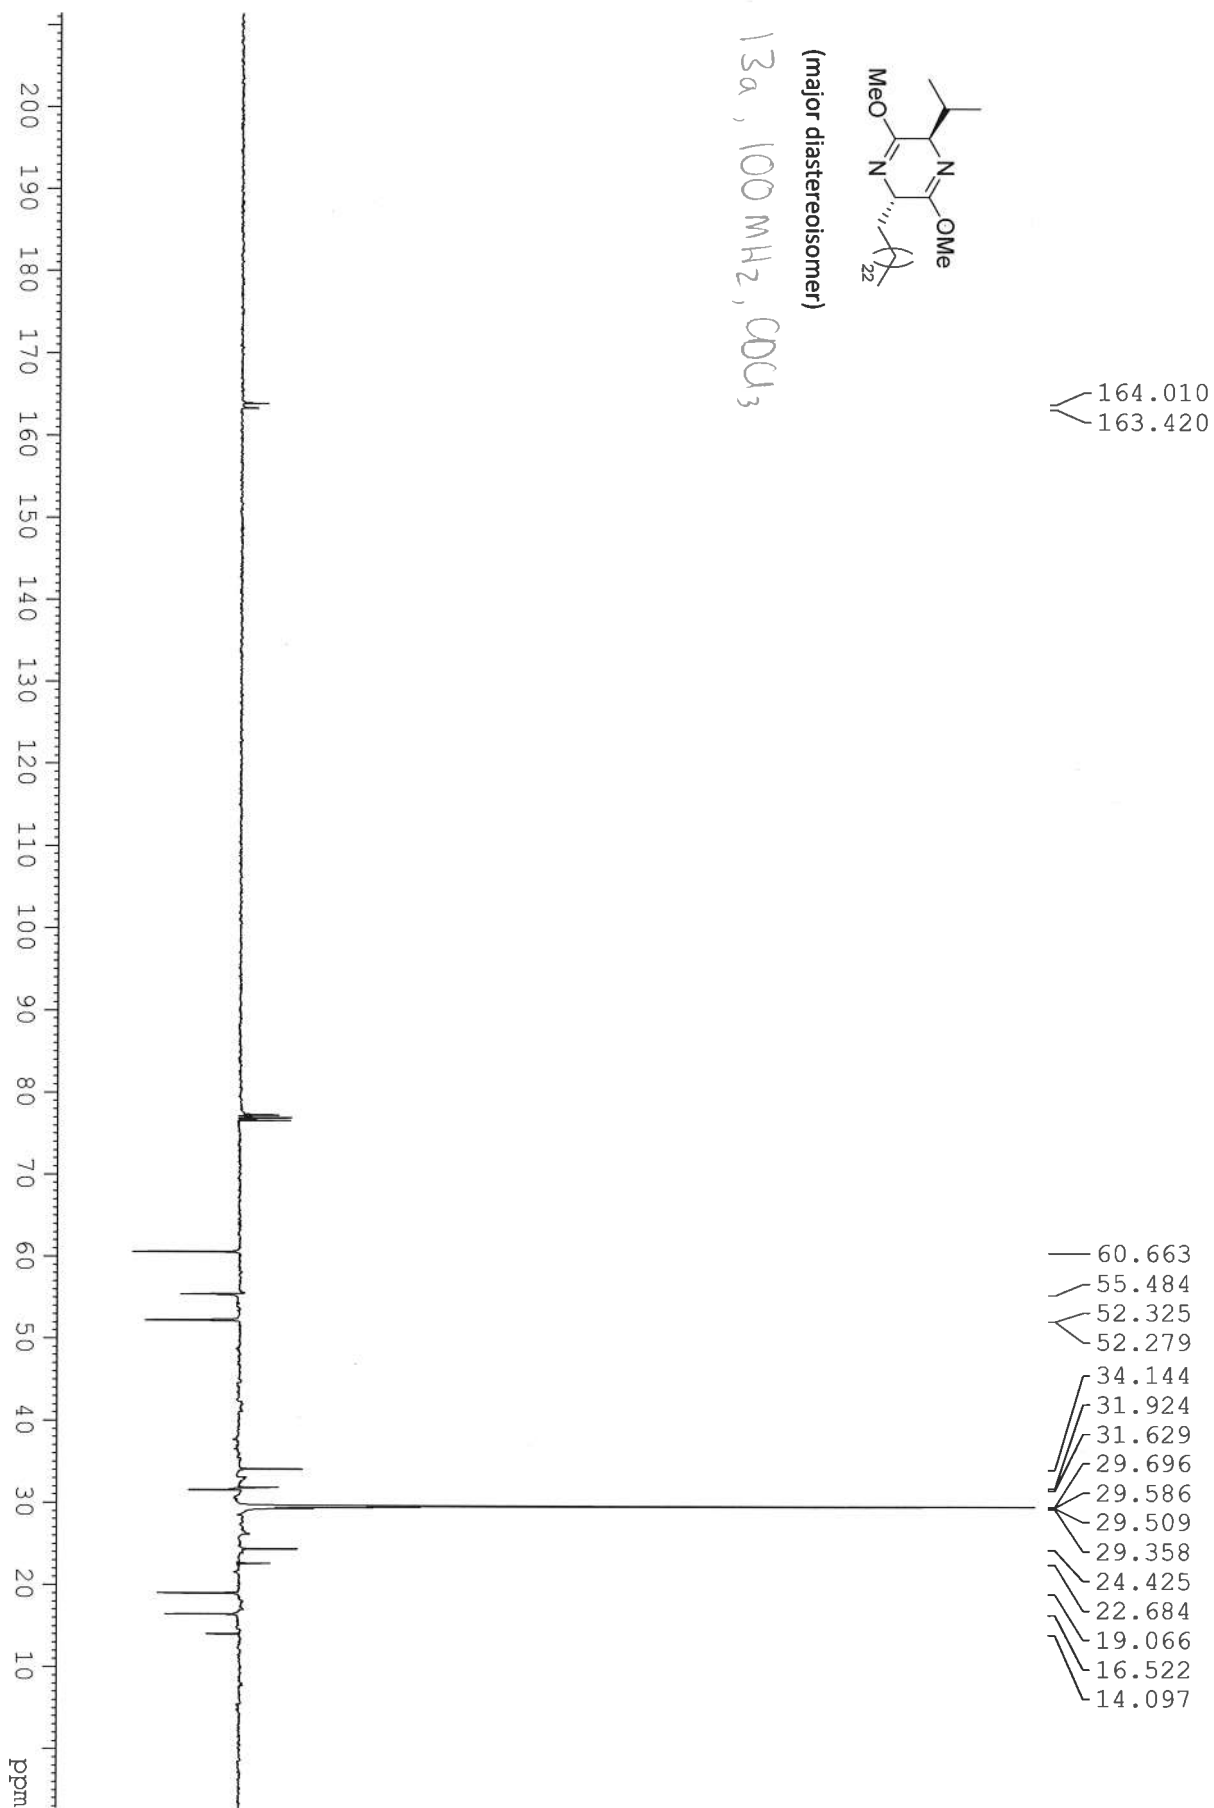

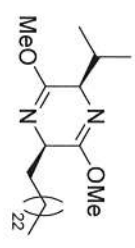

(minor diastereoisomer)

136, 300K, CDCl<sub>3</sub>

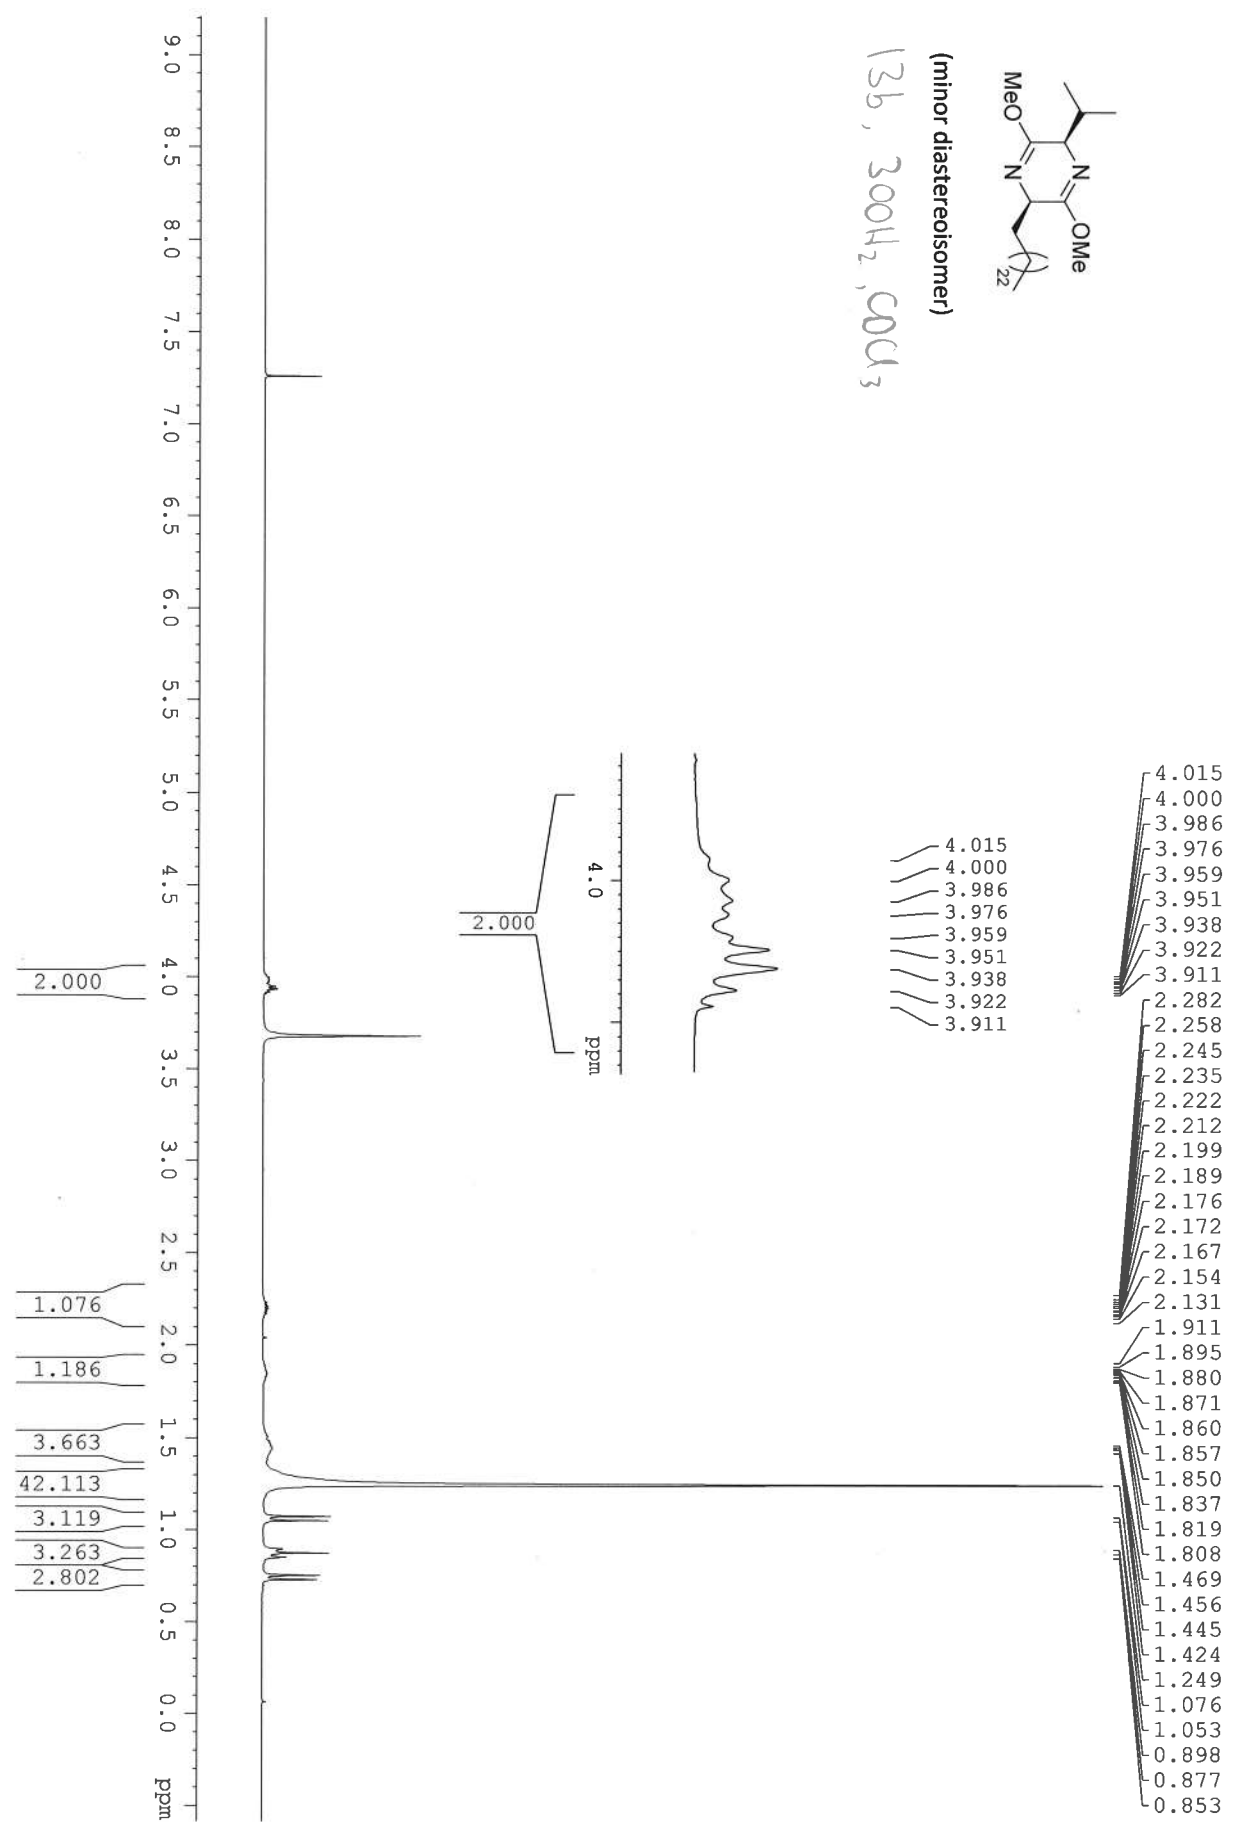



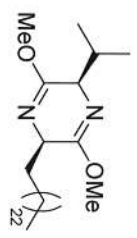

(minor diastereoisomer)  
13b, 100 MHz, CDCl<sub>3</sub>

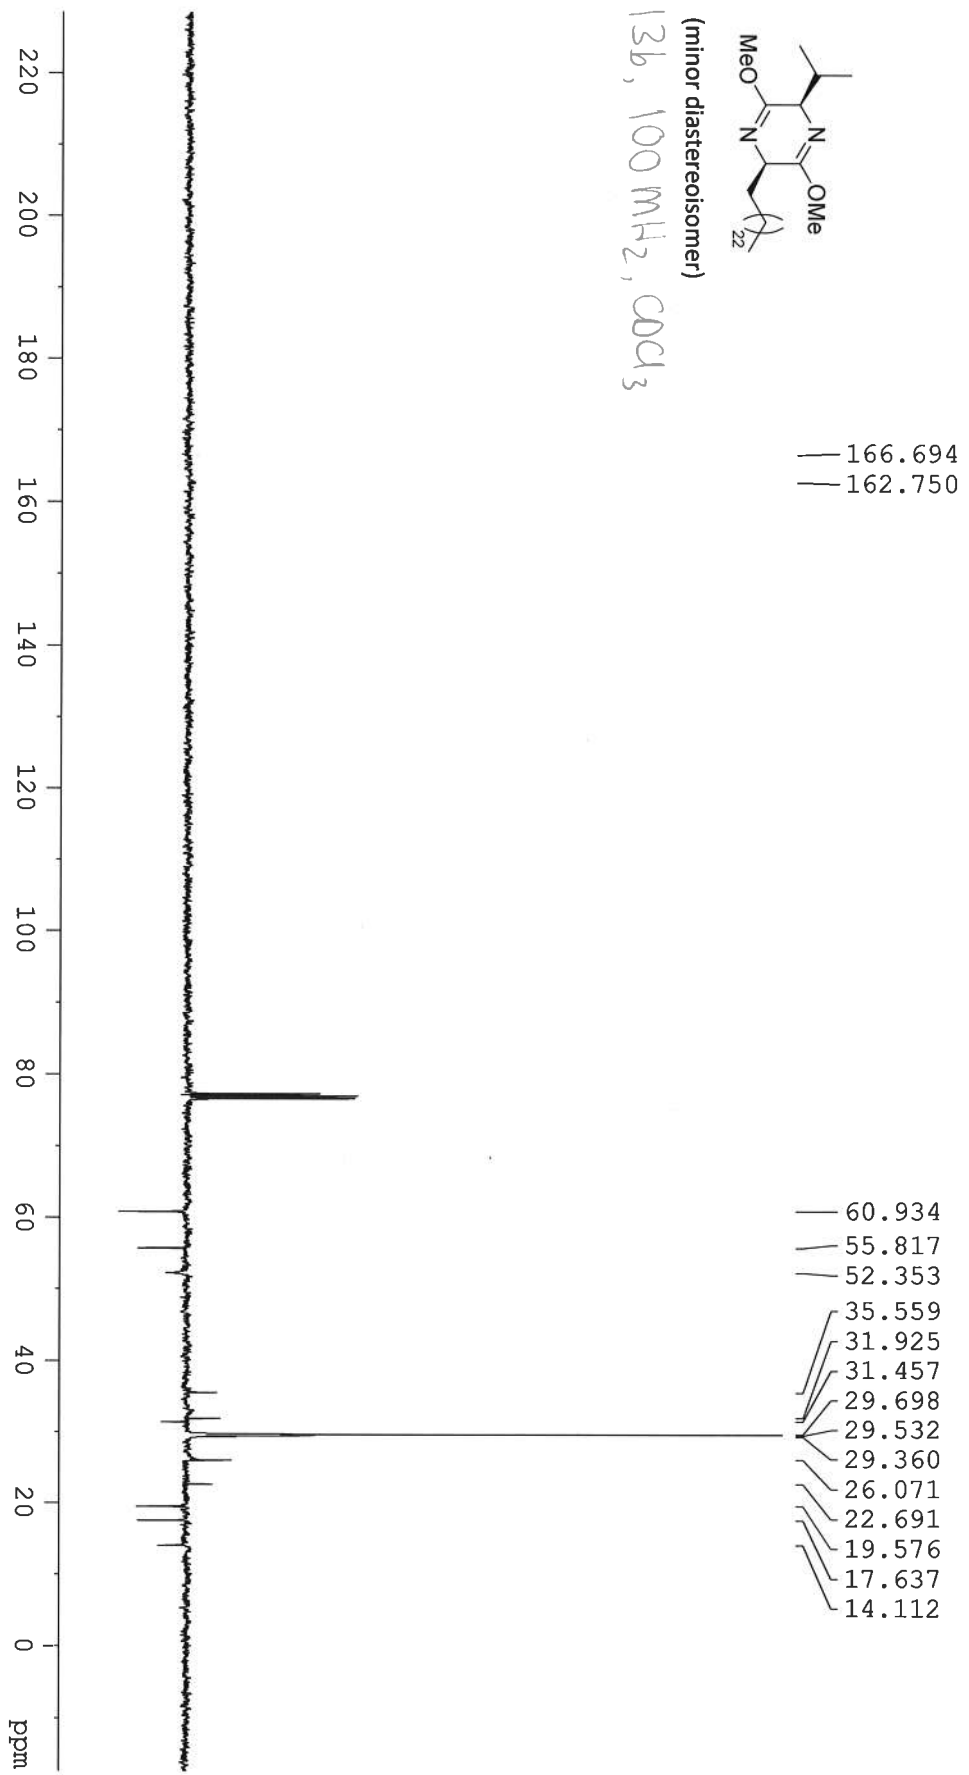

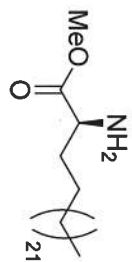

14, CDCl<sub>3</sub>, 100 MHz

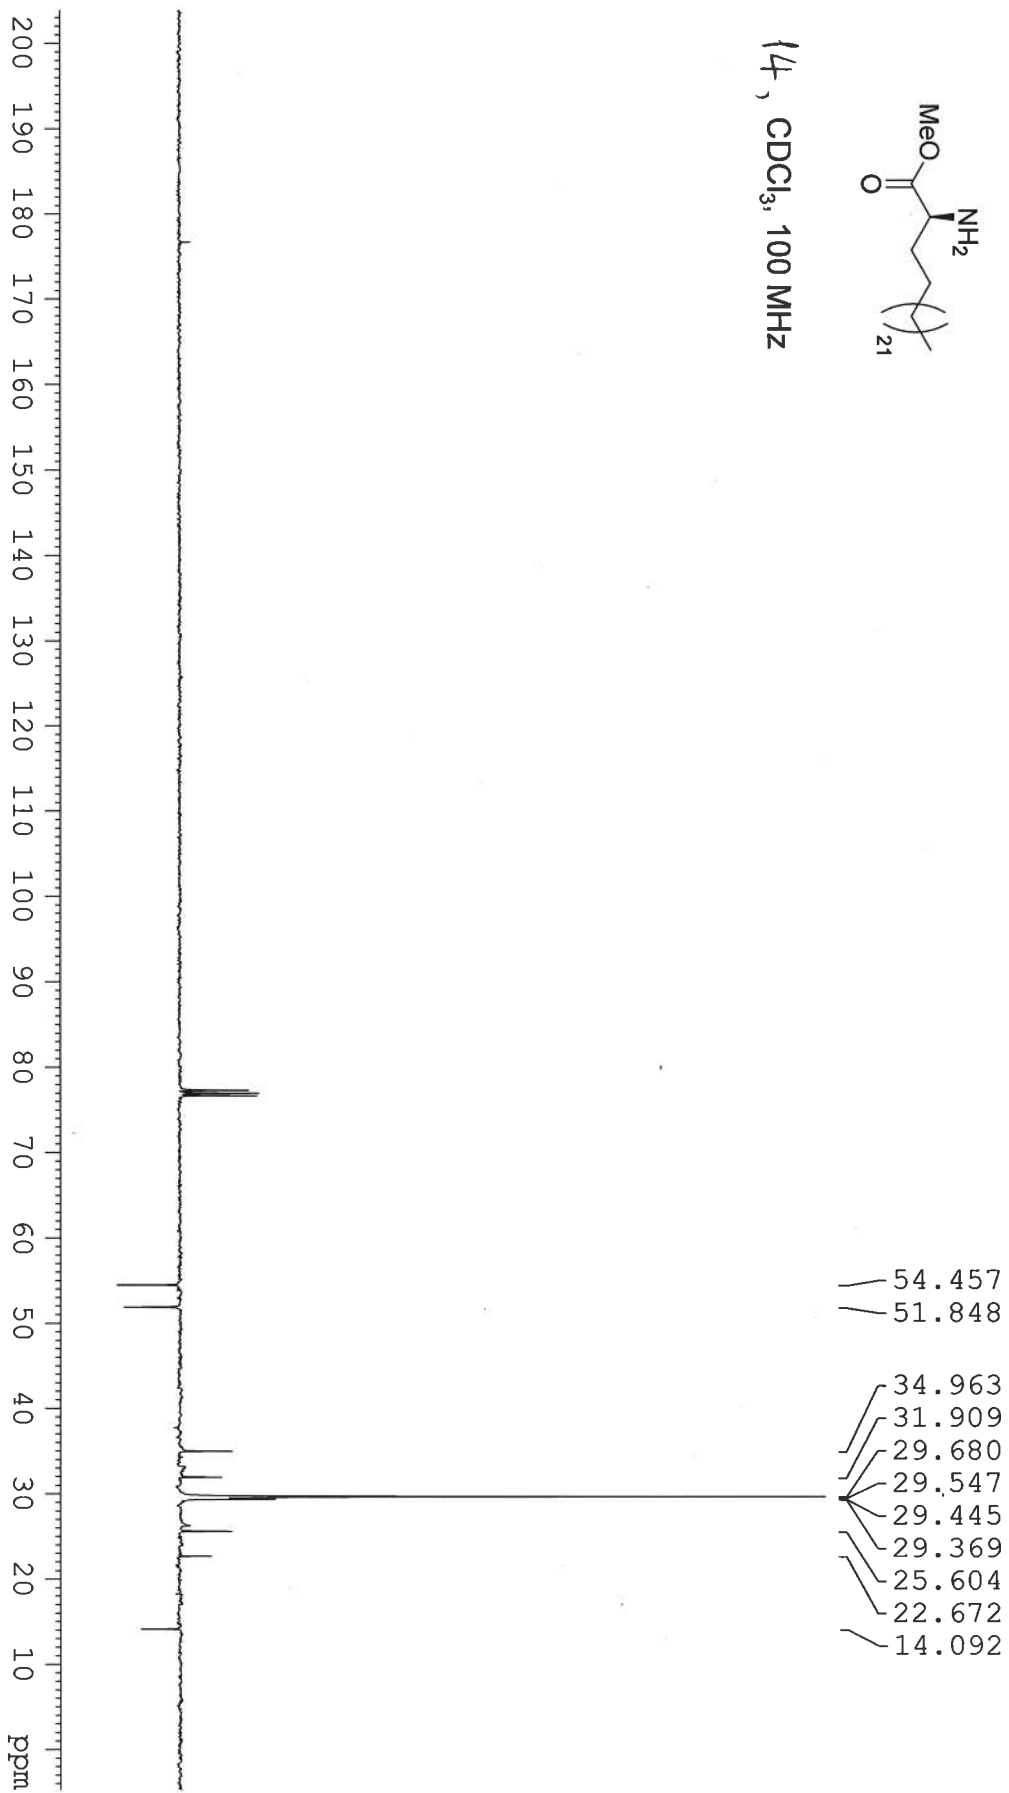

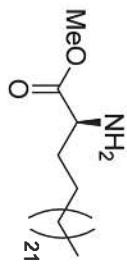

14, CDCl<sub>3</sub>, 300 MHz

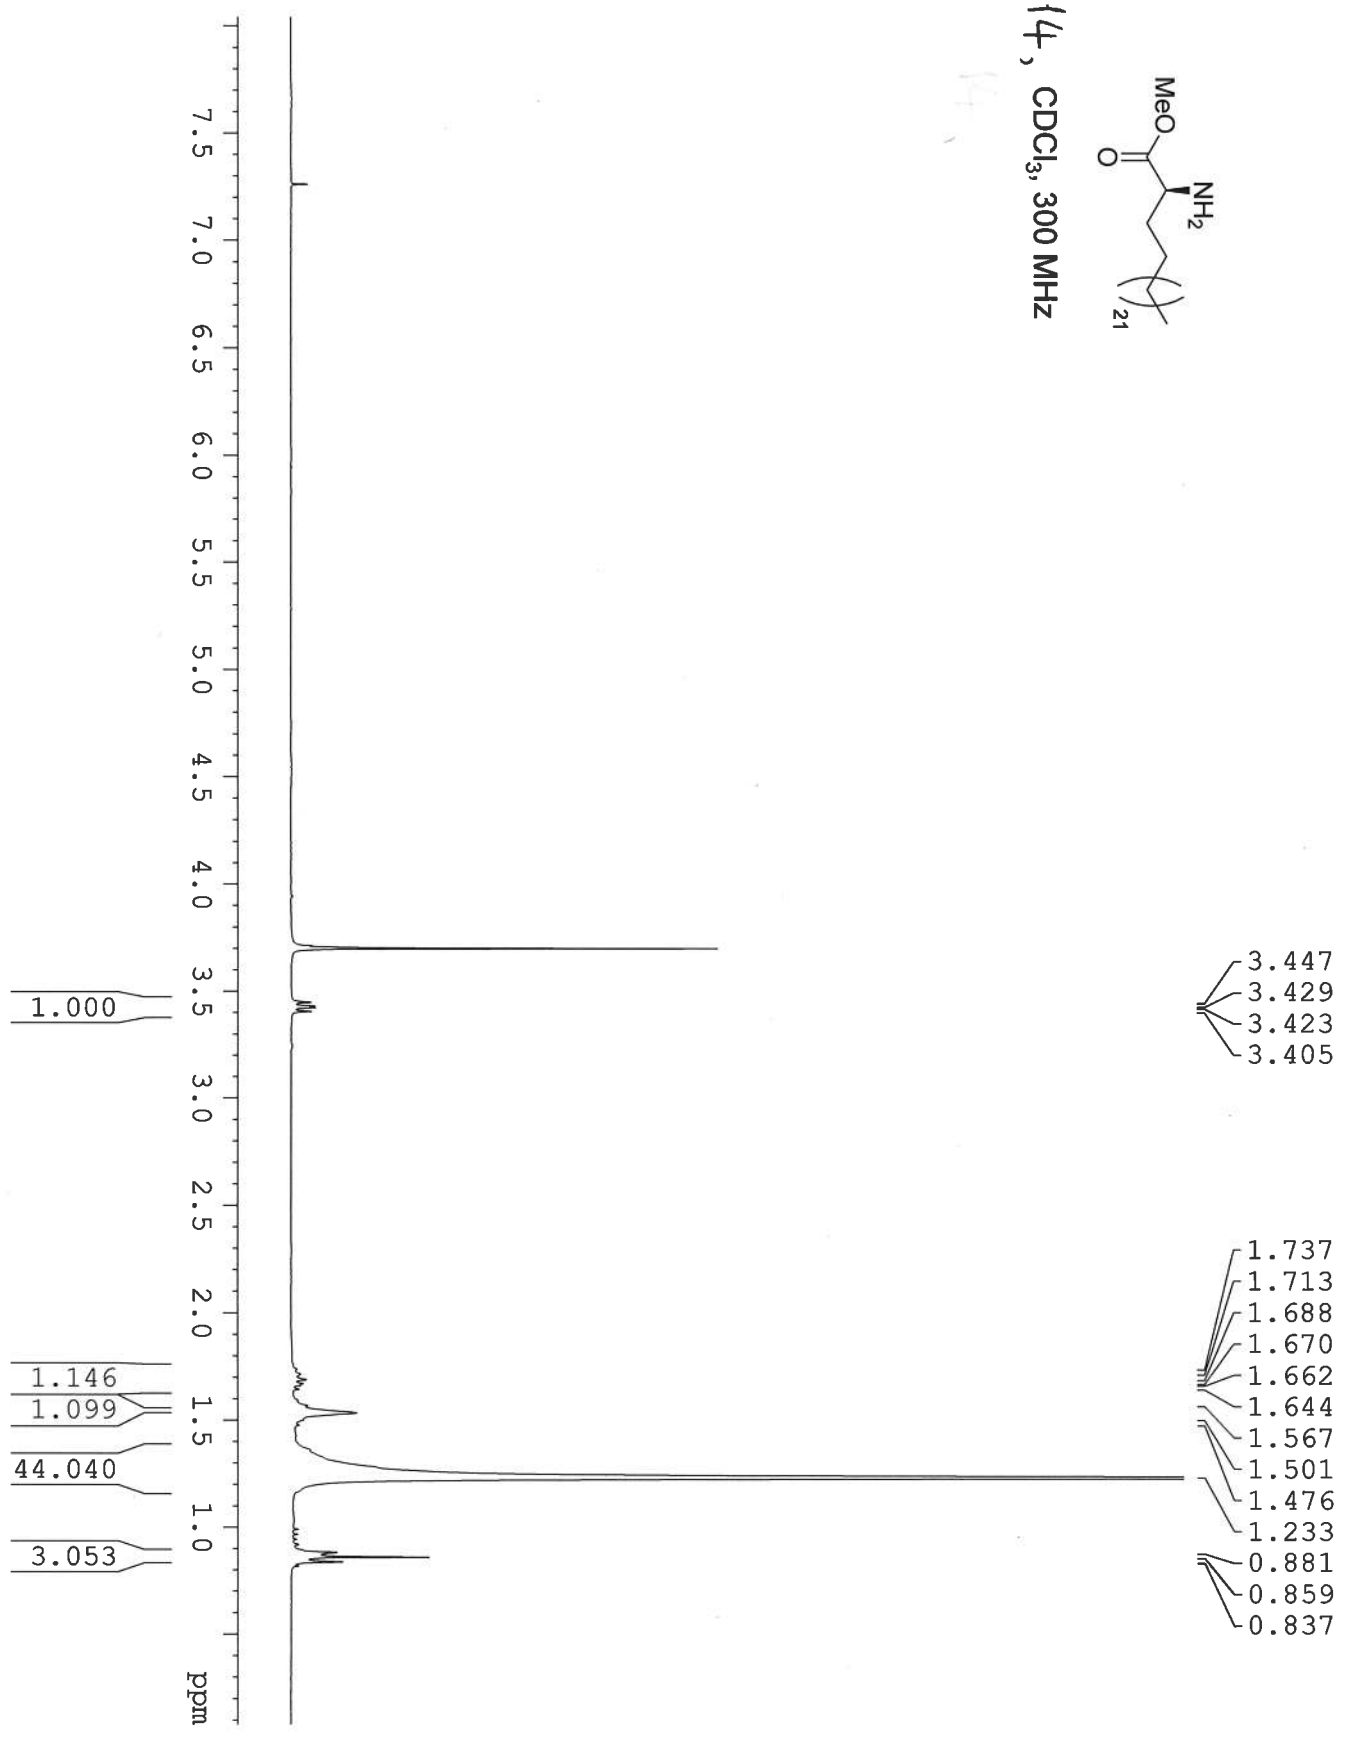

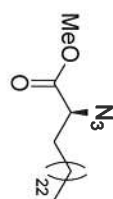

300 MHz, CDCl<sub>3</sub>

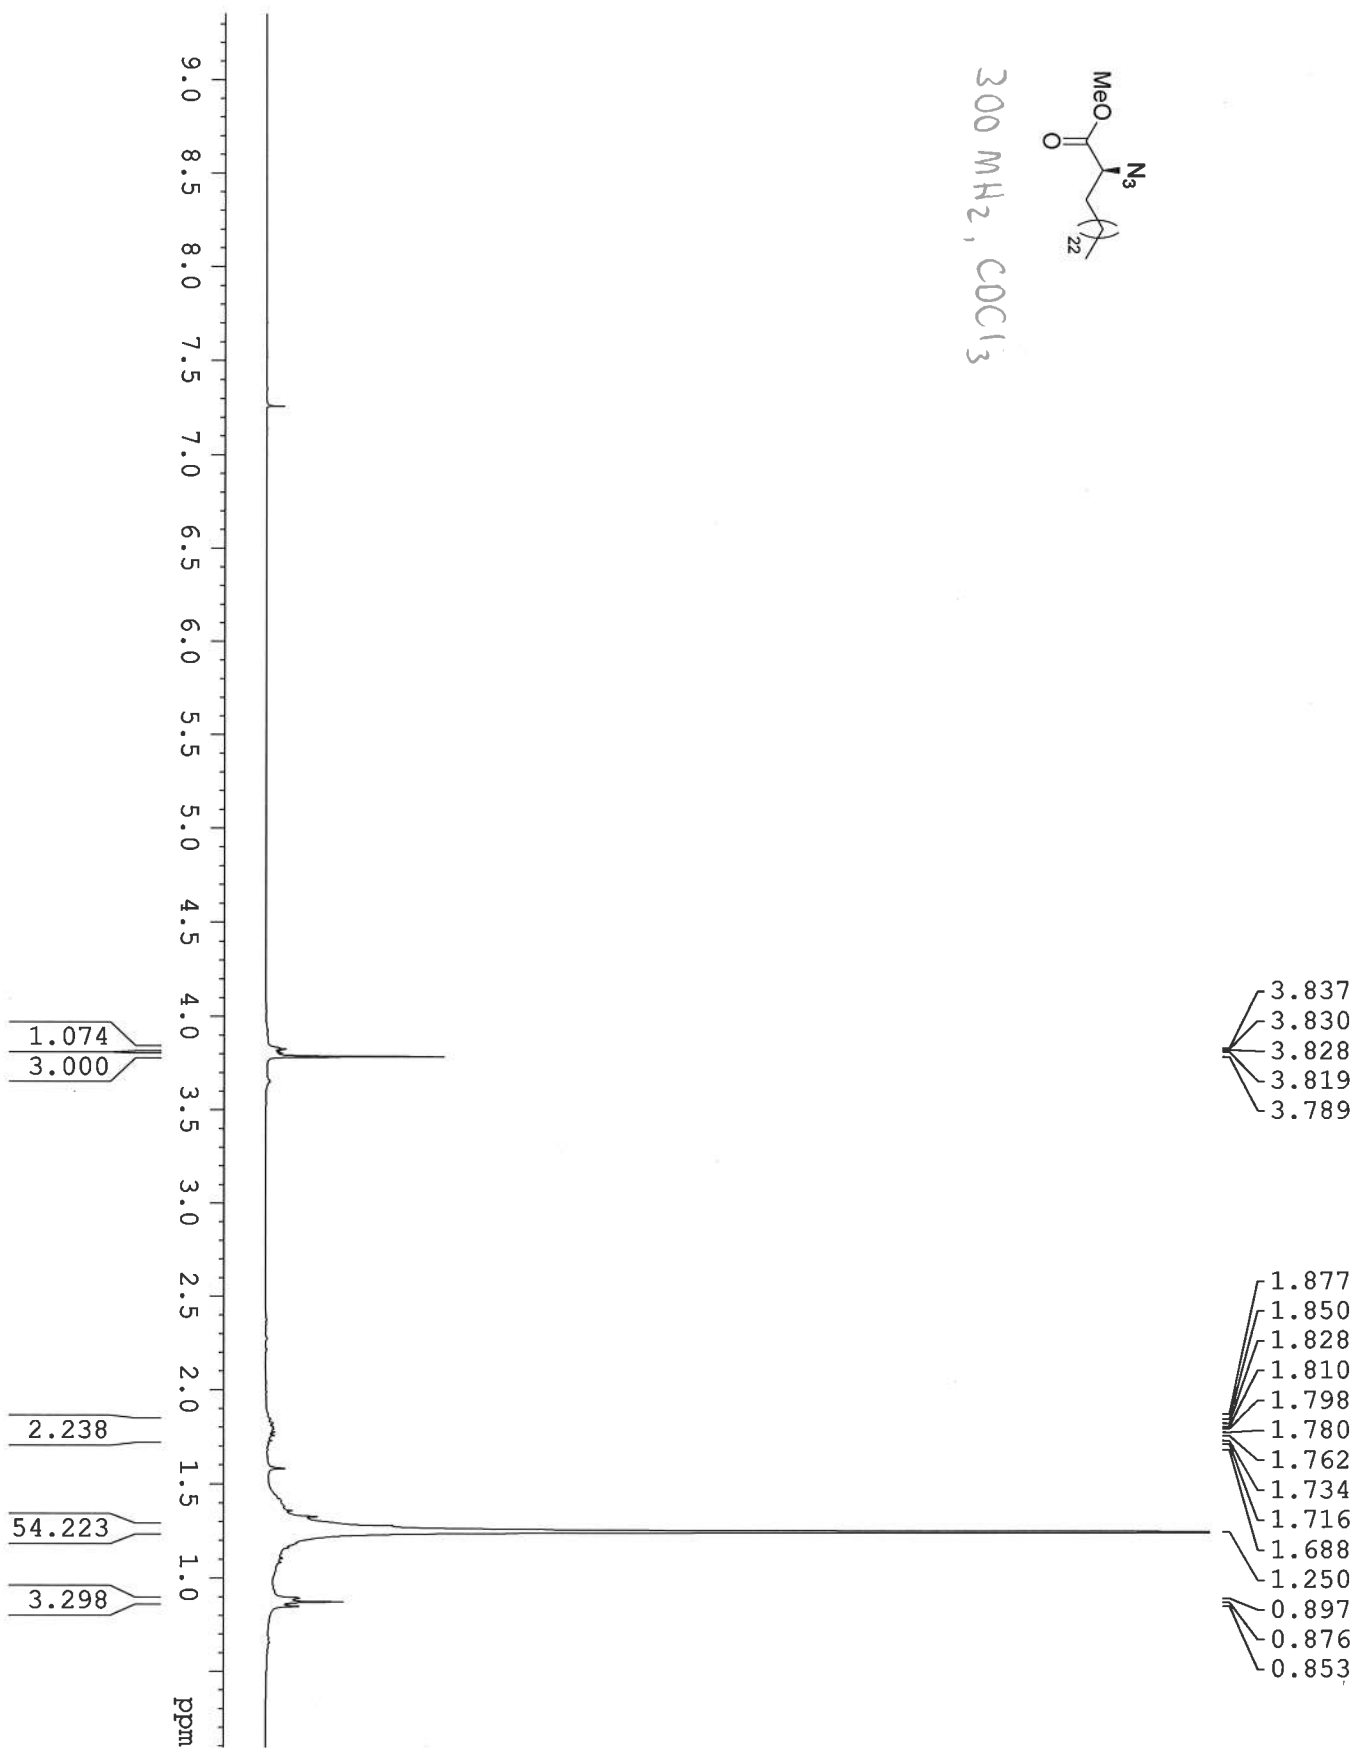

100 MHz, CDCl<sub>3</sub>

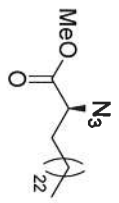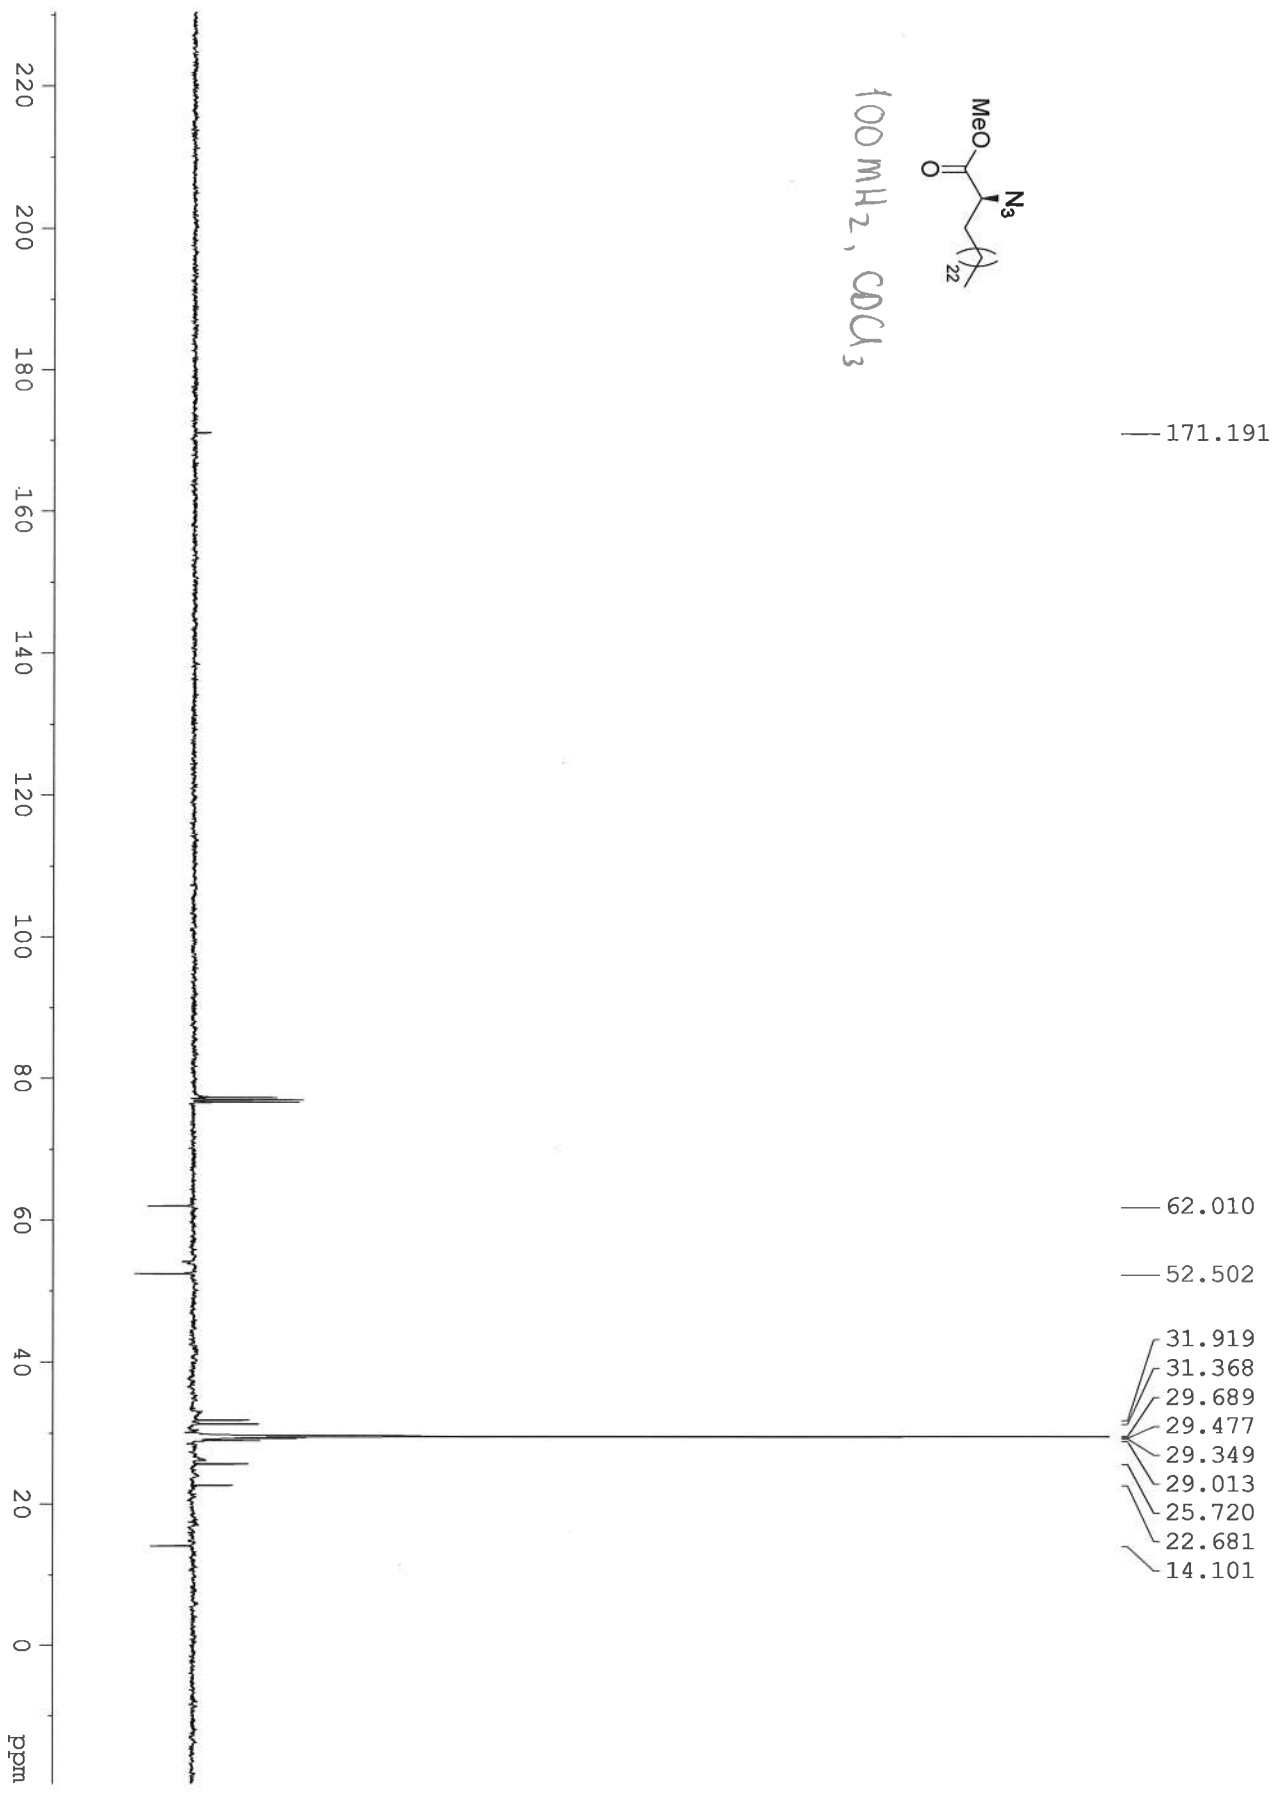

(S)-15, 300 MHz, CDCl<sub>3</sub>

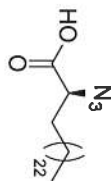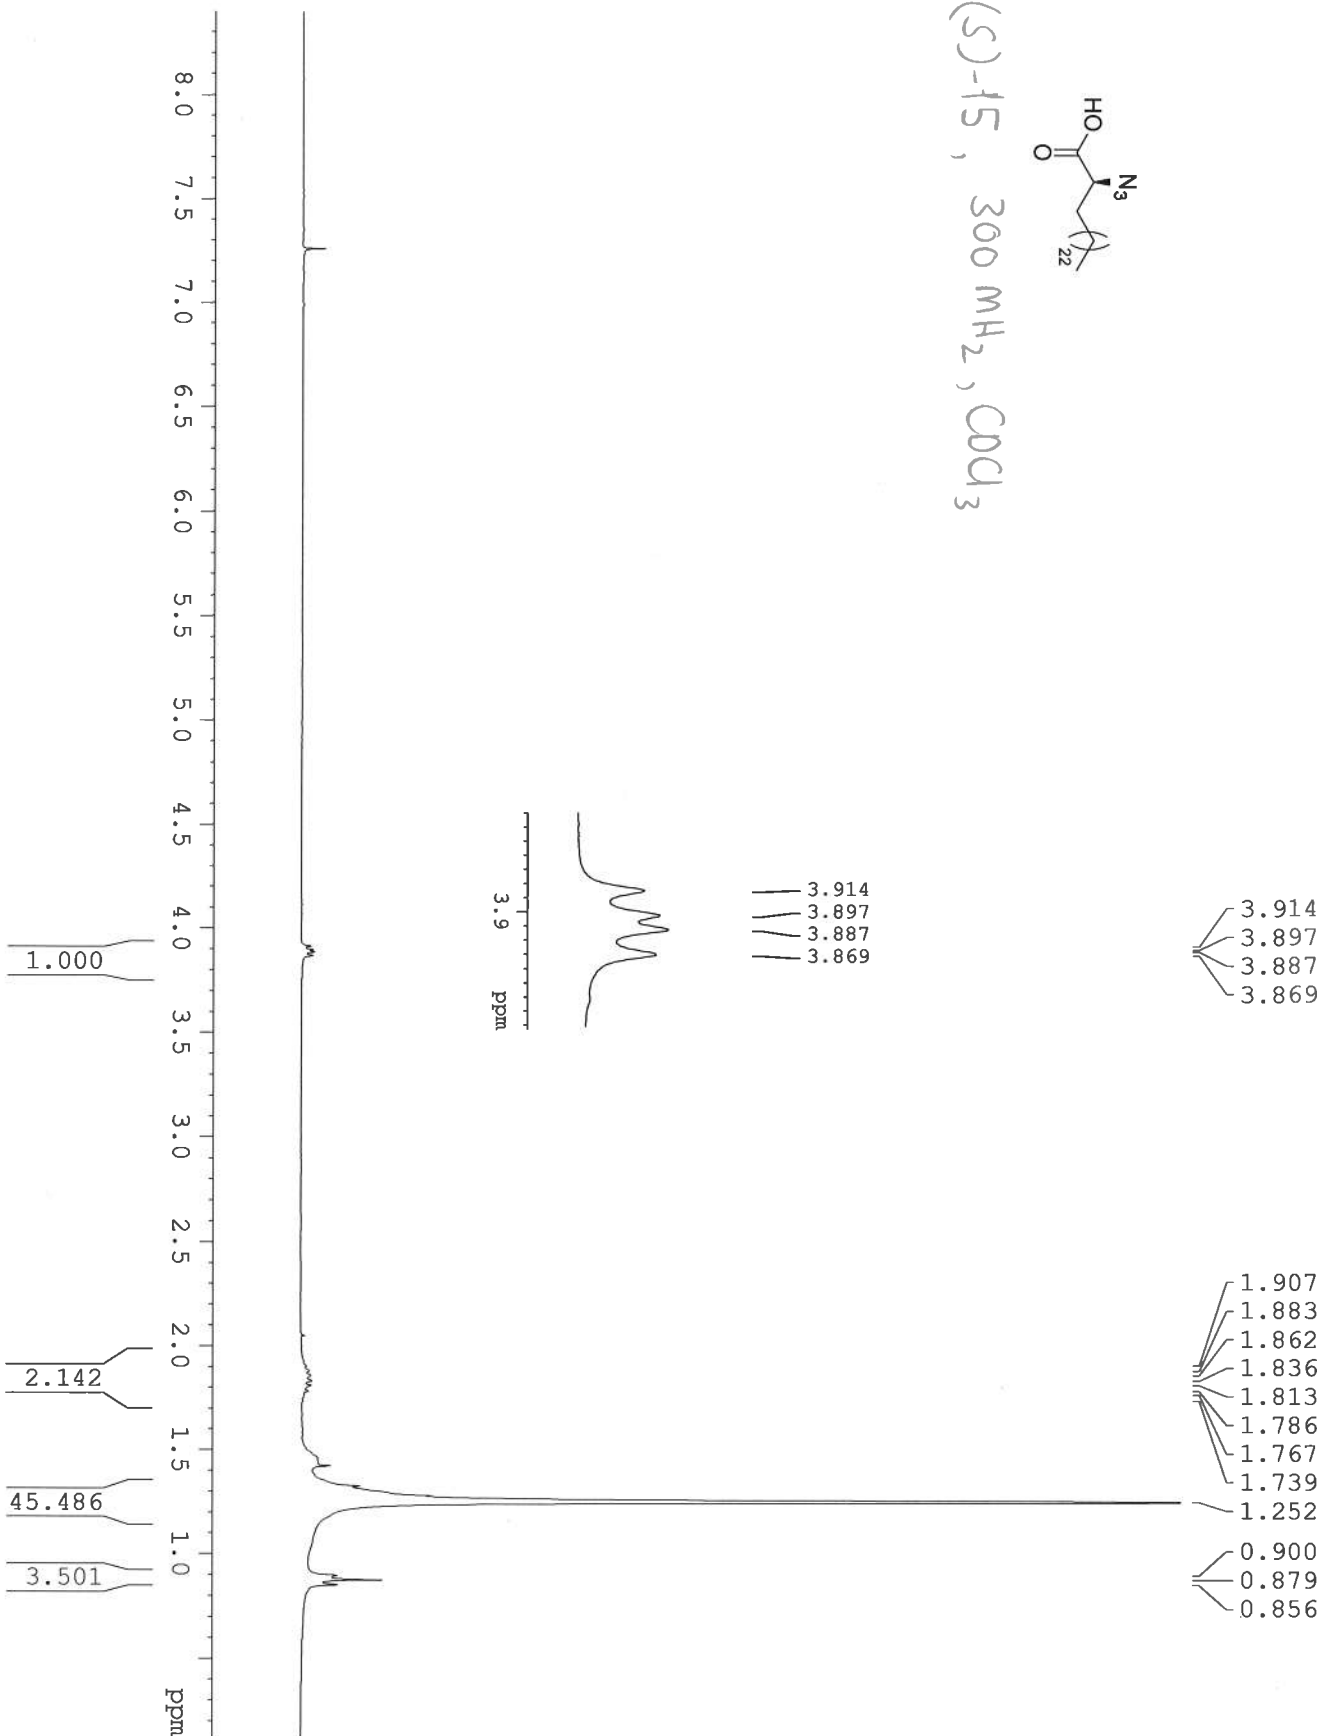

(S)-15, 100 MHz, CDCl<sub>3</sub>

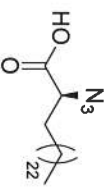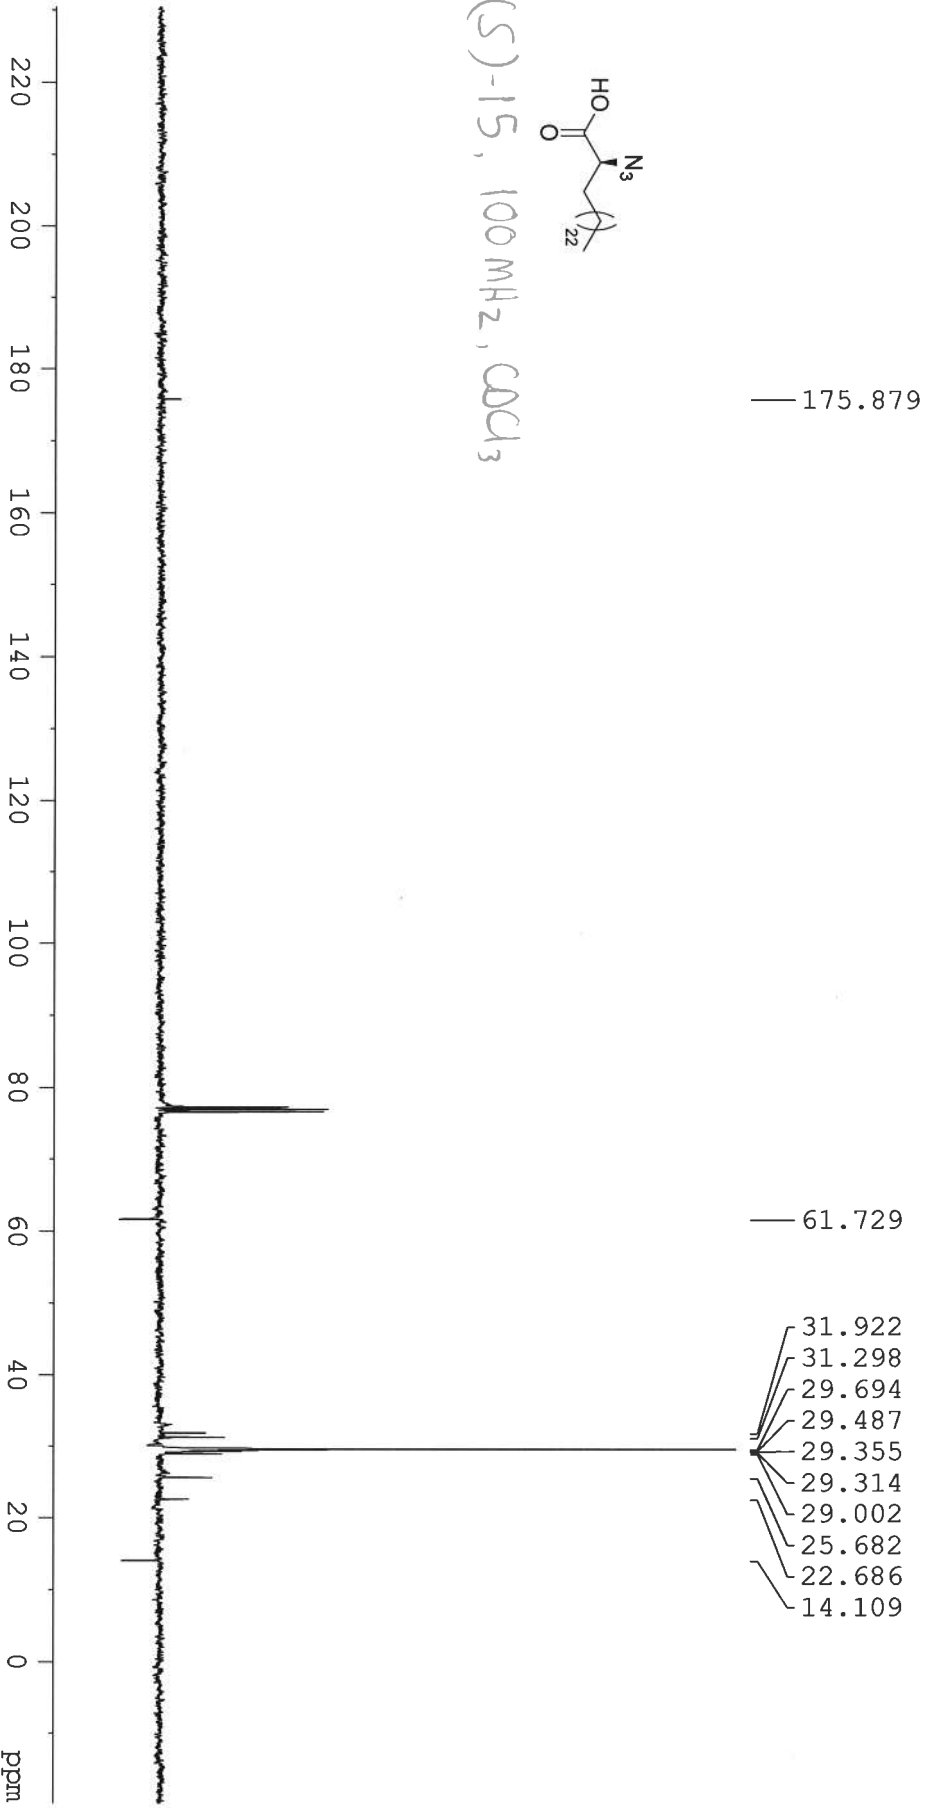

JN3-31

Justy Wojno - C26 alfa bromination

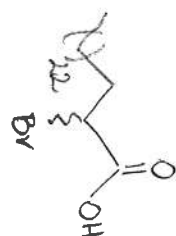

NAME 06-03-Besra-26  
EXPNO 10  
PROCNO 1  
Date\_ 20090603  
Time\_ 16.28  
INSTRUM spect  
PROBHD 5 mm PABBO BB-  
PULPROG zg30  
TD 32768  
SOLVENT CDC13  
NS 32  
DS 2  
SWH 6009.615 Hz  
FIDRES 0.183399 Hz  
AQ 2.7263477 sec  
RG 256  
DWM 83.200 usec  
DE 13.19 usec  
TE 283.2 K  
D1 1.00000000 sec  
TD0 1

===== CHANNEL f1 =====  
NUC1 1H  
P1 12.80 usec  
PL1 1.00 dB  
PL1W 9.57725906 W  
SFO1 300.1318534 MHz  
SI 32768  
SF 300.1300057 MHz  
WDW EM  
SSB 0  
LB 0.30 Hz  
GB 0  
PC 1.00

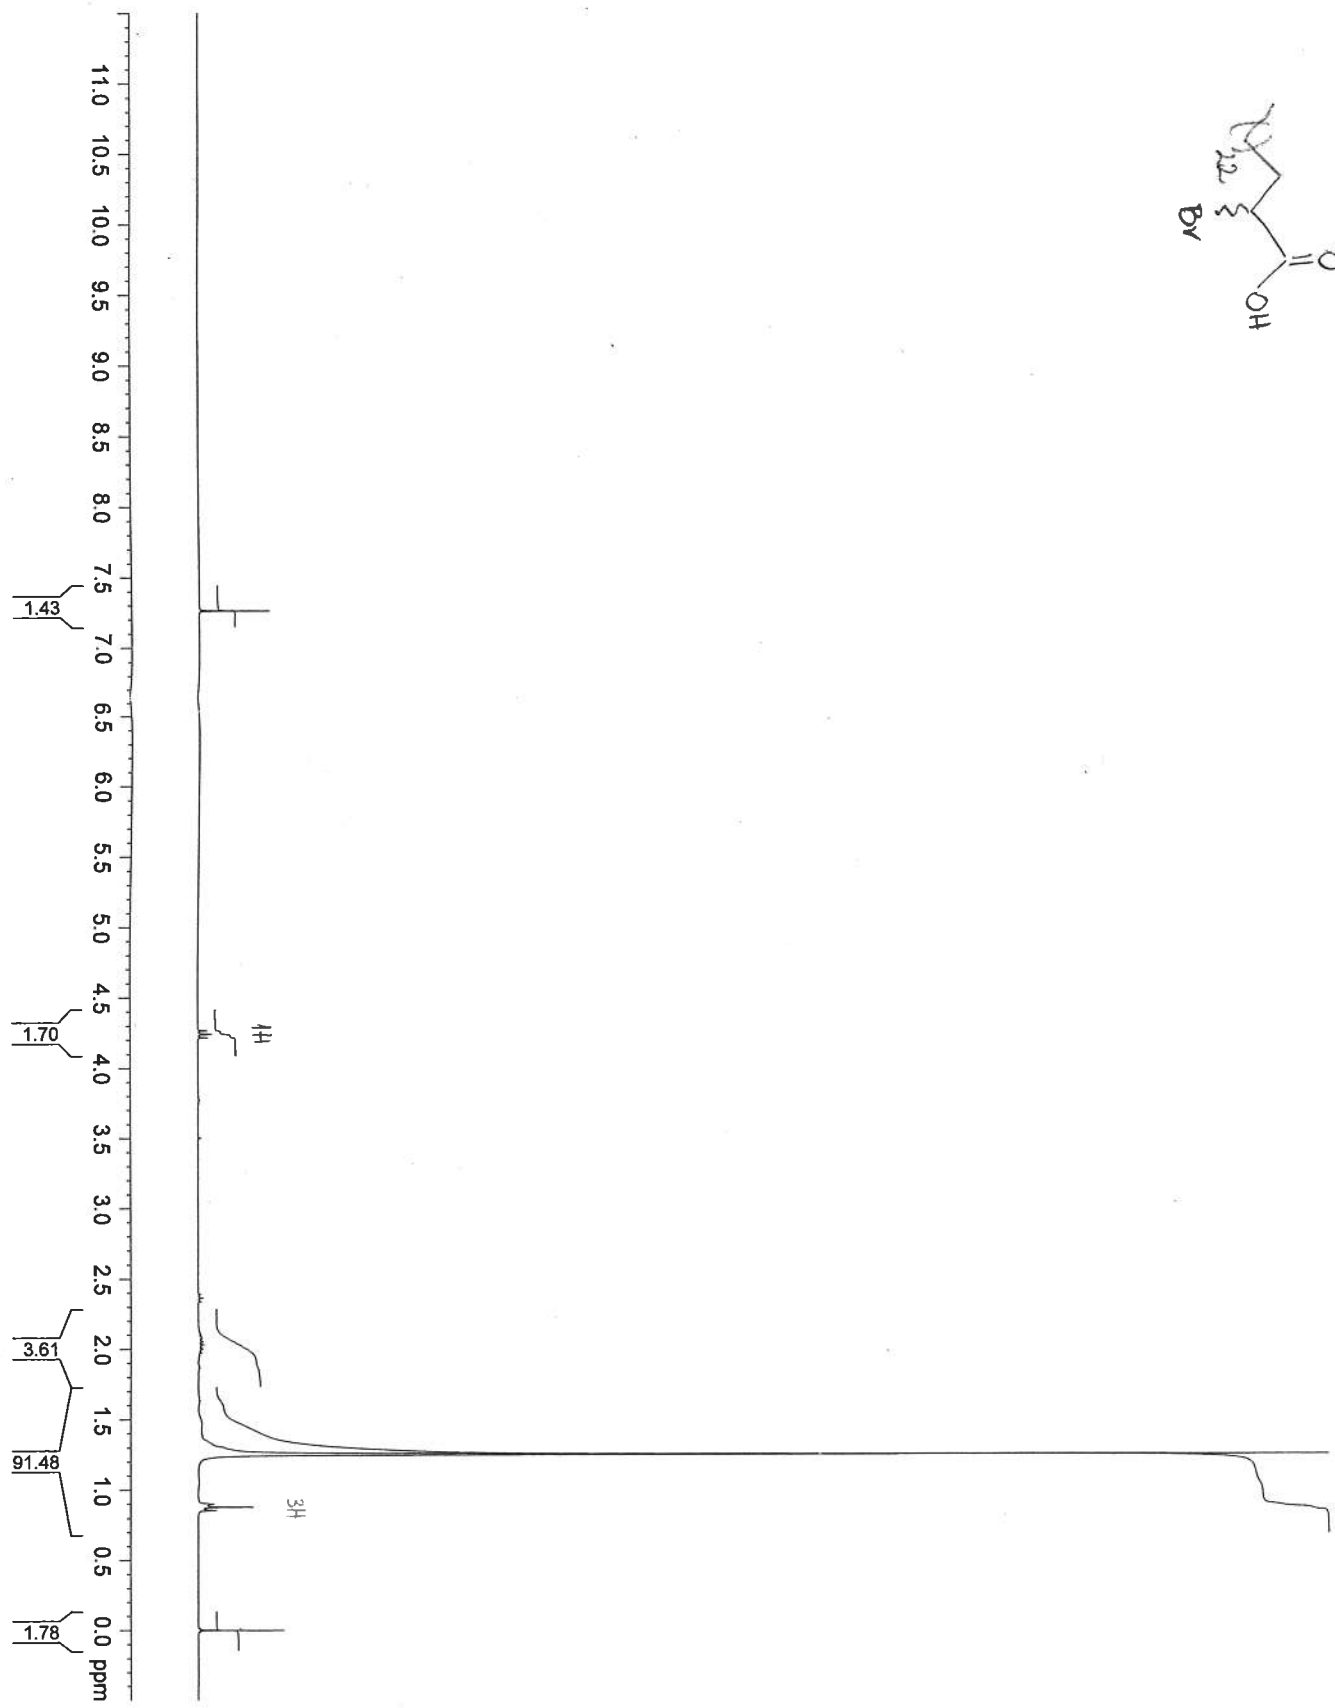



JN3-31

Justyna Wojno, CDCI3, +27C, AV400  
13C-PENDANT, 1H-decoupled  
Barcode label 1277

*Mon on est  
d'origine  
Nully*

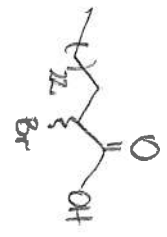

NAME 06-03 5.FAC  
 EXPNO 10  
 PROCNO 1  
 Date 20090603  
 Time 17.11  
 INSTRUM av400  
 PROBHD 5 mm BBO BB-1H  
 PULPROG gpcpradms  
 TD 65536  
 SOLVENT CDCI3  
 NS 512  
 DS 16  
 SWH 25125.629 Hz  
 FIDRES 0.383387 Hz  
 AQC 1.3042164 sec  
 RG 16384  
 DW 19.900 usec  
 DE 6.50 usec  
 TE 301.1 K  
 CNST2 145.0000000  
 CNST3 1.0000000  
 CNST4 5.0000000  
 D1 1.500000000 sec  
 D2 0.00172414 sec  
 D3 0.00431034 sec  
 D12 0.00002000 sec  
 D13 0.00000400 sec  
 TD0 1

===== CHANNEL f1 =====  
 NUC1 13C  
 P1 10.60 usec  
 P2 21.20 usec  
 PL1 6.00 dB  
 SFO1 100.6086820 MHz

===== CHANNEL f2 =====  
 CPDPRG2 waltz16  
 NUC2 1H  
 P3 10.50 usec  
 P4 21.00 usec  
 PCPD2 100.00 usec  
 PL2 2.00 dB  
 PL12 23.20 dB  
 SF02 400.0723000 MHz  
 SI 65536  
 SF 100.5976820 MHz  
 W/DW EM  
 SSB 0  
 LB 5.00 Hz  
 GB 0  
 PC 1.00

29.7  
29.5

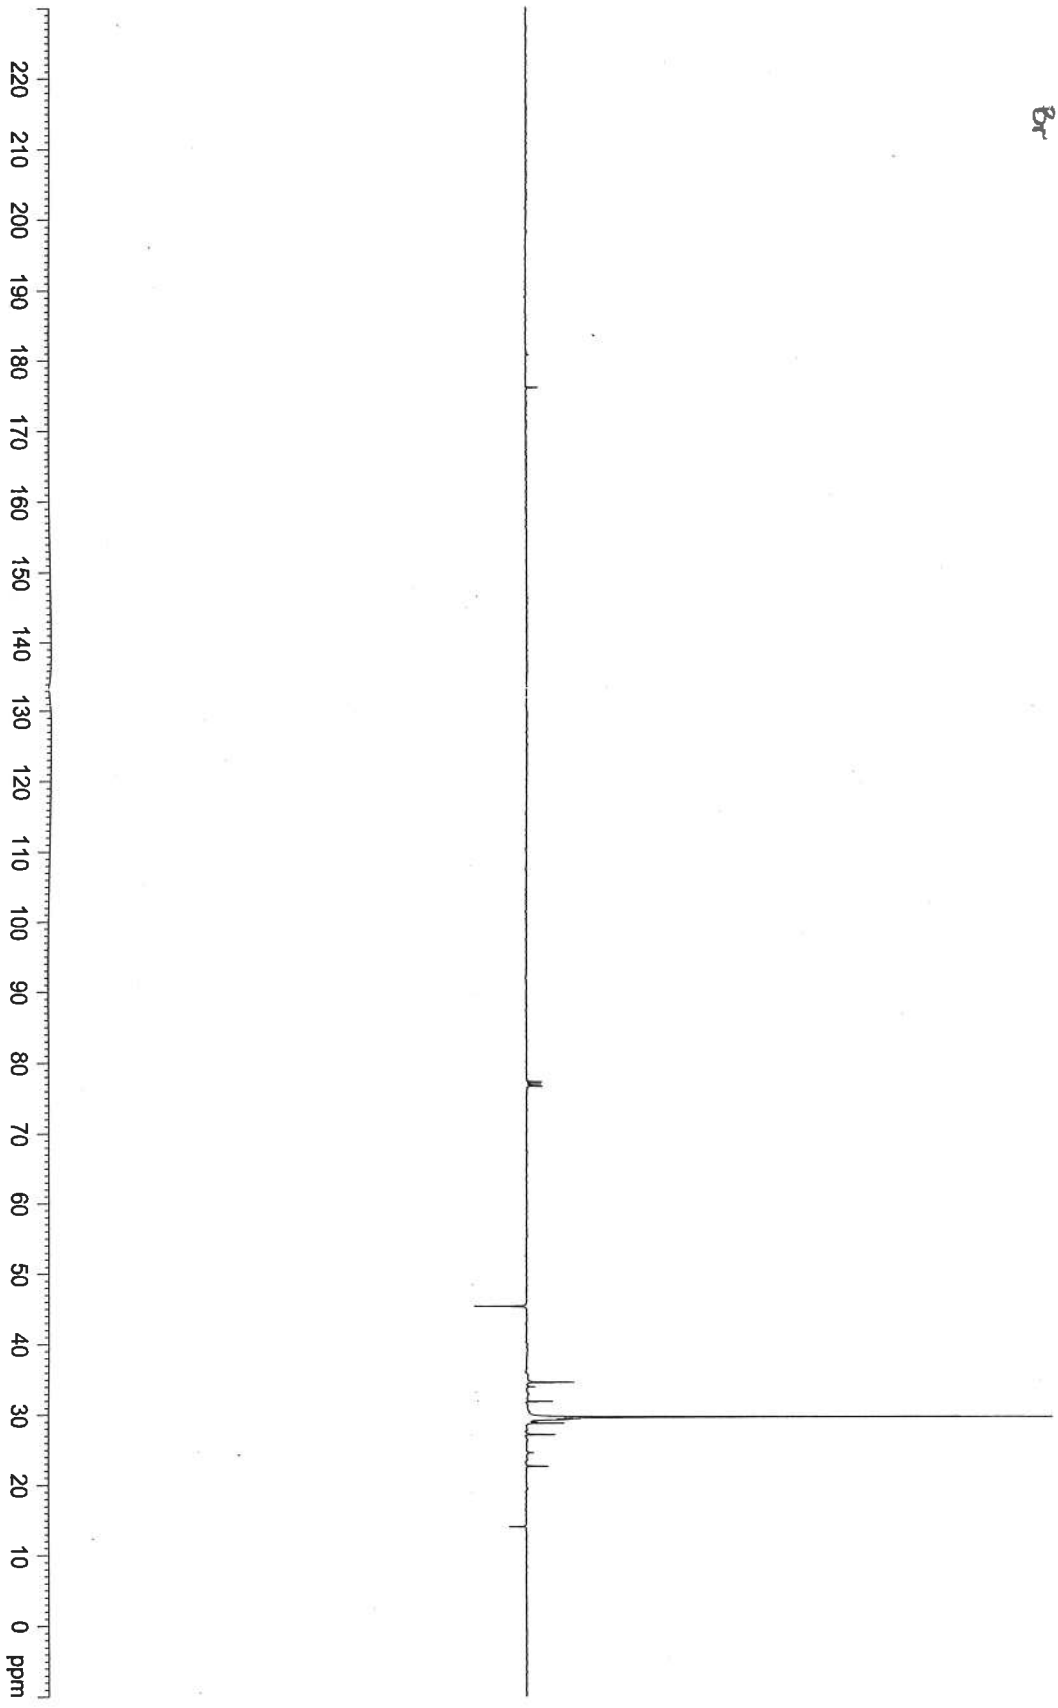

(R/S)-17  
 300 MHz,  
 CDCl<sub>3</sub>/CD<sub>3</sub>OD 2:1

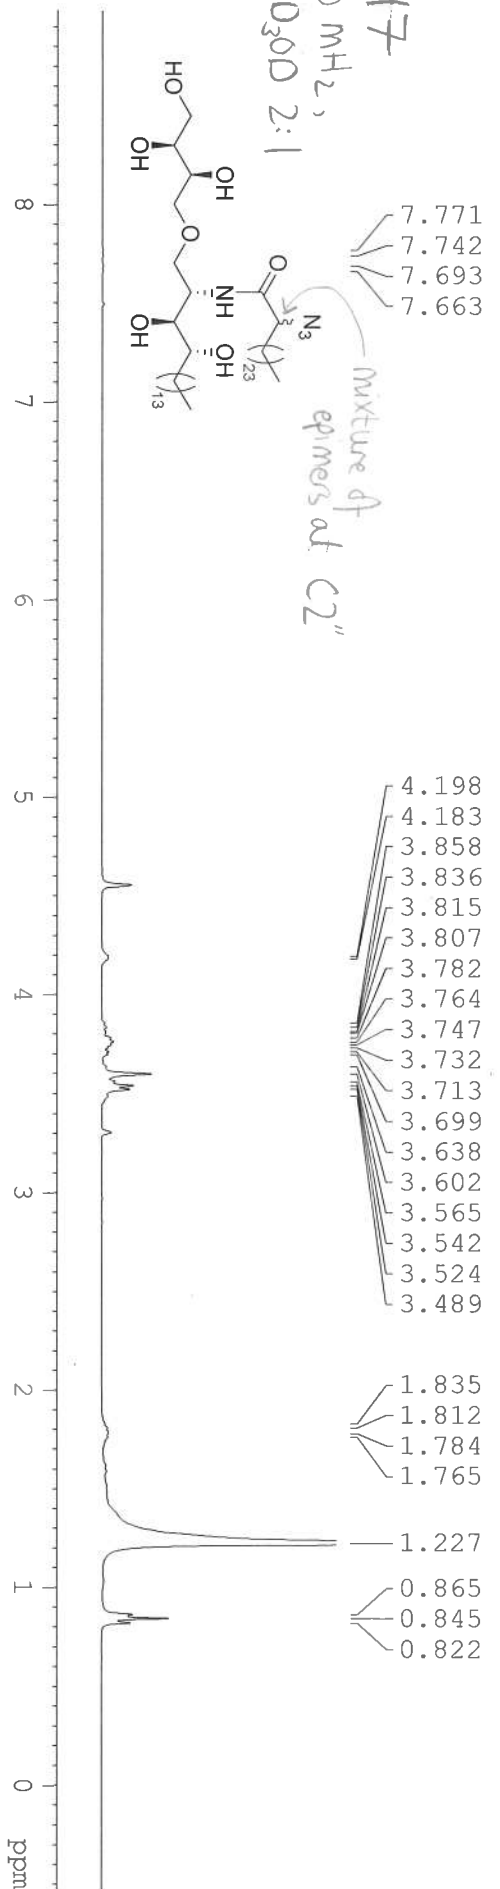

(S)-17  
 300 MHz,  
 CDCl<sub>3</sub>/CD<sub>3</sub>OD  
 2:1

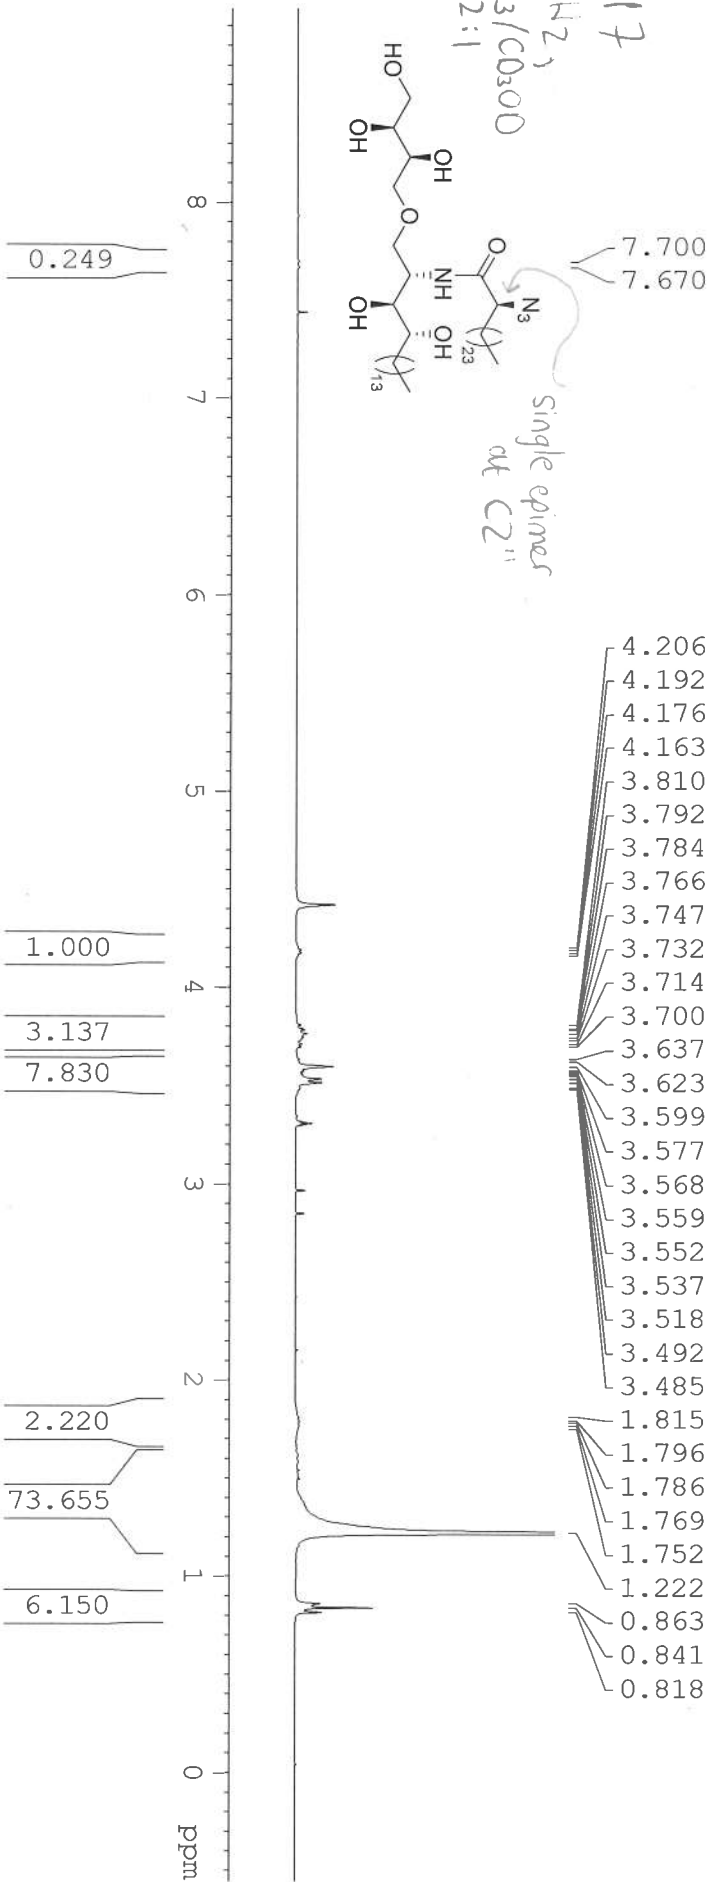

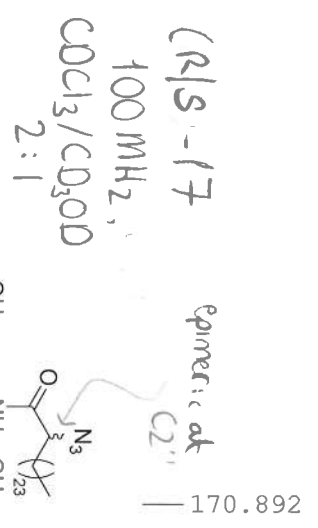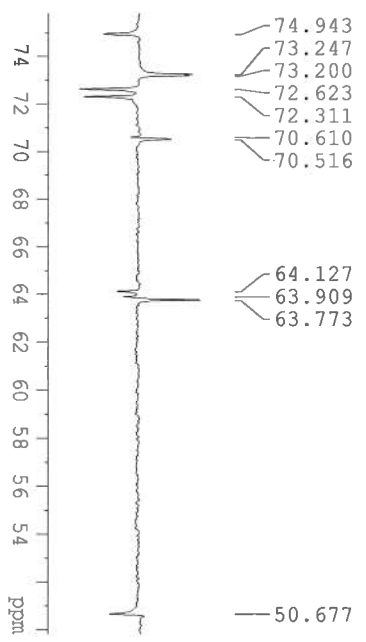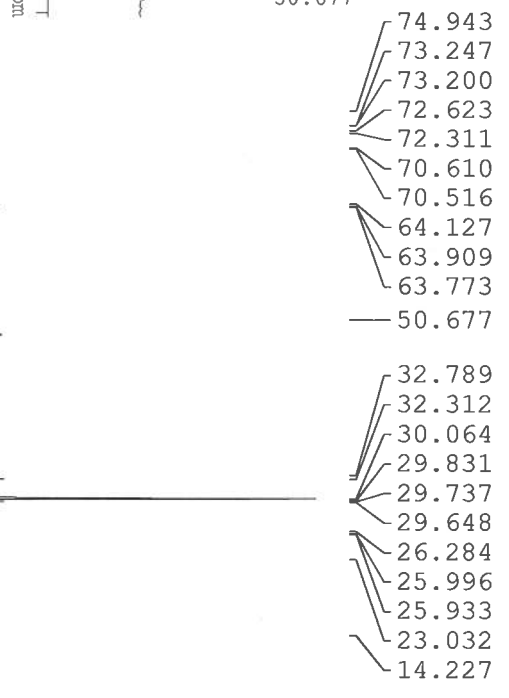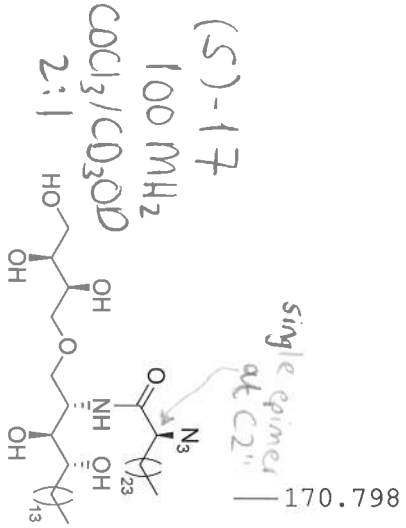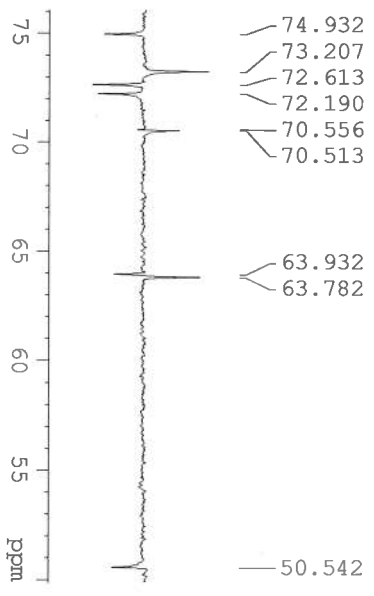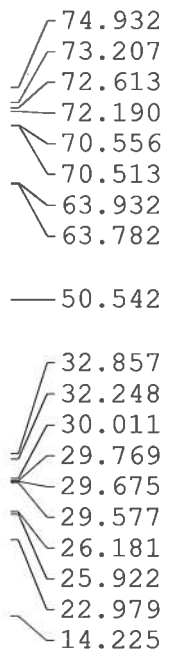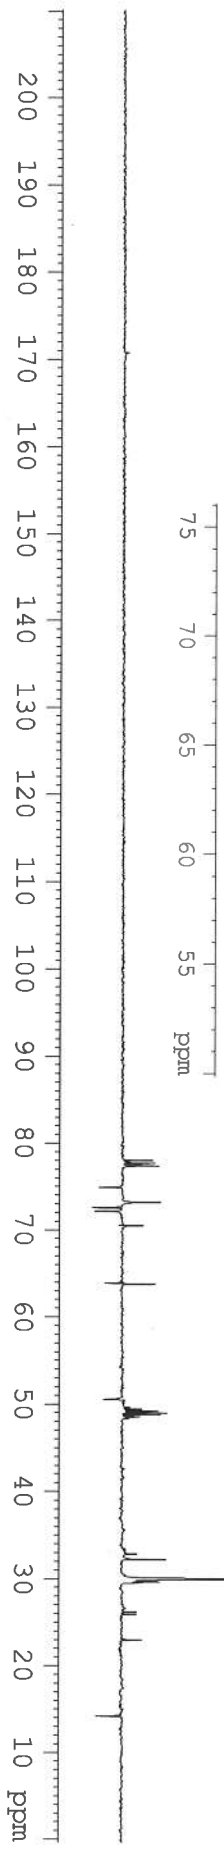

Supplement: bc300556e_si_002.pdf [file bc300556e_si_002.pdf]
