# Supplementary material
Source: PubMed Central journal article supplement (PMC3630740)

# Design, Synthesis and Functional Activity of Labeled CD1d Glycolipid Agonists

*Peter J. Jervis,<sup>†‡#</sup> Paolo Polzella,<sup>§#</sup> Justyna Wojno,<sup>†‡¶</sup> John-Paul Jukes,<sup>§</sup> Hemza  
Ghadbane,<sup>§</sup> Yoel R. Garcia Diaz,<sup>†‡f</sup> Gurdyal S. Besra,<sup>‡\*</sup> Vincenzo Cerundolo,<sup>§\*</sup> and  
Liam R. Cox<sup>†\*</sup>*

<sup>†</sup>School of Chemistry, University of Birmingham, Edgbaston, Birmingham, B15 2TT,  
U. K. <sup>‡</sup>School of Biosciences, University of Birmingham, Edgbaston, Birmingham,  
B15 2TT, U. K. <sup>§</sup>Medical Research Council Human Immunology Unit, Nuffield  
Department of Medicine, Weatherall Institute of Molecular Medicine, University of  
Oxford, Oxford, OX3 9DS, U. K.

<sup>#</sup>These authors contributed equally to this work

[vincenzo.cerundolo@imm.ox.ac.uk](mailto:vincenzo.cerundolo@imm.ox.ac.uk); [g.besra@bham.ac.uk](mailto:g.besra@bham.ac.uk); [l.r.cox@bham.ac.uk](mailto:l.r.cox@bham.ac.uk)

## Supporting Information V

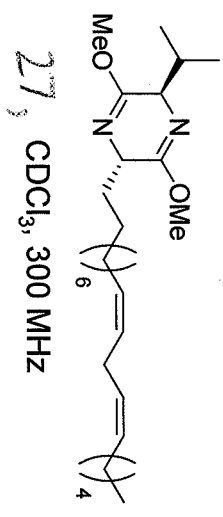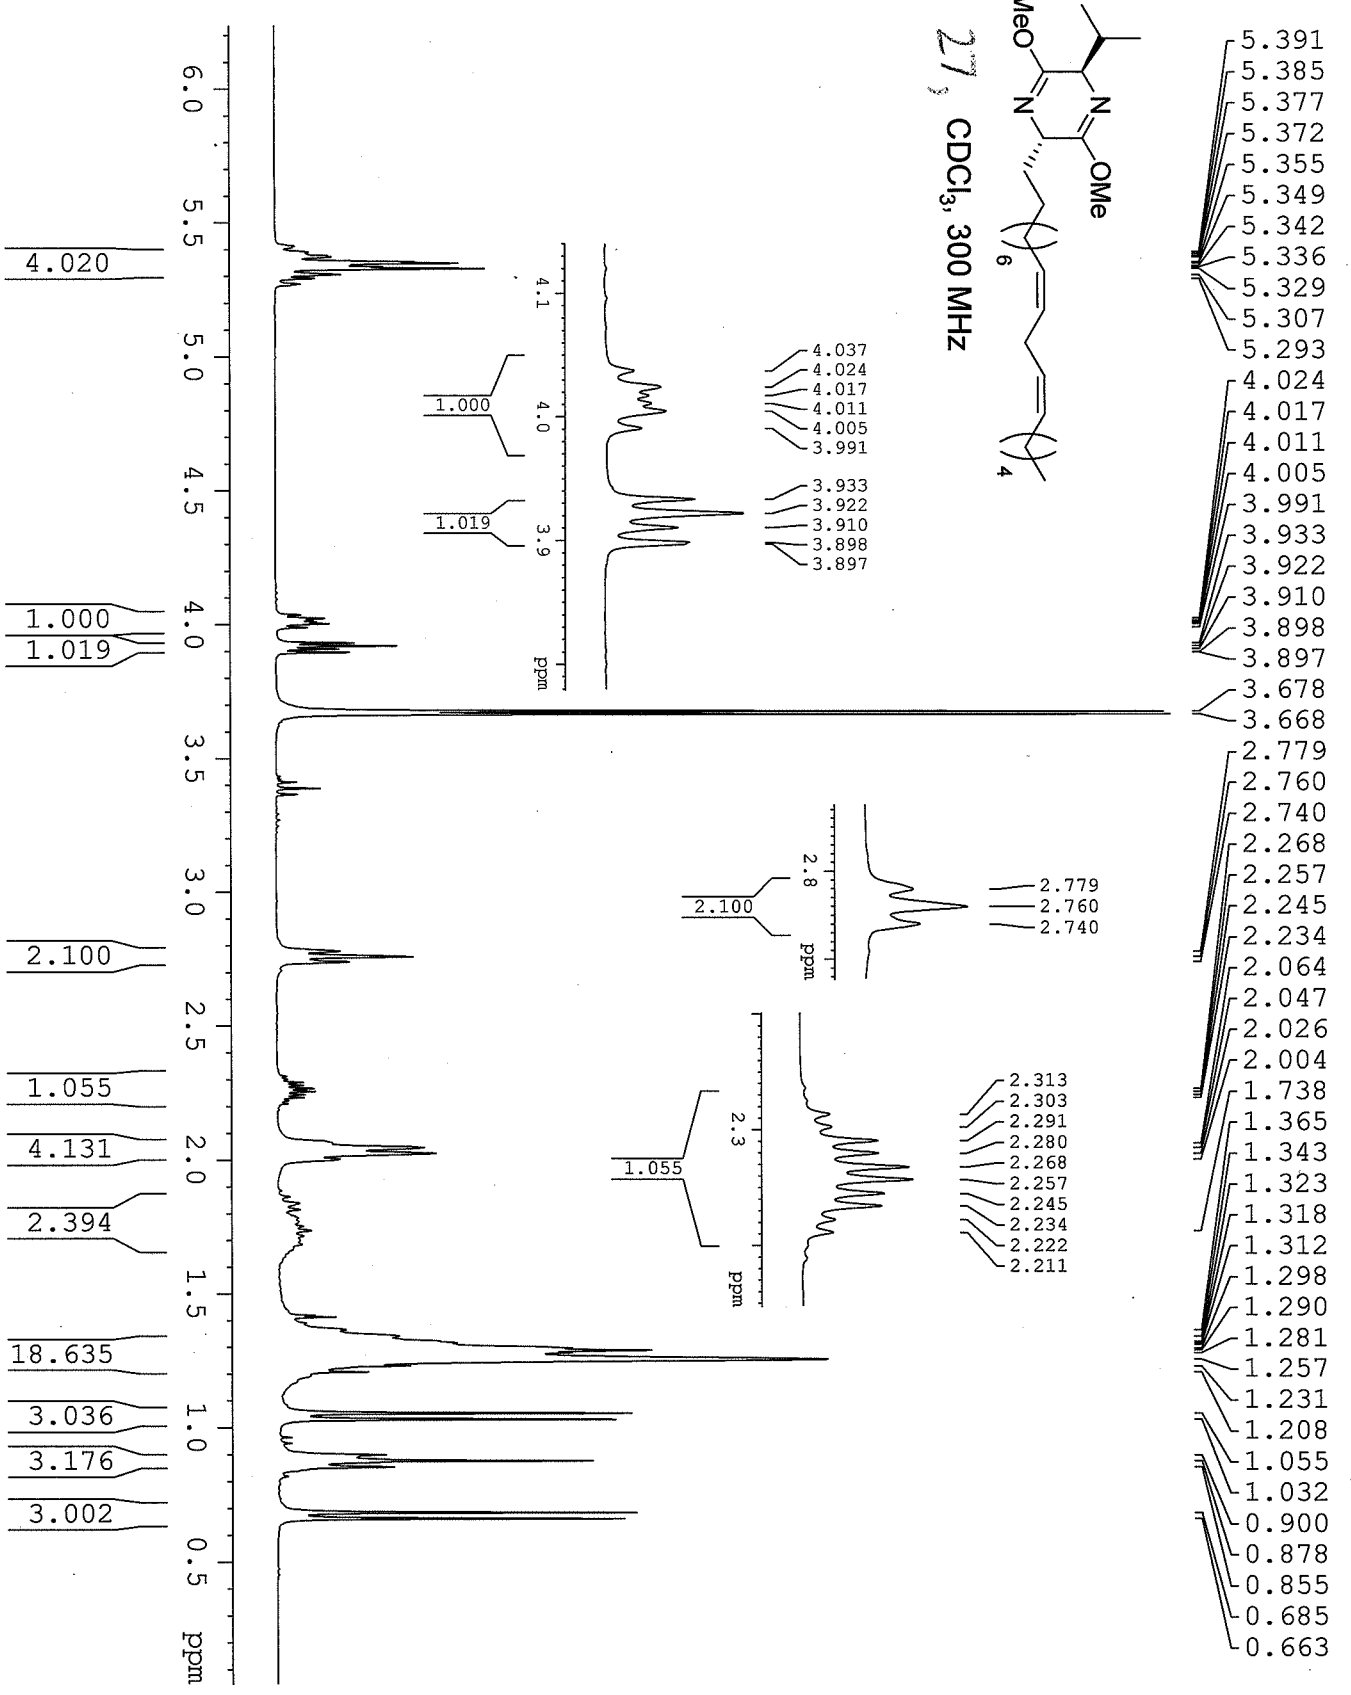

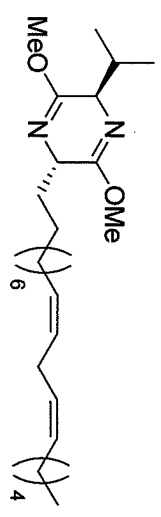

27, CDCl<sub>3</sub>, 100 MHz

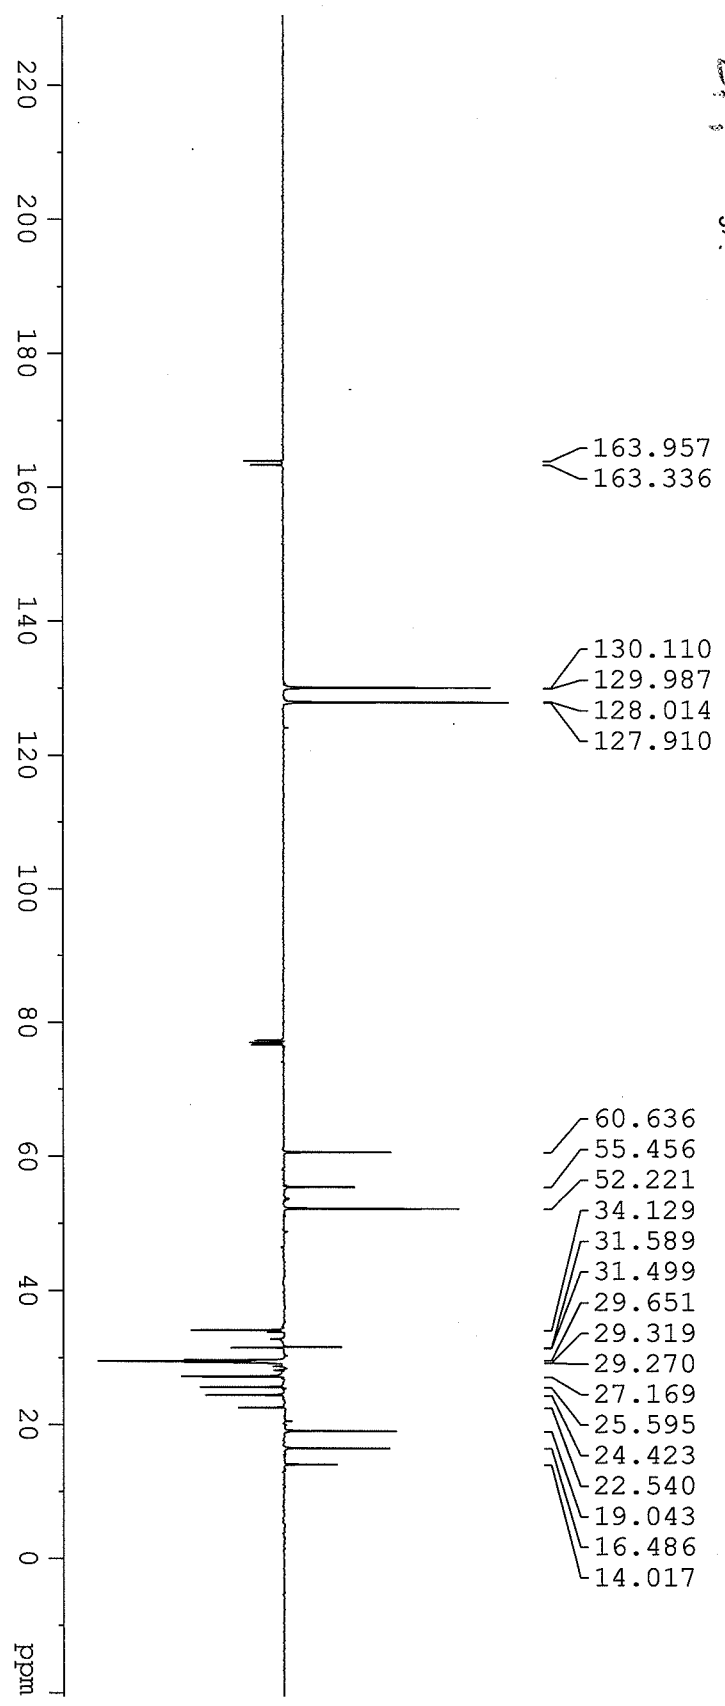

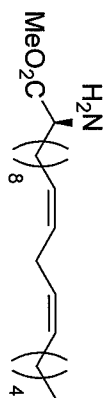

28, 300 MHz, CDCl<sub>3</sub>

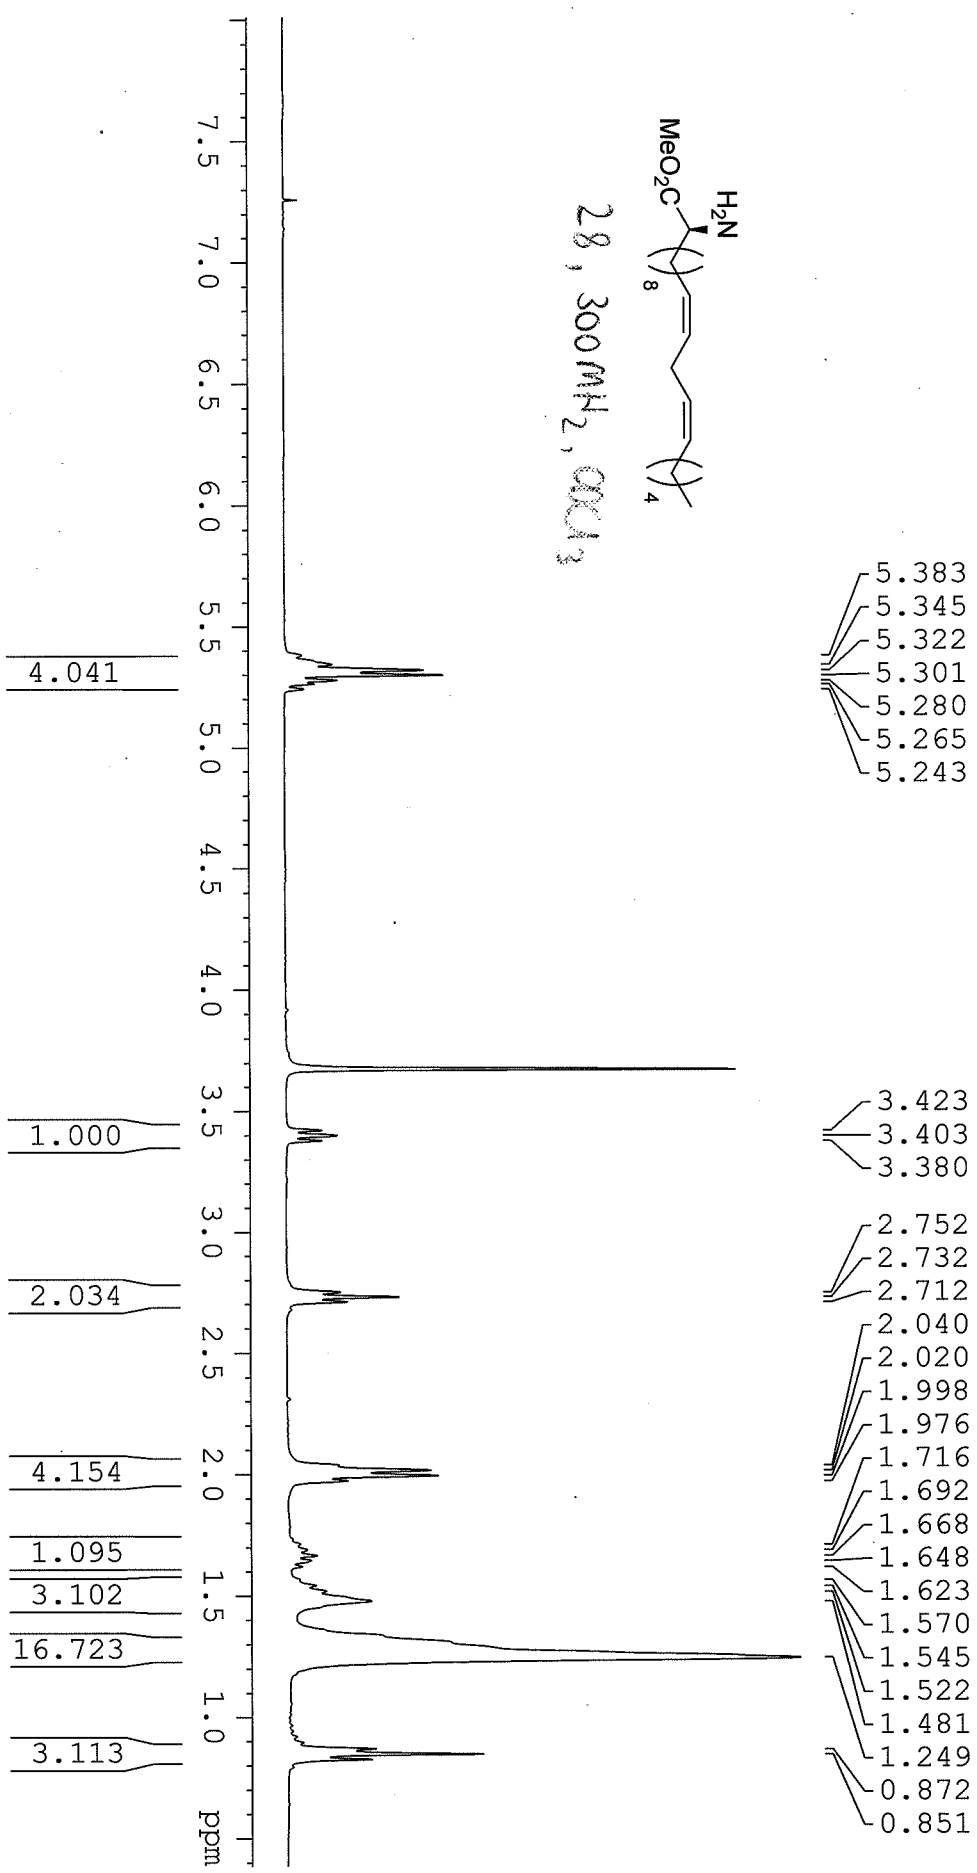

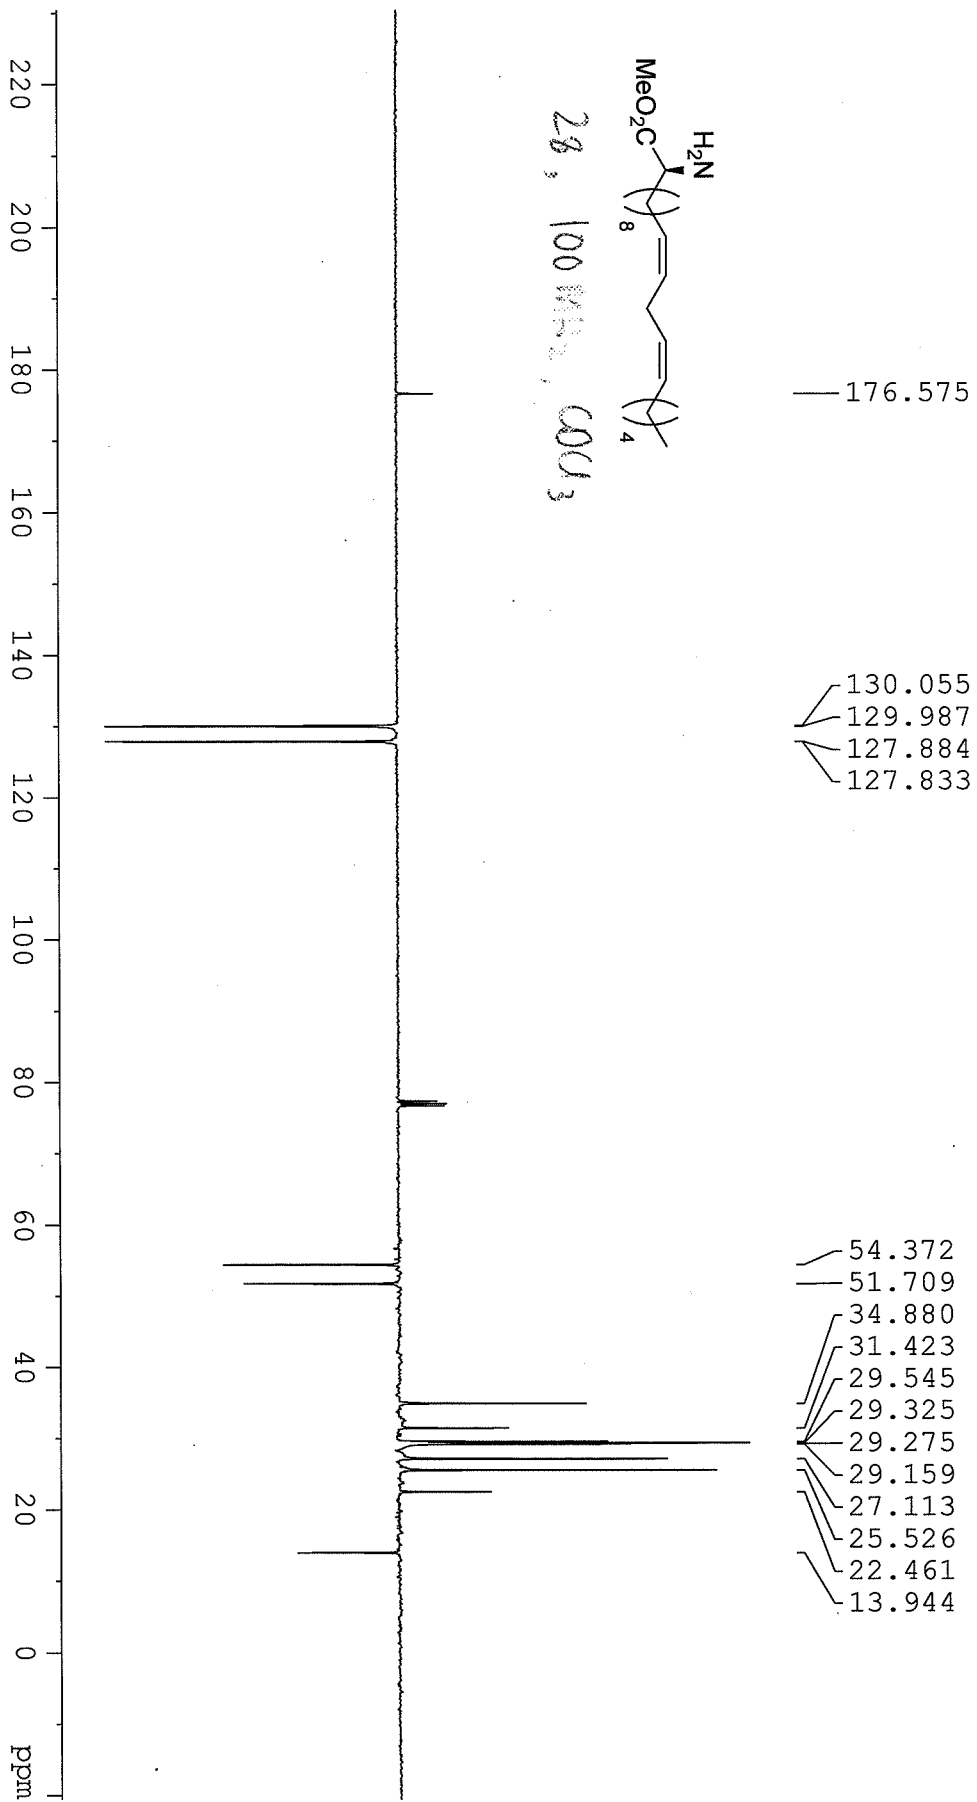

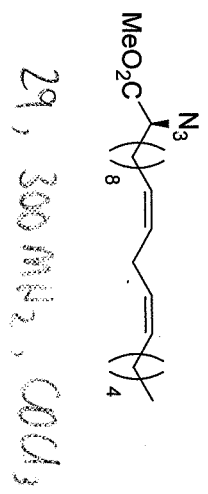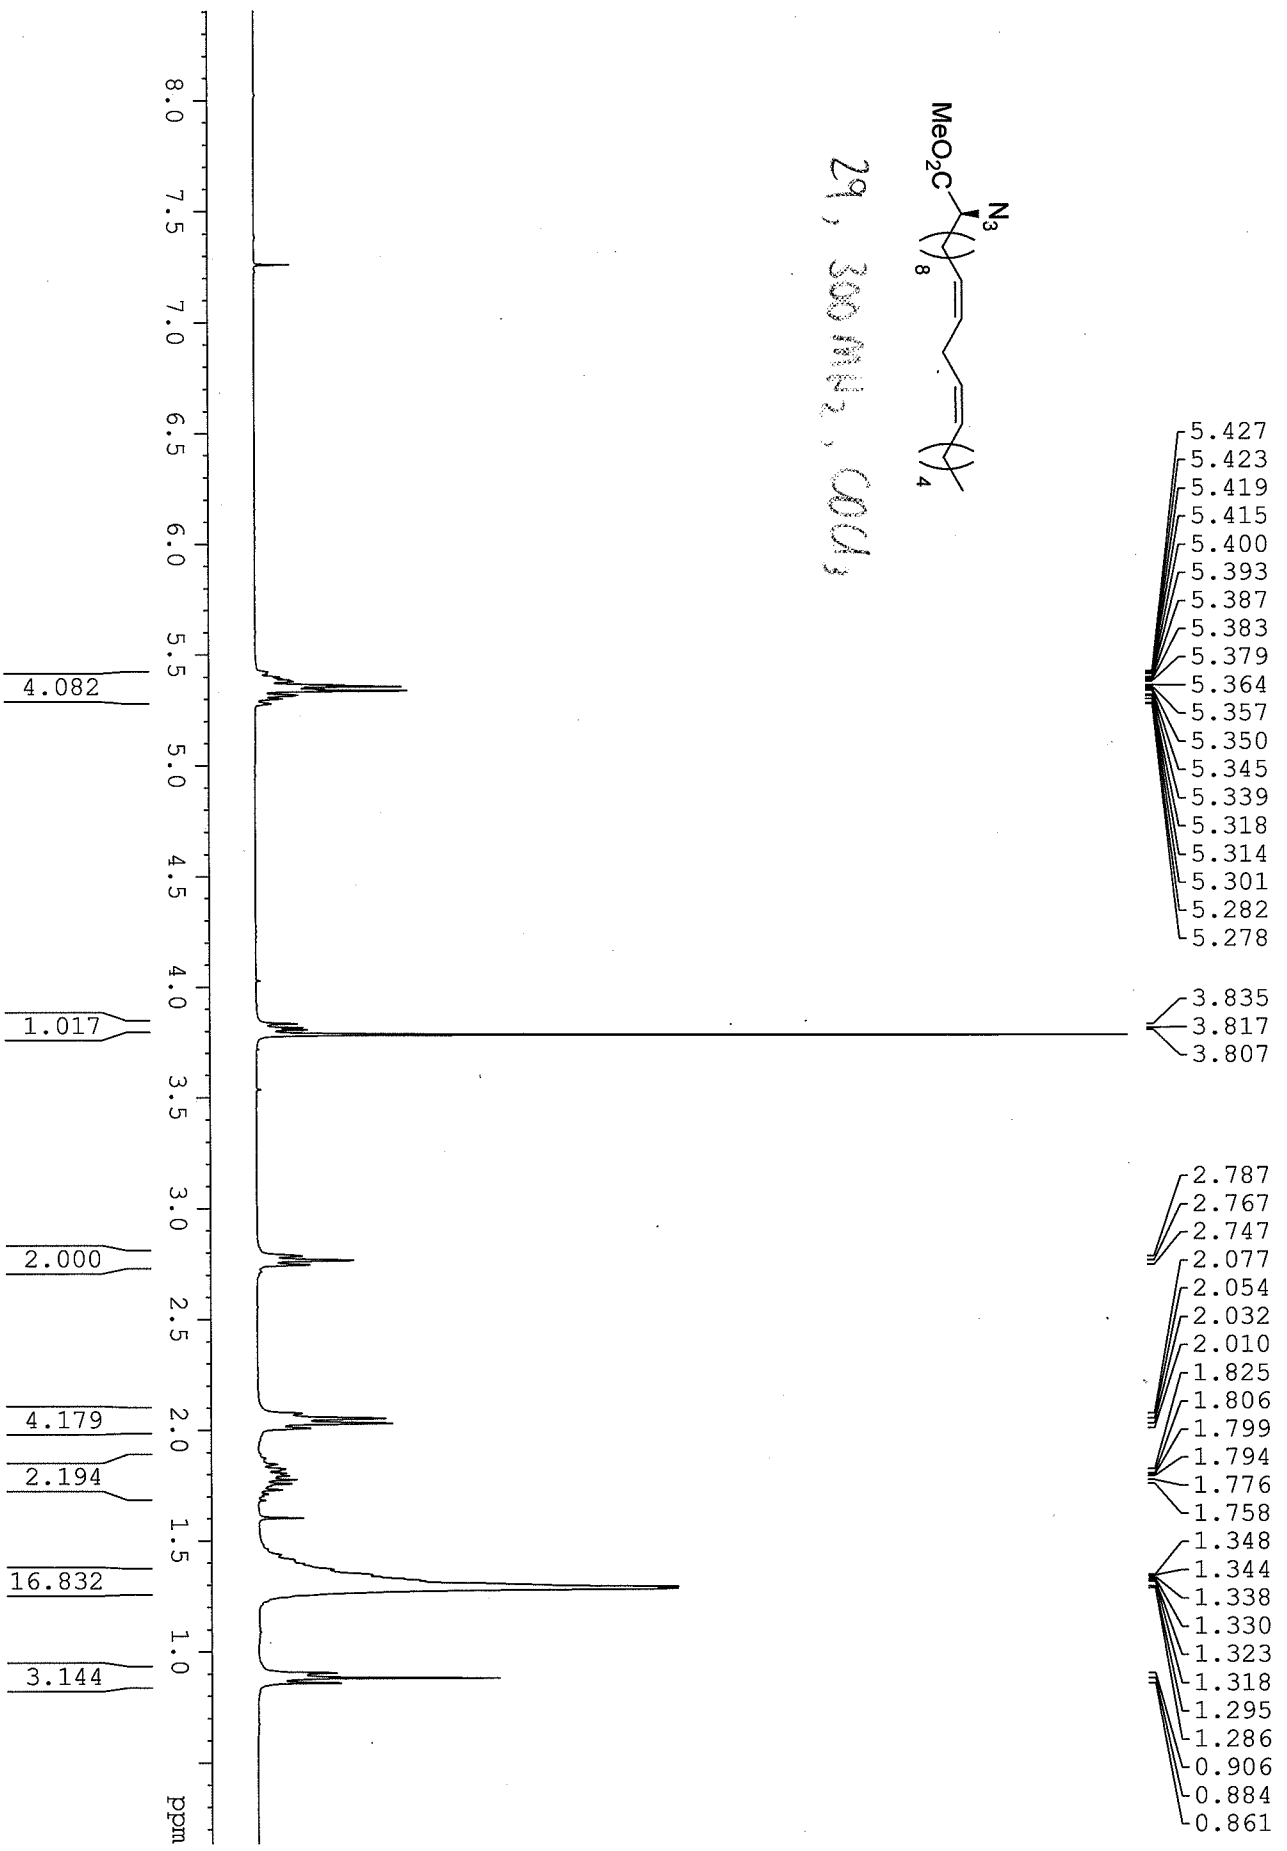

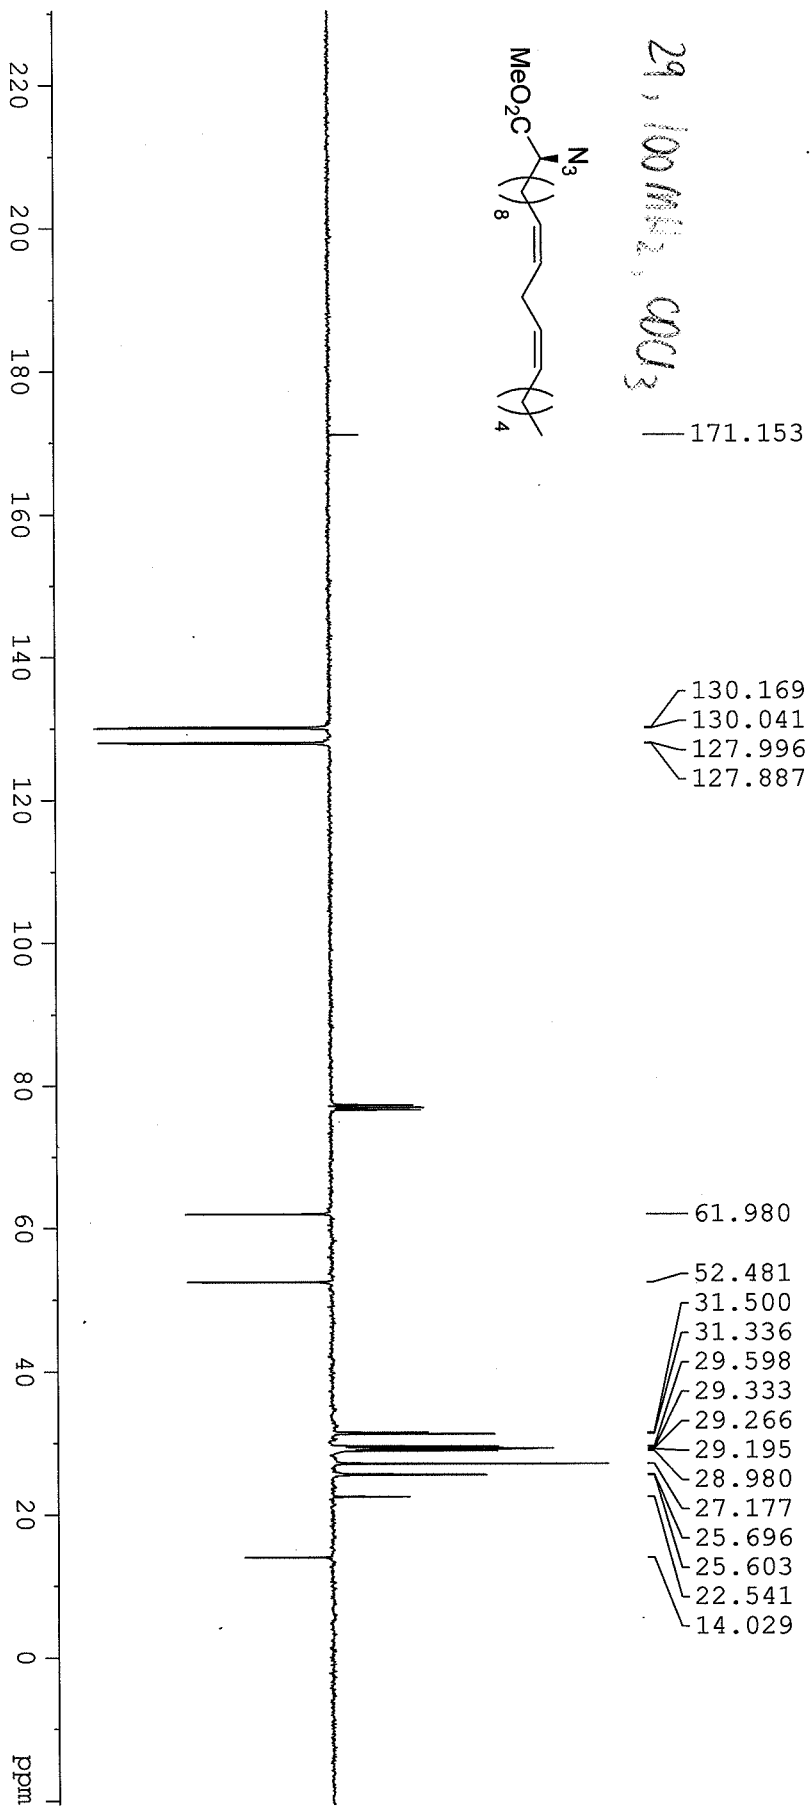

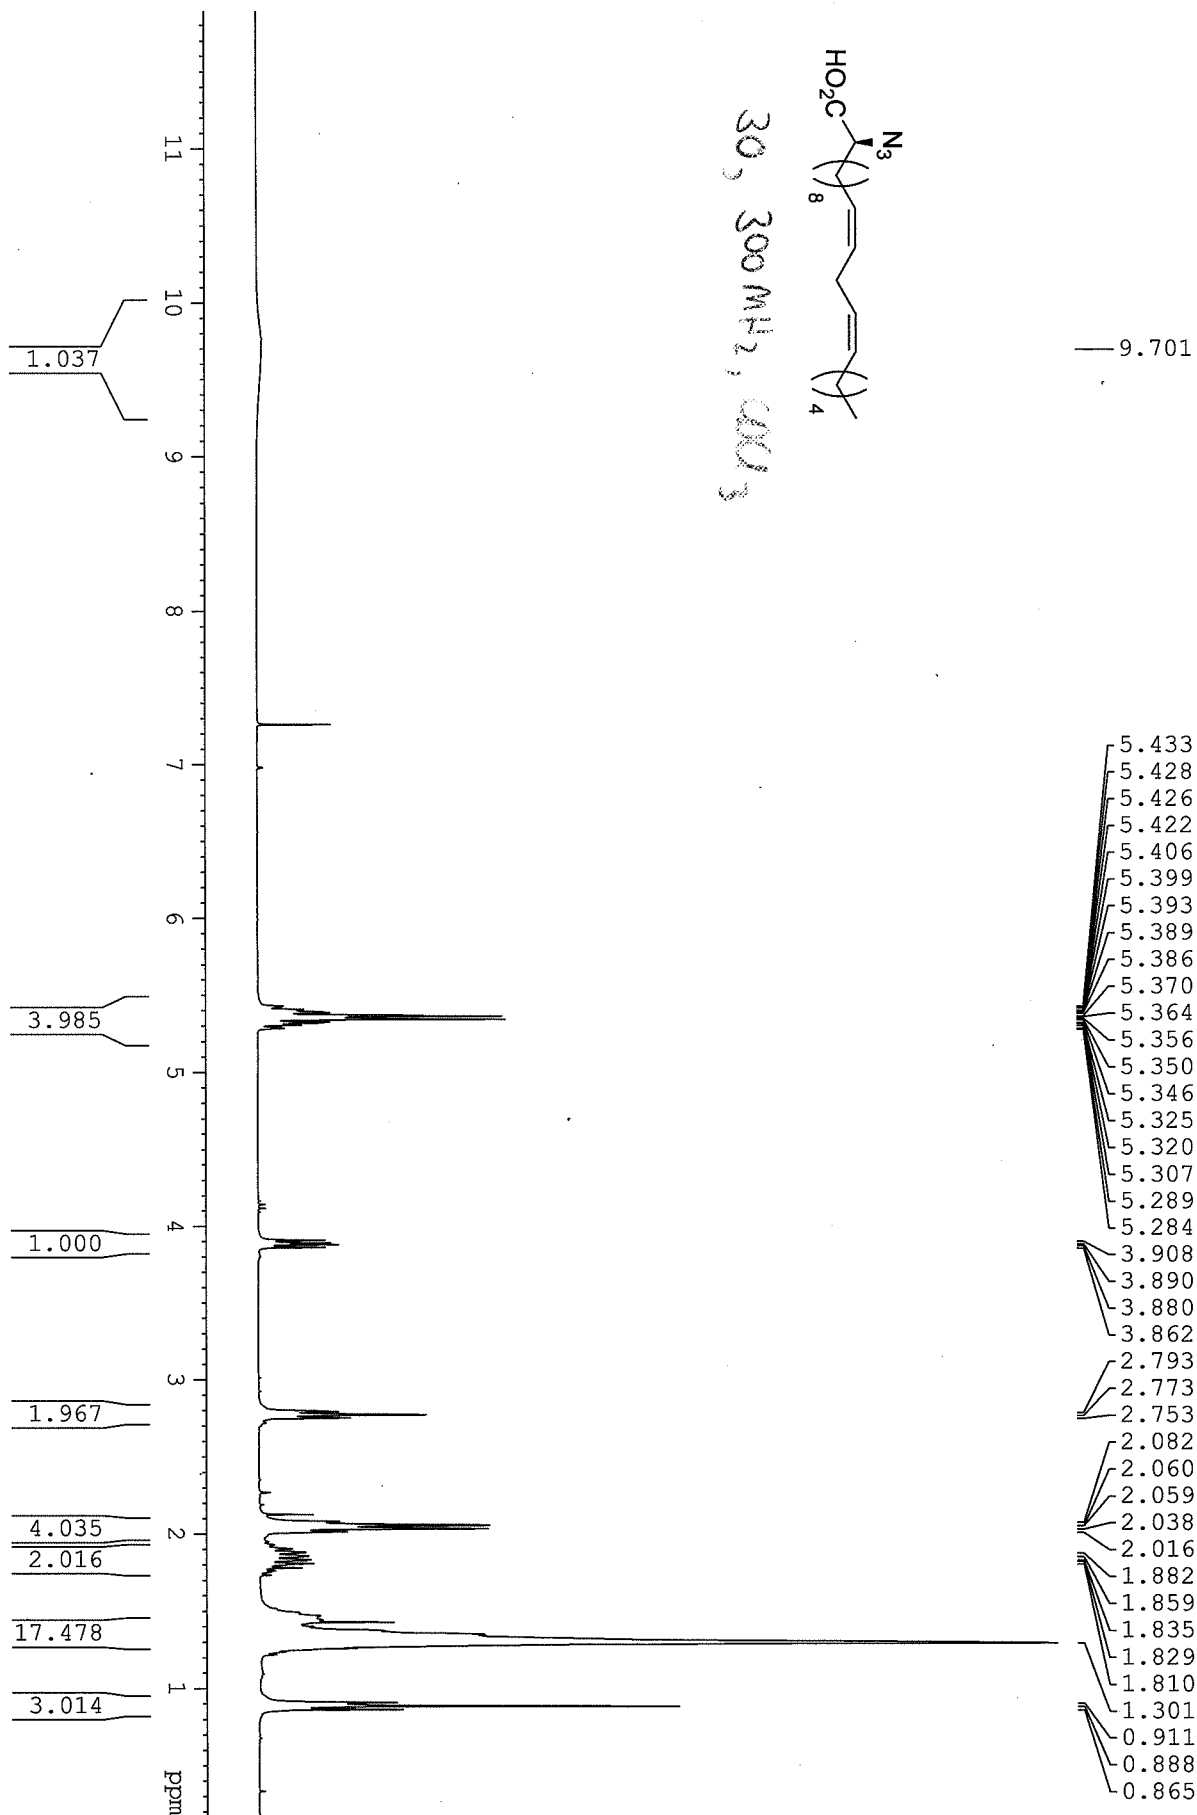



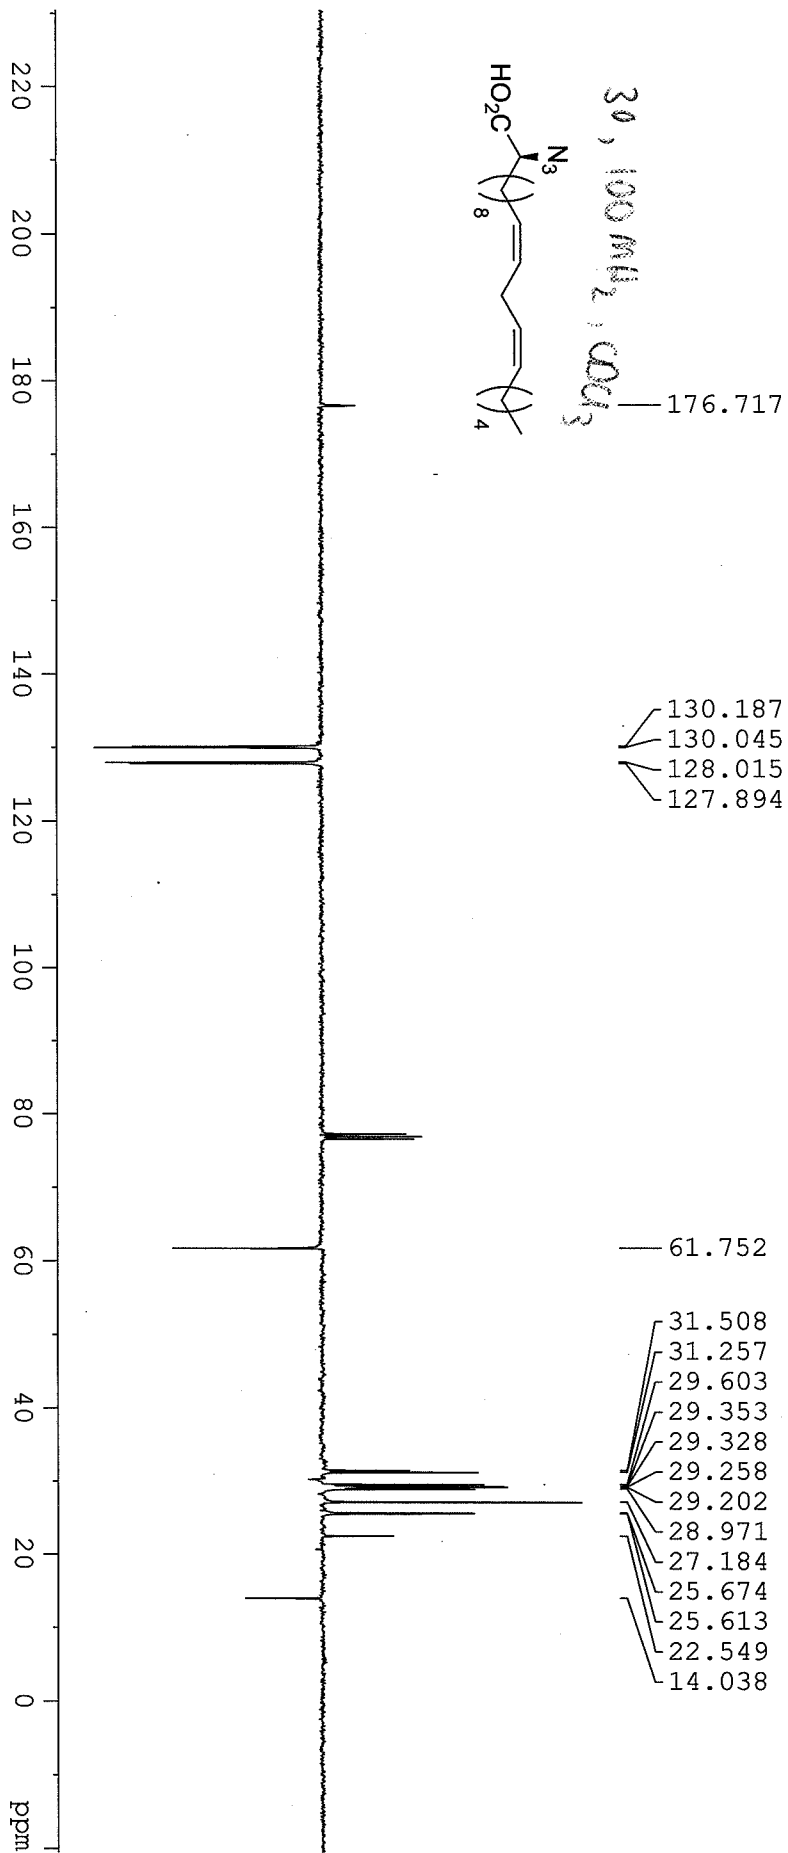

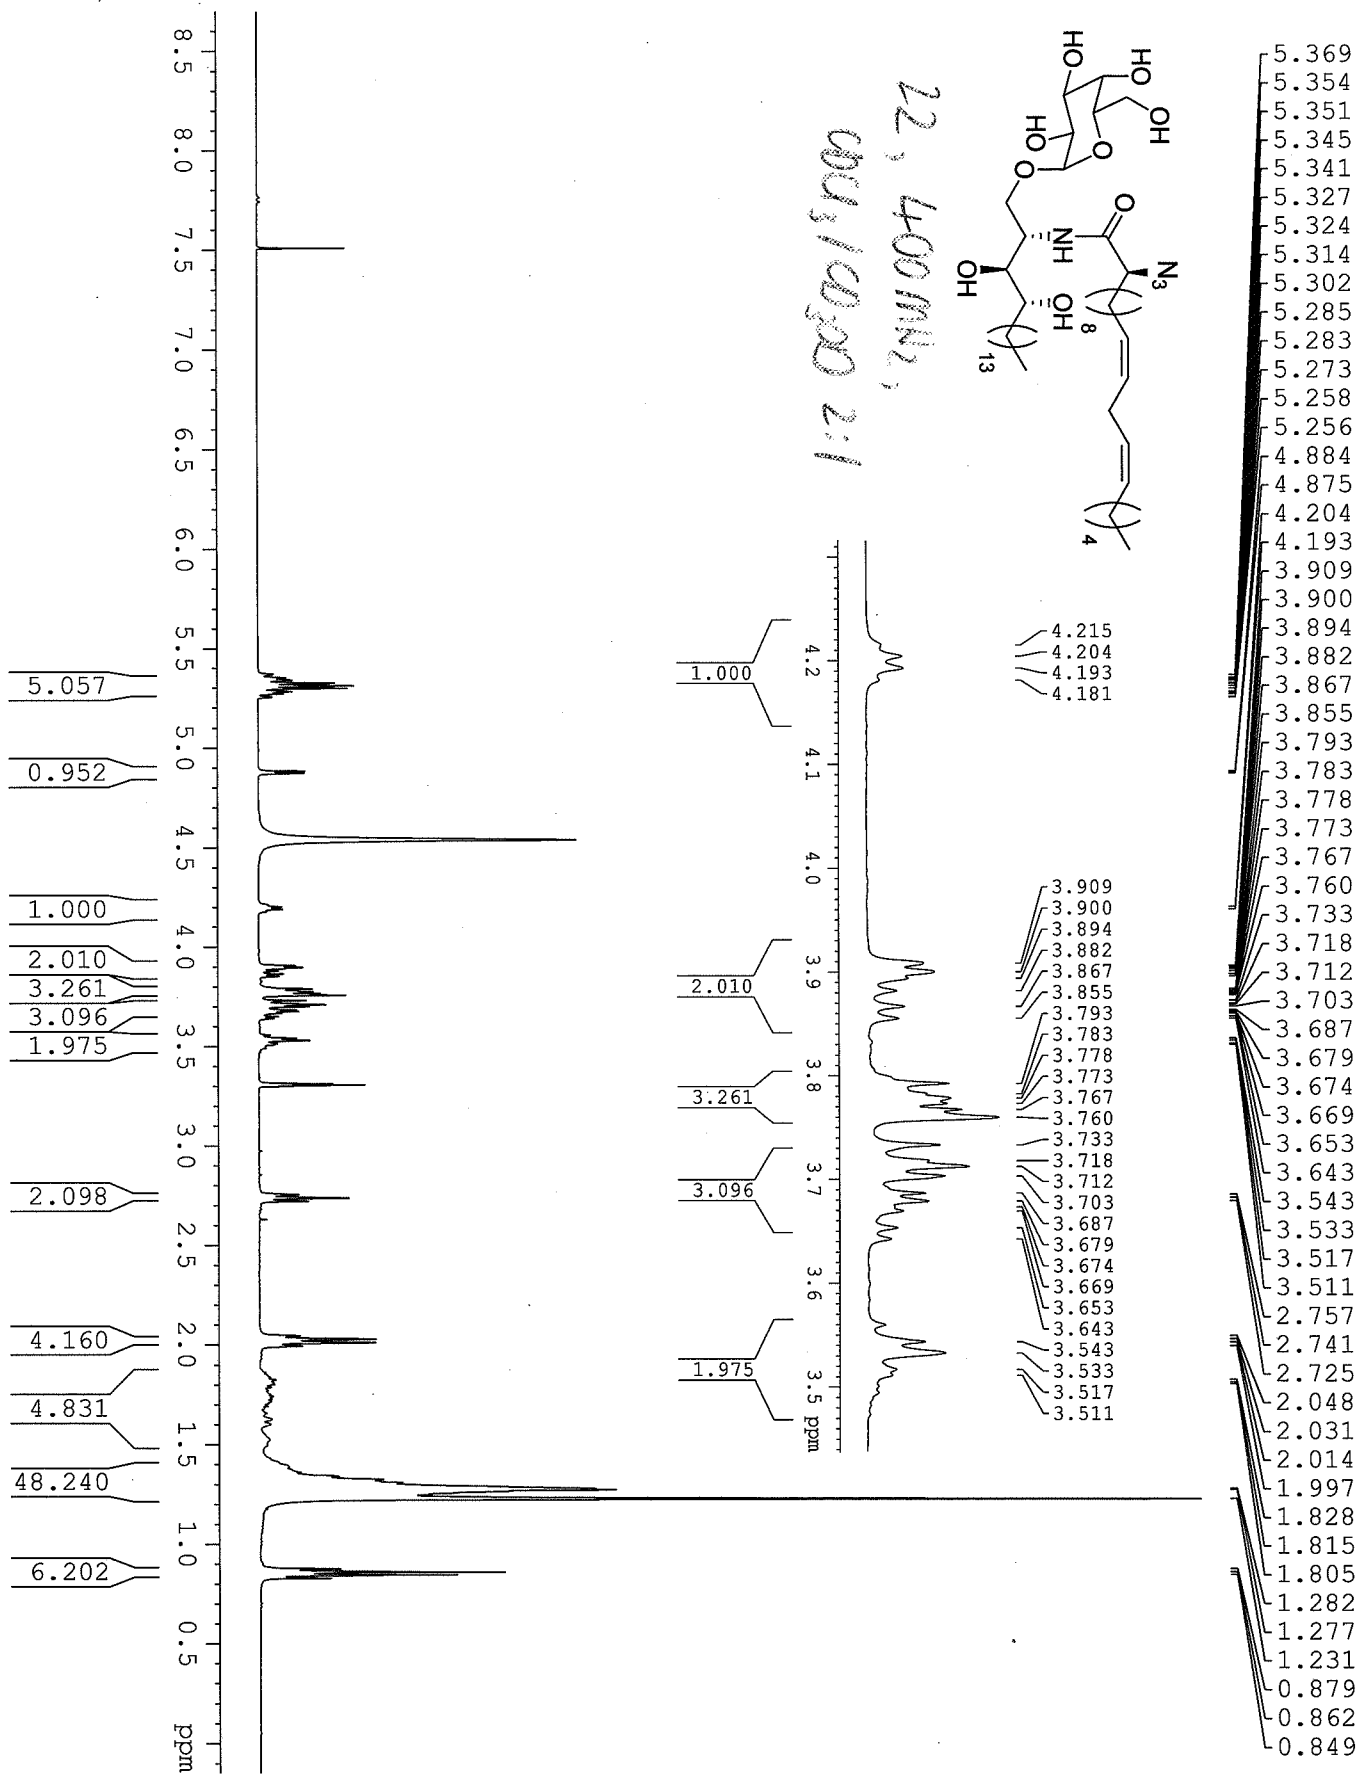

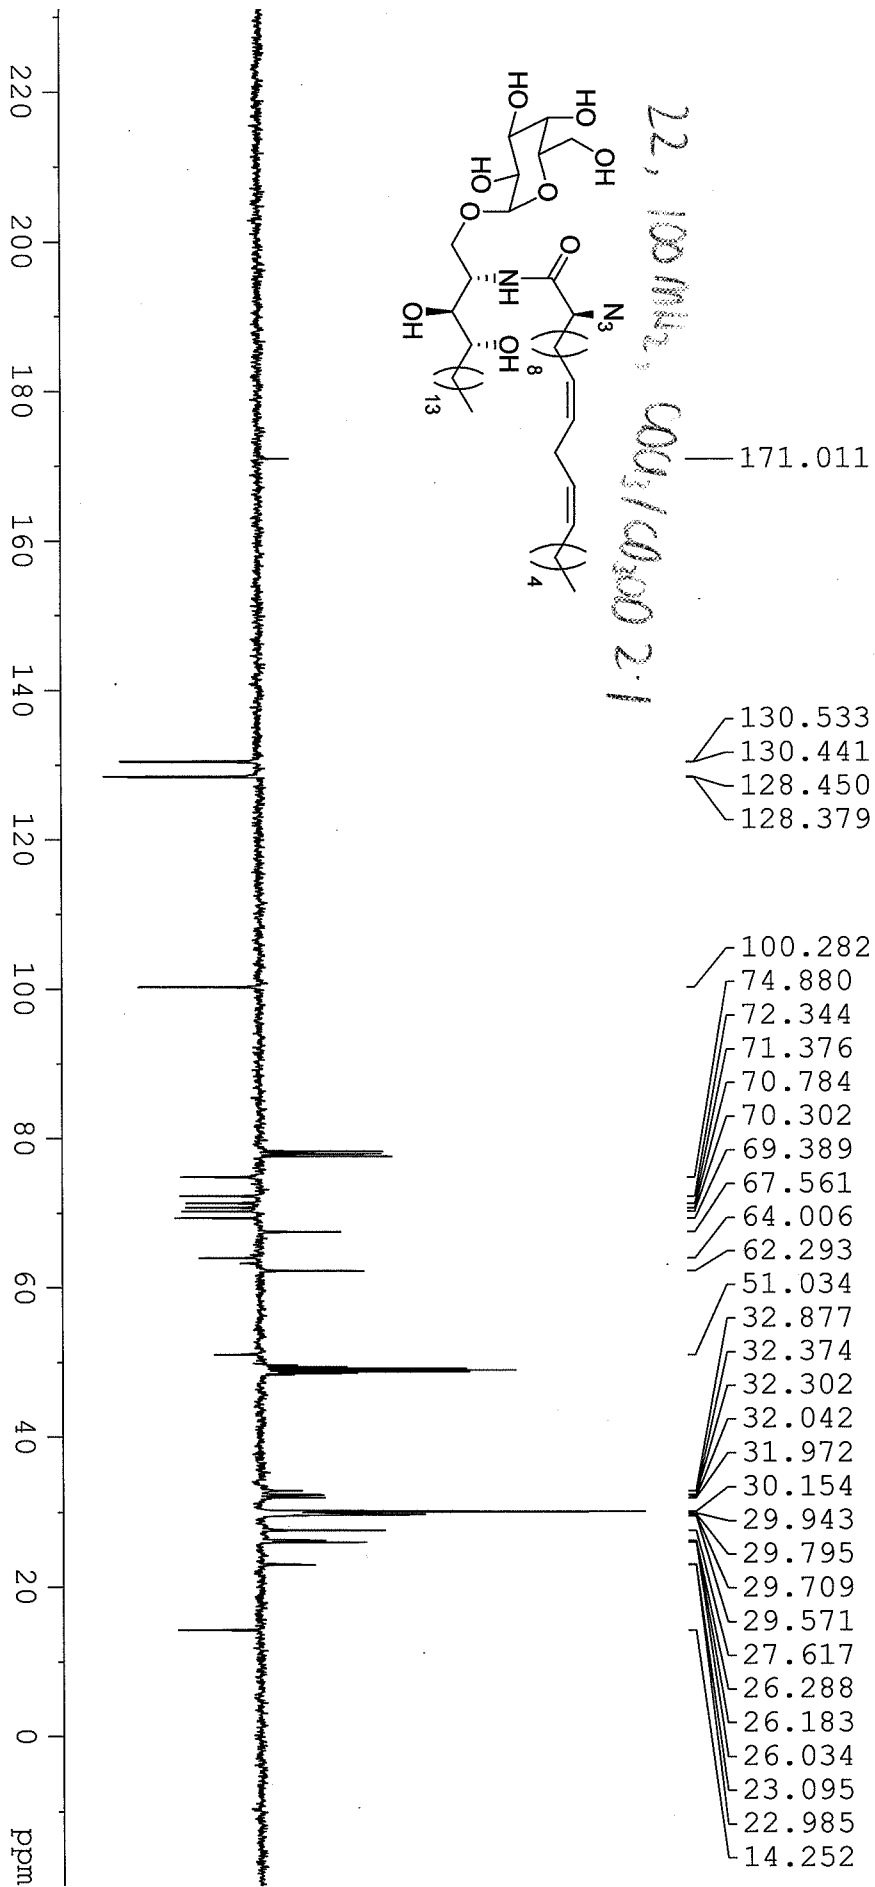

22, 400MHz,  
COCl<sub>2</sub>/CD<sub>2</sub>Cl<sub>2</sub> 2:1

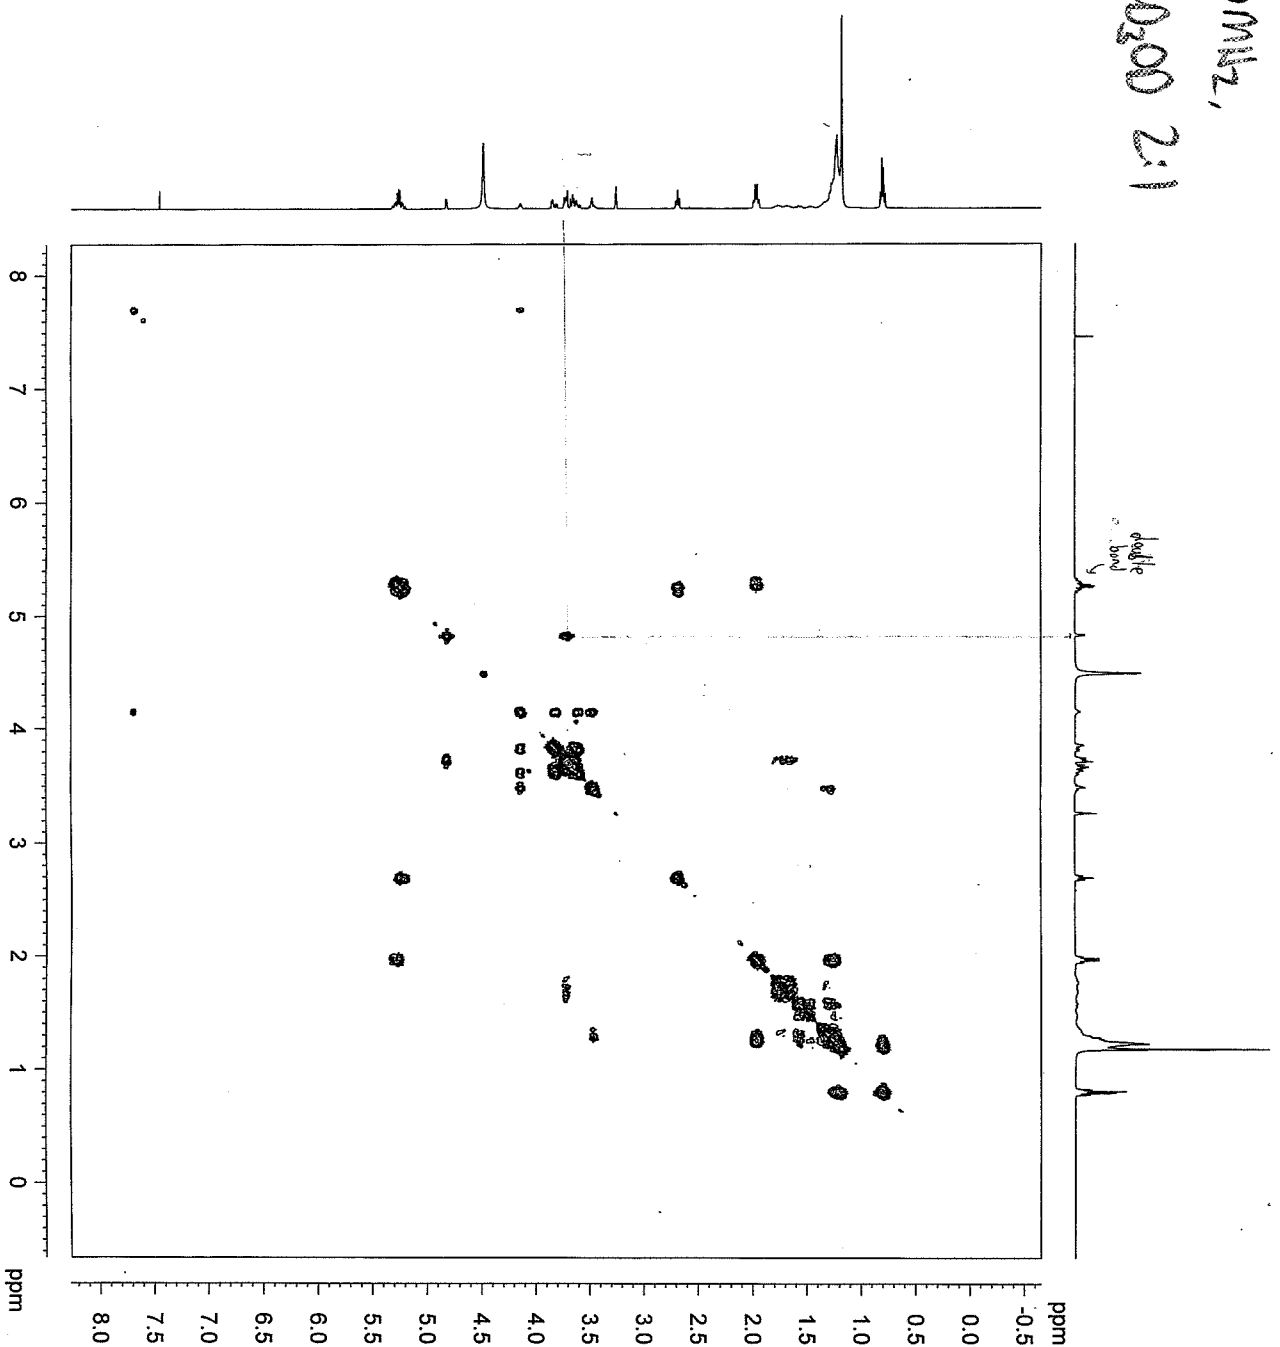

NAME 03-15-Beyra-10  
 EXPNO 11  
 PROCNO 20120315  
 Date\_ 2032  
 Time\_ 20:32  
 INSTRUM spect  
 PROBHD 5 mm PABLI 13C  
 PULPROG csgyprntcf  
 TD 1024  
 SOLVENT MeOD  
 NS 4  
 DS 16  
 SWH 3571.428 Hz  
 FIDRES 3.487723 Hz  
 AQ 0.1434100 sec  
 RG 2050  
 DW 140.000 usec  
 DE 6.50 usec  
 TE 298.5 K  
 D0 0.00000300 sec  
 D1 1.43337802 sec  
 D18 0.00000400 sec  
 D19 0.00020000 sec  
 INO 0.00028000 sec

===== CHANNEL f1 =====  
 NUC1 1H  
 P1 9.50 usec  
 PL1 -4.00 dB  
 PL1W 24.29165867 W  
 SFO1 400.1315930 MHz

===== GRADIENT CHANNEL =====  
 GPNAM1 SINE.100  
 GPNAM2 SINE.100  
 GPNAM3 SINE.100  
 GPZ1 16.00 %  
 GPZ2 12.00 %  
 GPZ3 40.00 %  
 P16 1000.00 usec  
 NDO 1  
 SFO1 298.5 K  
 ENDRES 400.3168 MHz  
 SIV 13929.6582 Hz  
 SIV 8329.0 Ppm  
 FMODE 1024  
 SF 400.1300296 MHz  
 WDW SINE  
 SSB 0  
 LB 0.00 Hz  
 GB 0  
 PC 1.40  
 SI 512  
 MC2 QF  
 SF 400.1300296 MHz  
 WDW SINE  
 SSB 0  
 LB 0.00 Hz  
 GB 0

22, 400 MHz,  
CDCl<sub>3</sub>/CD<sub>2</sub>O 2:1

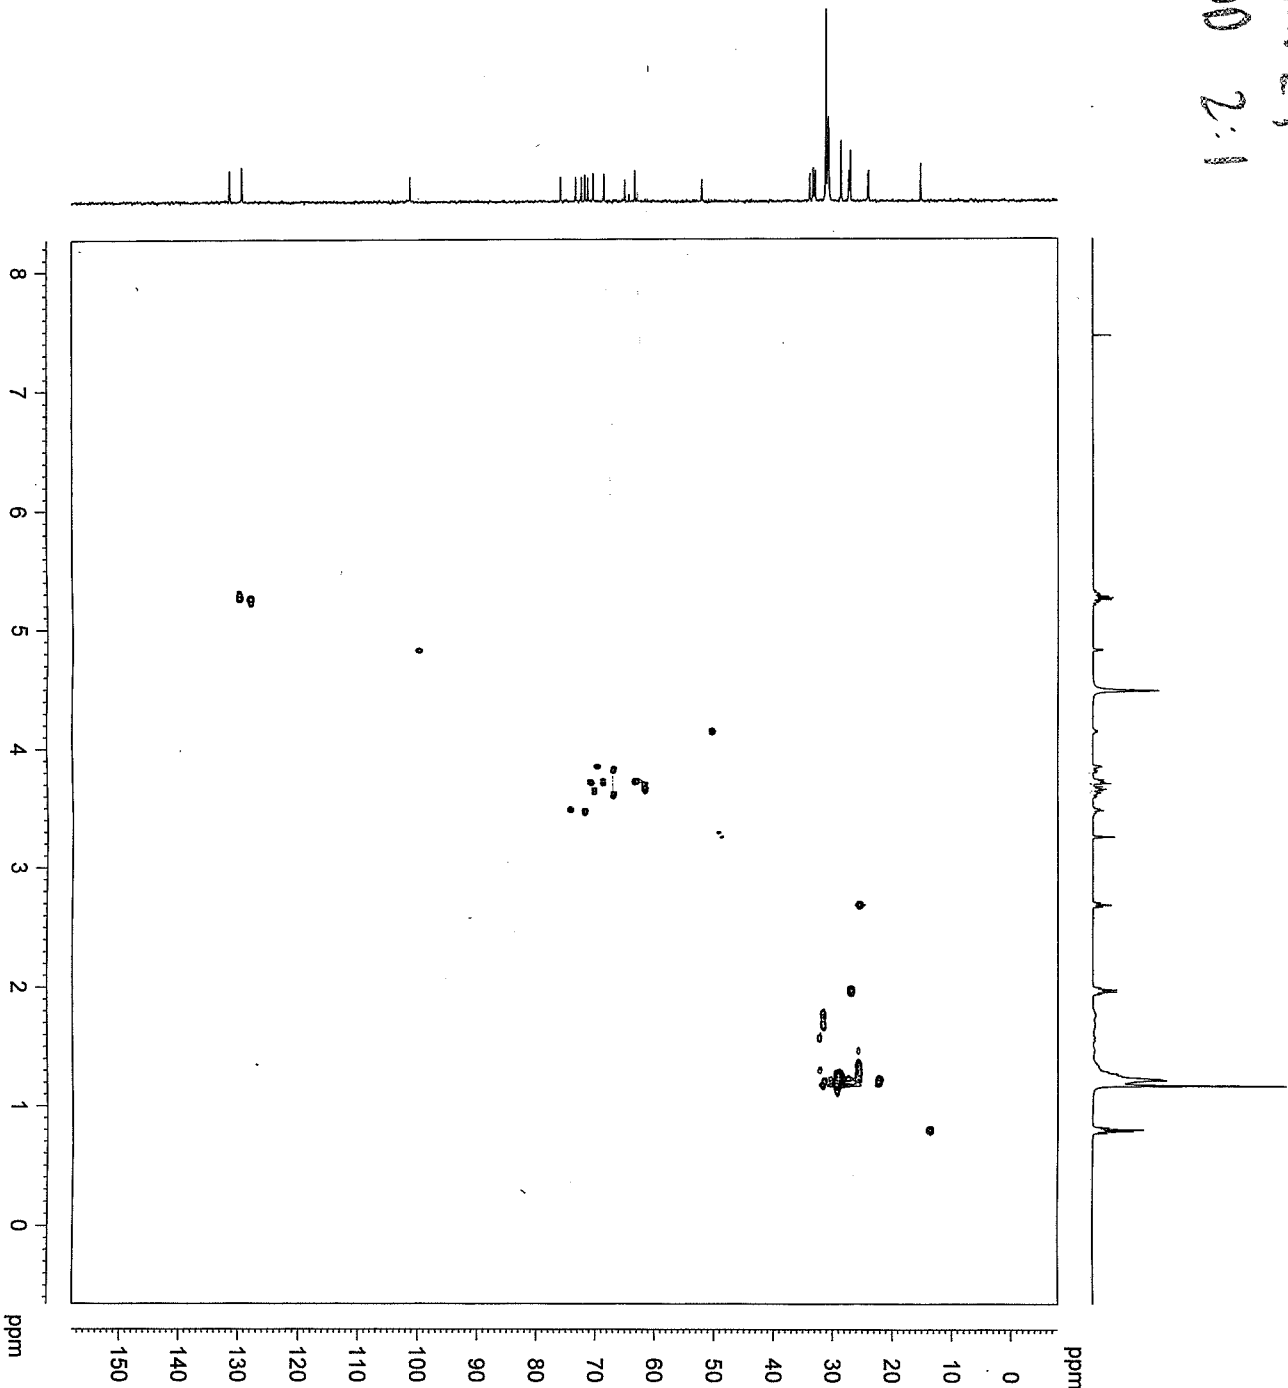

NAME 03-15-Besra-10  
 EXPNO 13  
 PROCNO 1  
 Date\_ 20120315  
 Time 21:22  
 INSTRUM spect  
 PROBD 5 mm PABUL 13C  
 PULPROG hsbcetgp  
 TD 1024  
 SOLVENT MeOD  
 NS 4  
 DS 16  
 SFO1 367.428 Hz  
 FIDRES 3.487723 Hz  
 AQ 0.1434700 sec  
 RG 2050  
 DW 140.000 usec  
 DE 6.50 usec  
 TE 297.0 K  
 CNST2 460.000000  
 D0 0.00000000 sec  
 D1 1.46290003 sec  
 D4 0.00172414 sec  
 D13 0.03000000 sec  
 D16 0.00000000 sec  
 INO 0.00003000 sec  
 ZSOP1NS

==== CHANNEL f1 =====  
 NUC1 1H  
 P1 9.50 usec  
 P2 19.00 usec  
 P28 0.00 usec  
 PL1 -4.00 dB  
 PL1W 24.29185867 W  
 SFO1 400.1315530 MHz

==== CHANNEL f2 =====  
 CPDPRG2 yamp  
 NUC2 13C  
 P3 8.80 usec  
 P4 17.80 usec  
 POPD2 78.00 usec  
 PL2 -3.00 dB  
 PL2W 58.16300007 W  
 PL12W 0.73822010 W  
 SFO2 100.6203124 MHz

==== GRADIENT CHANNEL =====  
 GPNAM1 SINE 100  
 GPNAM2 SINE 100  
 GEZ1 50.00 %  
 GEZ2 50.00 %  
 P16 1000.00 usec  
 NDO 2  
 TD 256  
 SFO1 100.6203 MHz  
 FIDRES 65.108421 Hz  
 SIV 165.650 ppm  
 RMODE Echo-Antiecho  
 SE 100  
 WDW COSINE  
 SSB 2  
 LB 0.00 Hz  
 GB 0  
 PC 1.40  
 SFC 512  
 NUC2 echo-antiecho  
 SFO1 100.612690 MHz  
 VDW COSINE  
 SSB 0  
 LB 0  
 GB 0

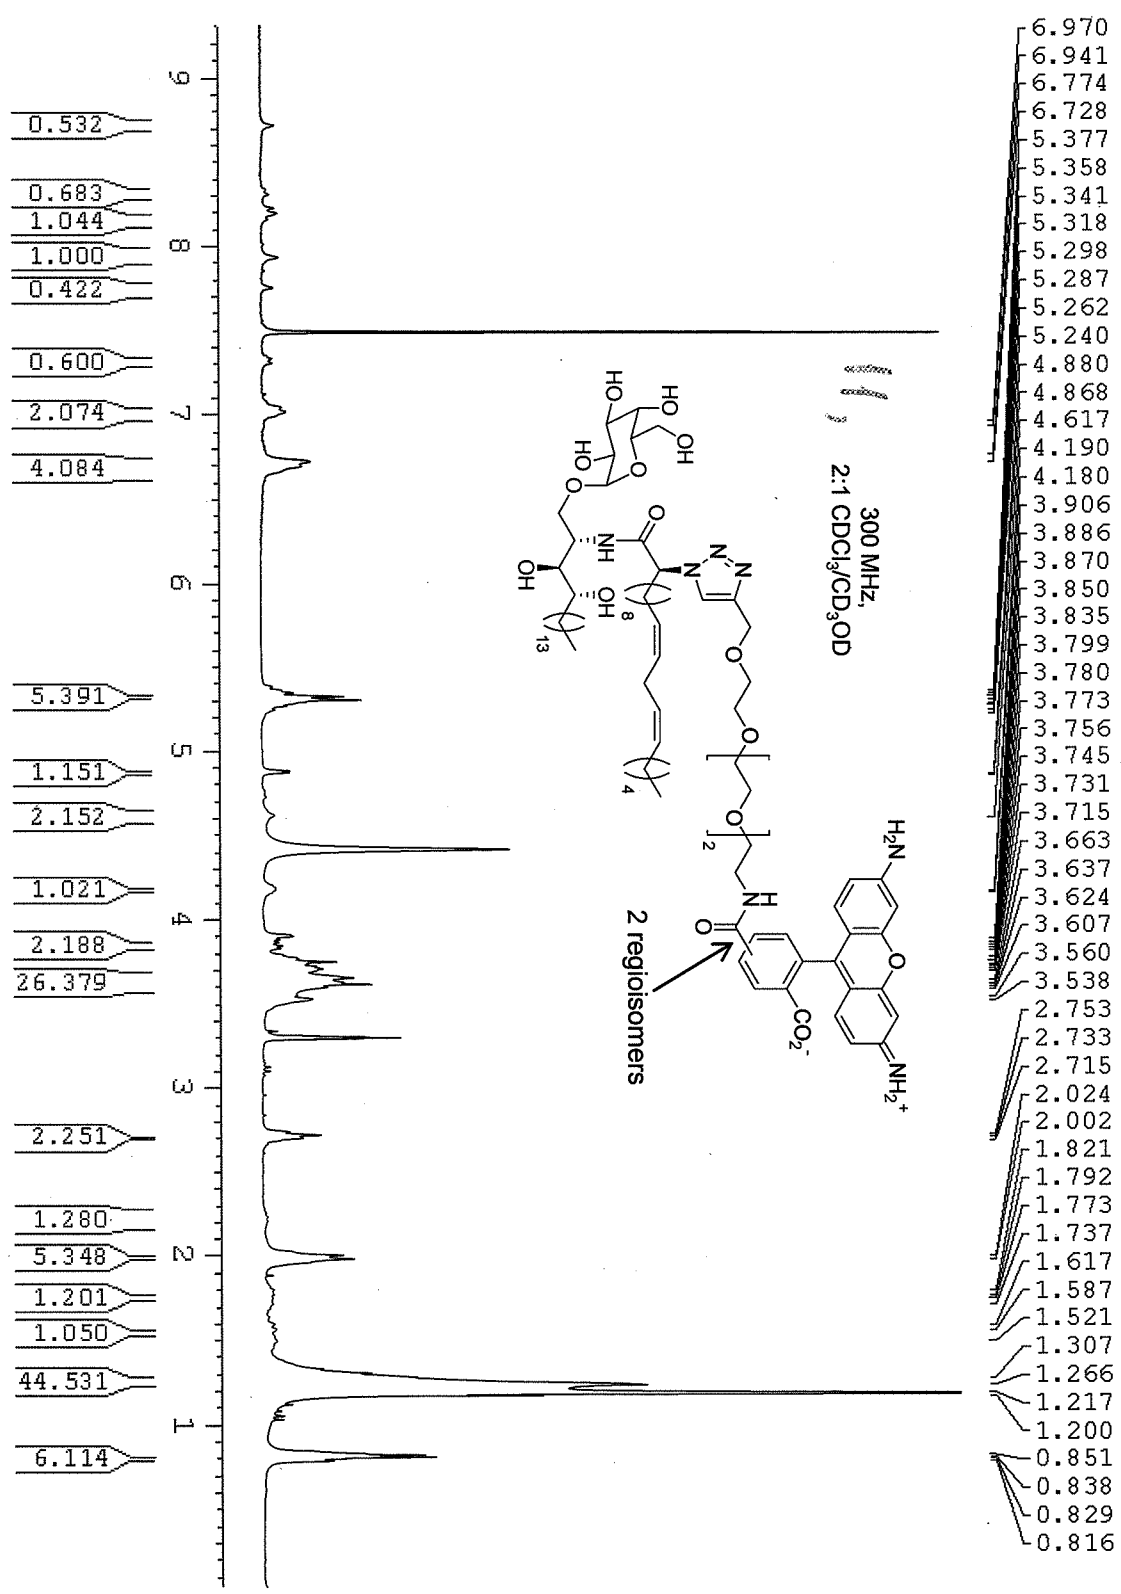

Supplement: bc300556e_si_005.pdf [file bc300556e_si_005.pdf]
