# Supplementary material
Source: PubMed Central journal article supplement (PMC3630740)
Supplement: bc300556e_si_001.pdf [file bc300556e_si_001.pdf]

# Design, Synthesis and Functional Activity of Labeled CD1d Glycolipid Agonists

*Peter J. Jervis,<sup>†‡#</sup> Paolo Polzella,<sup>§#</sup> Justyna Wojno,<sup>†‡¶</sup> John-Paul Jukes,<sup>§</sup> Hemza Ghadbane,<sup>§</sup> Yoel R.*

*Garcia Diaz,<sup>†‡f</sup> Gurdyal S. Besra,<sup>‡\*</sup> Vincenzo Cerundolo,<sup>§\*</sup> and Liam R. Cox<sup>†\*</sup>*

<sup>†</sup>School of Chemistry, University of Birmingham, Edgbaston, Birmingham, B15 2TT, U. K. <sup>‡</sup>School of Biosciences, University of Birmingham, Edgbaston, Birmingham, B15 2TT, U. K. <sup>§</sup>Medical Research Council Human Immunology Unit, Nuffield Department of Medicine, Weatherall Institute of Molecular Medicine, University of Oxford, Oxford, OX3 9DS, U. K.

<sup>#</sup>These authors contributed equally to this work

[vincenzo.cerundolo@imm.ox.ac.uk](mailto:vincenzo.cerundolo@imm.ox.ac.uk); [g.besra@bham.ac.uk](mailto:g.besra@bham.ac.uk); [l.r.cox@bham.ac.uk](mailto:l.r.cox@bham.ac.uk)

## Supporting Information I

|                                                                                                                                                                                                                                    |     |
|------------------------------------------------------------------------------------------------------------------------------------------------------------------------------------------------------------------------------------|-----|
| Chemistry                                                                                                                                                                                                                          | S5  |
| General Experimental                                                                                                                                                                                                               | S5  |
| Experimental Procedures and compound characterization                                                                                                                                                                              | S6  |
| Synthesis of (2 <i>S</i> , 3 <i>S</i> , 4 <i>R</i> )-2-azido-1- <i>O</i> -[2', 3'- <i>O</i> -isopropylidene-L-threitol]-3, 4- <i>O</i> -isopropylidene-octadecane-1, 3, 4-triol ( <b>25</b> )                                      | S6  |
| Synthesis of (2 <i>S</i> , 3 <i>S</i> , 4 <i>R</i> )-2-azido-1- <i>O</i> -[L-threitol]octadecane-1, 3, 4-triol ( <b>26</b> )                                                                                                       | S7  |
| Synthesis of (2 <i>S</i> , 3 <i>S</i> , 4 <i>R</i> )-2-amino-1- <i>O</i> -[L-threitol]octadecane-1, 3, 4-triol ( <b>16</b> )                                                                                                       | S7  |
| Synthesis of (2 <i>R</i> , 5 <i>S</i> )-2-isopropyl-3, 6-dimethoxy-5-tetracosanyl-2, 5-dihydropyrazine ( <b>13a</b> ) and (2 <i>R</i> , 5 <i>R</i> )-2-isopropyl-3, 6-dimethoxy-5-tetracosanyl-2, 5-dihydropyrazine ( <b>13b</b> ) | S8  |
| Synthesis of (2 <i>S</i> )-methyl 2-aminohexacosanoate ( <b>14</b> )                                                                                                                                                               | S9  |
| Synthesis of (2 <i>S</i> )-methyl 2-azidohexacosanoate                                                                                                                                                                             | S10 |
| Synthesis of (2 <i>S</i> )-2-azidohexacosanoic acid [( <i>S</i> )- <b>15</b> ]                                                                                                                                                     | S11 |
| Synthesis of (2 <i>S</i> , 3 <i>S</i> , 4 <i>R</i> , 2'' <i>S</i> )-2-[2''-azidohexacosanoylamino]-1- <i>O</i> -[L-threitol]octadecane-1, 3, 4-triol [( <i>S</i> )- <b>17</b> ]                                                    | S11 |
| Synthesis of 3-(2'-(2''-(2'''-amide-D-biotin-ethoxy)ethoxy)ethoxy)prop-1-yne ( <b>18</b> )                                                                                                                                         | S12 |
| Synthesis of (2'' <i>S</i> )-biotinylated ThrCer [( <i>S</i> )- <b>10</b> ]                                                                                                                                                        | S13 |
| Synthesis of ( <i>rac</i> )-2-azidohexacosanoic acid ( <i>rac</i> - <b>15</b> )                                                                                                                                                    | S15 |
| Synthesis of (2 <i>S</i> , 3 <i>S</i> , 4 <i>R</i> , 2'' <i>R,S</i> )-2-[2''-azidohexacosanoylamino]-1- <i>O</i> -[L-threitol]octadecane-1, 3, 4-triol ( <b>17</b> ) (1:1 mixture of epimers, epimeric at C(2''))                  | S16 |
| Synthesis of biotinylated ThrCer ( <b>10</b> ) [1:1 mixture of epimers, epimeric at C(2'')]                                                                                                                                        | S17 |
| Synthesis of labeled glycolipid <b>11</b>                                                                                                                                                                                          | S19 |
| Synthesis of (2 <i>R</i> , 5 <i>S</i> , 9' <i>Z</i> , 12' <i>Z</i> )-isopropyl-3, 6-dimethoxy-5-(octadeca-9', 12'-dienyl)-2, 5-dihydropyrazine ( <b>27</b> )                                                                       | S20 |

|                                                                                                                                                                                                                                   |     |
|-----------------------------------------------------------------------------------------------------------------------------------------------------------------------------------------------------------------------------------|-----|
| Synthesis of (2 <i>S</i> , 11 <i>Z</i> , 14 <i>Z</i> )-methyl 2-aminoeicosa-(11, 14)-dienoate ( <b>28</b> )                                                                                                                       | S21 |
| Synthesis of (2 <i>S</i> , 11 <i>Z</i> , 14 <i>Z</i> )-methyl 2-azidoeicosa-(11, 14)-dienoate ( <b>29</b> )                                                                                                                       | S22 |
| Synthesis of (2 <i>S</i> , 11 <i>Z</i> , 14 <i>Z</i> )-2-azidoeicosa-(11, 14)-dienoic acid ( <b>30</b> )                                                                                                                          | S23 |
| Synthesis of $\alpha$ -D-galactopyranosyl-1- <i>O</i> -phytosphingosine ( <b>20</b> )                                                                                                                                             | S24 |
| Synthesis of (2 <i>S</i> , 3 <i>S</i> , 4 <i>R</i> , 2' <i>S</i> , 11' <i>Z</i> , 14' <i>Z</i> )-2-[2'-azidoeicosa-(11', 14')-dienoylamino]-1- <i>O</i> -<br>[ $\alpha$ -D-galactopyranose]octadecane-1, 3, 4-triol ( <b>22</b> ) | S24 |
| Synthesis of Fluor 488-labeled $\alpha$ -GalCer ( <b>11</b> ) [1:1, mixture of regioisomers in the label]                                                                                                                         | S26 |
| References                                                                                                                                                                                                                        | S27 |
| Statistical analysis of data summarized in Figure 3                                                                                                                                                                               | S28 |
| <b>Supporting Information II Scanned Spectra</b>                                                                                                                                                                                  | S29 |
| Scanned NMR spectra for (2 <i>S</i> , 3 <i>S</i> , 4 <i>R</i> )-2-azido-1- <i>O</i> -[2', 3'- <i>O</i> -isopropylidene-L-threitol]-<br>3, 4- <i>O</i> -isopropylidene-octadecane-1, 3, 4-triol ( <b>25</b> )                      | S30 |
| Scanned NMR spectra for (2 <i>S</i> , 3 <i>S</i> , 4 <i>R</i> )-2-azido-1- <i>O</i> -[L-threitol]<br>octadecane-1, 3, 4-triol ( <b>26</b> )                                                                                       | S32 |
| Scanned NMR spectra for (2 <i>R</i> , 5 <i>S</i> )-2-isopropyl-3, 6-dimethoxy-5-tetracosanyl-<br>2, 5-dihydropyrazine ( <b>13a</b> )                                                                                              | S34 |
| Scanned NMR spectra for (2 <i>R</i> , 5 <i>R</i> )-2-isopropyl-3, 6-dimethoxy-5-tetracosanyl-<br>2, 5-dihydropyrazine ( <b>13b</b> )                                                                                              | S36 |
| Scanned NMR spectra for (2 <i>S</i> )-methyl 2-aminohexacosanoate ( <b>14</b> )                                                                                                                                                   | S38 |
| Scanned NMR spectra for (2 <i>S</i> )-methyl 2-azidohexacosanoate                                                                                                                                                                 | S40 |
| Scanned NMR spectra for (2 <i>S</i> )-2-azidohexacosanoic acid [( <i>S</i> )- <b>15</b> ]                                                                                                                                         | S42 |
| Scanned NMR spectra for ( <i>rac</i> )-2-bromohexacosanoic acid                                                                                                                                                                   | S44 |

Scanned NMR spectra for (2*S*, 3*S*, 4*R*, 2''*S*)-2-[2''-azidohexacosanoylamino]-1-*O*-[L-threitol] octadecane-1, 3, 4-triol [(*S*)-**17**] + comparison with epimeric mixture S46

### Supporting Information III Scanned Spectra S48

Scanned NMR spectra for 3-(2'-((2''-(2'''-amide-D-biotin-ethoxy)ethoxy)ethoxy) prop-1-yne (**18**) S49

Scanned NMR spectra for (2''*R*)-biotinylated ThrCer [(*R*)-**10**] S53

Scanned Mass Spectrum for (2''*R*)-biotinylated ThrCer [(*R*)-**10**] S71

### Supporting Information IV Scanned Spectra S73

Scanned NMR spectra for (2''*S*)-biotinylated ThrCer [(*S*)-**10**] and comparison of [(*S*)-**10**] with [(*R*)-**10**] and epimeric mixture S74

Scanned Mass Spectrum for (2''*S*)-biotinylated ThrCer [(*S*)-**10**] S92

### Supporting Information V Scanned Spectra S94

Scanned NMR spectra for (2*R*, 5*S*, 9'*Z*, 12'*Z*)-isopropyl-3, 6-dimethoxy-5-(octadeca-9', 12'-dienyl)-2, 5-dihydropyrazine (**27**) S95

Scanned NMR spectra for (2*S*, 11*Z*, 14*Z*)-methyl 2-aminoeicosa-(11, 14)-dienoate (**28**) S97

Scanned NMR spectra for (2*S*, 11*Z*, 14*Z*)-methyl 2-azidoeicosa-(11, 14)-dienoate (**29**) S99

Scanned NMR spectra for (2*S*, 11*Z*, 14*Z*)-2-azidoeicosa-(11, 14)-dienoic acid (**30**) S101

Scanned NMR spectra for (2*S*, 3*S*, 4*R*, 2'*S*, 11'*Z*, 14'*Z*)-2-[2'-azidoeicosa-(11', 14')-dienoylamino]-1-*O*-[α-D-galactopyranose]octadecane-1, 3, 4-triol (**22**) S103

Scanned NMR spectra for Fluor 488-labeled α-GalCer (**11**) [1:1, mixture of regioisomers in the label] S107

# Chemistry

## General Experimental

Melting points were determined using open capillaries and are uncorrected. Infrared spectra were recorded either neat or as thin films between NaCl discs. The intensity of each band is described as s (strong), m (medium) or w (weak), and with the prefix v (very) and suffix br (broad) where appropriate. <sup>1</sup>H-NMR spectra were recorded at 500 MHz, 400 MHz, or 300 MHz. <sup>13</sup>C-NMR spectra were recorded at 125 MHz, 100 MHz, or 75 MHz. Chemical shifts are reported as  $\delta$  values (ppm) referenced to the following solvent signals: CHCl<sub>3</sub>,  $\delta_H$  7.26; CDCl<sub>3</sub>,  $\delta_C$  77.0; CH<sub>3</sub>OH,  $\delta_H$  3.34; CD<sub>3</sub>OD,  $\delta_C$  49.9. The term "stack" is used to describe a region where resonances arising from non-equivalent nuclei are coincident, and multiplet, m, to describe a resonance arising from a single nucleus (or equivalent nuclei) but where coupling constants cannot be readily assigned. Mass spectra were recorded utilizing electrospray ionization (and a MeOH mobile phase), and are reported as (*m/z* (%)). HRMS were recorded using a lock mass incorporated into the mobile phase.

All reagents were obtained from commercial sources and used without further purification unless stated otherwise. Anhydrous solvents were stored over 4 Å molecular sieves and under an Ar atmosphere. All solutions are aqueous and saturated unless stated otherwise.

All reactions were monitored by TLC using pre-coated aluminum-backed ICN silica plates (60A F<sub>254</sub>) and visualized by UV detection (at 254 nm) and staining with 5% phosphomolybdic acid in EtOH (MPA spray). Column chromatography was performed on silica gel (particle size 40-63  $\mu$ m mesh).

## Experimental Procedures and compound characterization

### Synthesis of Amine 16:

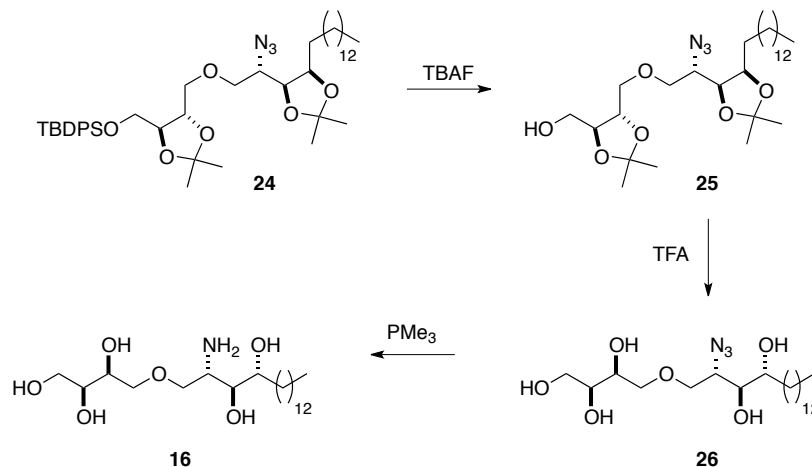

### (2*S*, 3*S*, 4*R*)-2-Azido-1-*O*-[2', 3'-*O*-isopropylidene-*L*-threitol]-3, 4-*O*-isopropylidene-octadecane-1, 3, 4-triol (25)

Bu<sub>4</sub>NF (1.0 M solution in THF, 1.1 mL, 1.1 mmol) was added to a solution of silyl ether **24**<sup>[11]</sup> (750 mg, 0.98 mmol) in THF (10 mL) at r.t. After 4 h, NH<sub>4</sub>Cl solution (10 mL) was added. The phases were separated and the aqueous phase was extracted with CH<sub>2</sub>Cl<sub>2</sub> (3 × 10 mL). The solvent was removed under reduced pressure and the residue was purified by flash column chromatography (25% EtOAc in hexanes) to provide alcohol **25** as a colorless oil (490 mg, 95%); *R*<sub>f</sub> = 0.35 (30% EtOAc in hexane); [α]<sub>D</sub><sup>21</sup> = 22.0 (*c* 1, CHCl<sub>3</sub>); ν<sub>max</sub>(film) / cm<sup>-1</sup> 3487br (O–H), 2098s (N<sub>3</sub>); δ<sub>H</sub>(300 MHz, CDCl<sub>3</sub>) 0.87 (t, *J* 6.2, 3H), 1.22–1.34 (stack, 25H), 1.40–1.45 (stack, 9H), 1.46–1.65 (stack, 4H), 1.99 (dd, *J* 7.8, 4.8, 1H), 3.51–4.18 (broad stack, 11H); δ<sub>C</sub>(100 MHz, CDCl<sub>3</sub>) 14.1 (CH<sub>3</sub>), 22.7 (CH<sub>2</sub>), 25.6 (CH<sub>3</sub>), 26.4 (CH<sub>2</sub>), 27.0 (CH<sub>3</sub>, resonance overlap), 28.1 (CH<sub>3</sub>), [29.4, 29.6 (CH<sub>2</sub>, some resonance overlap)], 31.9

(CH<sub>2</sub>), 59.9 (CH), 62.3 (CH<sub>2</sub>), 71.9 (CH<sub>2</sub>), 72.9 (CH<sub>2</sub>), 75.6 (CH), 76.0 (CH), 77.8 (CH), 79.4 (CH), 108.3 (C), 109.4 (C); MS (TOF ES+) *m/z* 550.5 ([M + Na]<sup>+</sup>, 100%); HRMS (TOF ES+) calcd for C<sub>28</sub>H<sub>53</sub>N<sub>3</sub>O<sub>6</sub>Na [M + Na]<sup>+</sup> 550.3832, found 550.3853.

**(2S, 3S, 4R)-2-Azido-1-O-[L-threitol]octadecane-1, 3, 4-triol (26)**

TFA (2.00 mL) was added over 1 min to alcohol **25** (400 mg, 0.76 mmol). After stirring for 1 h at r.t., the reaction mixture was concentrated under reduced pressure and the residual TFA was removed by co-evaporation with Et<sub>2</sub>O (3 × 10 mL) to provide crude pentaol **26** as a white solid (315 mg, quant.), which was sufficiently pure to be used in the next step without further purification; *R<sub>f</sub>* = 0.23 (10% MeOH in CHCl<sub>3</sub>); [α]<sub>D</sub><sup>21</sup> = +29.2 (*c* 1, CHCl<sub>3</sub>); *v*<sub>max</sub>(film) / cm<sup>-1</sup> 3306s br (O–H), 2095s (N<sub>3</sub>); δ<sub>H</sub>(300 MHz, CDCl<sub>3</sub>) 0.85 (t, *J* 6.6, 3H), 1.13–1.41 (stack, 24H), 1.44–1.70 (stack, 2H), 3.52–3.70 (stack, 8H), 3.71–3.91 (stack, 3H), exchangeable hydrogens not observed; δ<sub>C</sub>(100 MHz, CDCl<sub>3</sub>) 14.3 (CH<sub>3</sub>), 23.1 (CH<sub>2</sub>), 26.2 (CH<sub>2</sub>), [29.8, 30.1, 32.6, 32.7 (CH<sub>2</sub>, some resonance overlap)], 62.6 (CH), 63.9 (CH<sub>2</sub>), 70.7 (CH), 71.2 (CH<sub>2</sub>), 72.2 (CH), 72.3 (CH), 73.0 (CH<sub>2</sub>), 74.5 (CH); MS (TOF ES+) *m/z* 470.1 ([M + Na]<sup>+</sup>, 100%); HRMS (TOF ES+) calcd for C<sub>22</sub>H<sub>45</sub>N<sub>3</sub>NaO<sub>6</sub> [M + Na]<sup>+</sup> 470.3206, found 470.3197.

**(2S, 3S, 4R)-2-Amino-1-O-[L-threitol]octadecane-1, 3, 4-triol (16)**

PMe<sub>3</sub> (0.29 mL of a 1.0 M solution in THF, 0.29 mmol) was added dropwise over 5 min to a solution of azide **26** (100 mg, 0.24 mmol) in THF/H<sub>2</sub>O (3 mL, 15:1). The reaction mixture was stirred at r.t. for 4 h and then concentrated under reduced pressure. The residual H<sub>2</sub>O was removed by co-evaporation

with toluene (3 × 10 mL) to provide amine **16** as a white solid (88 mg, 94%), which was used directly in the next step without further purification.

**(2*R*, 5*S*)-2-Isopropyl-3, 6-dimethoxy-5-tetracosanyl-2, 5-dihydropyrazine (13a) and (2*R*, 5*R*)-2-isopropyl-3, 6-dimethoxy-5-tetracosanyl-2, 5-dihydropyrazine (13b)**

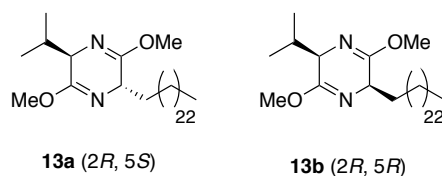

A solution of BuLi (2.5 M in hexane, 52  $\mu$ L, 0.13 mmol) was added dropwise over 1 min to a stirred solution of commercially available (2*R*)-2-isopropyl-3,6-dimethoxy-2,5-dihydropyrazine **12** (23  $\mu$ L, 0.13 mmol) in THF (1 mL) at  $-78$   $^{\circ}$ C. Stirring was continued at this temperature for 45 min before a solution of 1-iodotetracosane<sup>[21]</sup> (60 mg, 0.13 mmol) in THF (1 mL) was added over 5 min. The reaction mixture was then stirred for 24 h, slowly warming to r.t. The reaction was quenched by the addition of  $\text{NH}_4\text{Cl}$  solution (5 mL) and EtOAc (5 mL) and the phases were separated. The aqueous phase was extracted with EtOAc (3 × 5 mL) and the combined organic extracts were washed with brine (20 mL), dried ( $\text{MgSO}_4$ ), filtered and concentrated under reduced pressure to afford a mixture of dihydropyrazine diastereoisomers ((2*R*, 5*S*)-diastereoisomer (**13a**) : (2*R*, 5*R*)-diastereoisomer (**13b**), 15:1). Purification of this mixture by flash column chromatography (3% EtOAc in hexane) afforded, in order of elution, the major (2*R*, 5*S*)-dihydropyrazine, **13a**, as a white solid (60 mg, 87%);  $R_f = 0.29$  (3% EtOAc in hexane);  $[\alpha]_D^{21} = -2.3$  ( $c$  1,  $\text{CHCl}_3$ ); mp  $78 - 79$   $^{\circ}$ C;  $\nu_{\text{max}}$ (film) /  $\text{cm}^{-1}$  1694s (C=N);  $\delta_{\text{H}}$ (300 MHz,  $\text{CDCl}_3$ ) 0.68 (d,  $J$  6.9, 3H), 0.88 (t,  $J$  6.8, 3H), 1.05 (d,  $J$  6.9, 3H), 1.17–1.40 (stack, 44H), 1.61–



1.86 (stack, 2H), 2.27 (septet of doublets,  $J$  6.9, 3.3, 1H), 3.68 (s, 3H), 3.69 (s, 3H), 3.93 (app. t,  $J$  3.3, 1H), 4.03 (dt,  $J$  5.7, 3.3, 1H);  $\delta_{\text{C}}$ (100 MHz,  $\text{CDCl}_3$ ) 14.1 ( $\text{CH}_3$ ), 16.5 ( $\text{CH}_3$ ), 19.1 ( $\text{CH}_3$ ), 19.1 ( $\text{CH}_2$ ), 22.7 ( $\text{CH}_2$ ), 24.4 ( $\text{CH}_2$ ), [29.4, 29.5, 29.6, 29.7, 31.9, 34.1 ( $\text{CH}_2$ , some resonance overlap)], 31.6 (CH), 52.28 ( $\text{CH}_3$ ), 52.33 ( $\text{CH}_3$ ), 55.5 (CH), 66.7 (CH), 163.4 (C), 164.0 (C); MS (TOF ES+)  $m/z$  521.5 ( $[\text{M} + \text{H}]^+$ , 100%); HRMS (TOF ES+) calcd for  $\text{C}_{33}\text{H}_{65}\text{N}_2\text{O}_2$   $[\text{M} + \text{H}]^+$  521.5046, found 521.5050; and then the minor (2*R*, 5*R*)-dihydropyrazine, **13b**, as a white solid (4 mg, 6%);  $R_f$  = 0.24 (3% EtOAc in hexane);  $[\alpha]_{\text{D}}^{21} = -12.7$  ( $c$  1,  $\text{CHCl}_3$ ); mp 74 – 75 °C;  $\nu_{\text{max}}$ (film) /  $\text{cm}^{-1}$  1694s (C=N);  $\delta_{\text{H}}$ (300 MHz,  $\text{CDCl}_3$ ) 0.74 (d,  $J$  6.9, 3H), 0.88 (t,  $J$  6.8, 3H), 1.06 (d,  $J$  6.9, 3H), 1.18–1.36 (stack, 42H), 1.37–1.52 (stack, 3H), 1.81–1.90 (m, 1H), 2.21 (septet of doublets,  $J$  6.9, 3.0, 1H), 3.68 (s, 6H), 3.90–4.12 (stack, 2H);  $\delta_{\text{C}}$ (100 MHz,  $\text{CDCl}_3$ ) 14.1 ( $\text{CH}_3$ ), 17.6 ( $\text{CH}_3$ ), 19.6 ( $\text{CH}_3$ ), 22.7 ( $\text{CH}_2$ ), 26.1 ( $\text{CH}_2$ ), [29.4, 29.5, 29.7, 31.9, 36.6 ( $\text{CH}_2$ , some resonance overlap)], 31.5 (CH), 52.4 ( $\text{CH}_3$ , resonance overlap), 55.8 (CH), 60.9 (CH), quaternary carbon resonances were not observed; MS (TOF ES+)  $m/z$  521.5 ( $[\text{M} + \text{H}]^+$ , 100%); HRMS (TOF ES+) calcd for  $\text{C}_{33}\text{H}_{65}\text{N}_2\text{O}_2$   $[\text{M} + \text{H}]^+$  521.5046, found 521.5048.

#### (2*S*)-Methyl 2-aminohexacosanoate (**14**)

Hydrochloric acid (0.64 mL, 1.0 M solution, 0.64 mmol) was added to a vigorously stirred solution of dihydropyrazine **13a** (55 mg, 0.105 mmol) in THF (2 mL) at r.t. After 4 h, the mixture was cooled to 0 °C and quenched with NaOH solution (0.32 mL, 2.0 M solution, 0.64 mmol). EtOAc (5 mL) and  $\text{H}_2\text{O}$  (5 mL) were added and the phases were separated. The aqueous phase was extracted with EtOAc (3 × 5 mL). The combined organic extracts were washed with brine (20 mL), dried ( $\text{MgSO}_4$ ), filtered and concentrated under reduced pressure. The residue was purified by flash column chromatography (5% MeOH in  $\text{CHCl}_3$ ) to afford amino ester **14** as a white solid (32 mg, 72%);  $R_f$  = 0.22 (5% MeOH in

CHCl<sub>3</sub>);  $[\alpha]_D^{21} = +24.3$  (*c* 1, CHCl<sub>3</sub>); mp 95 – 97 °C;  $\nu_{\max}$ (film) / cm<sup>-1</sup> 3370s br (NH<sub>2</sub>), 1746s (C=O);  $\delta_H$ (300 MHz, CDCl<sub>3</sub>) 0.86 (t, *J* 6.6, 3H), 1.15–1.42 (stack, 44H), 1.49–1.62 (m, 1H), 1.51–1.78 (m, 1H), 3.43 (dd, *J* 7.2, 5.4, 1H), 3.71 (s, 3H);  $\delta_C$ (100 MHz, CDCl<sub>3</sub>) 14.1 (CH<sub>3</sub>), 22.7 (CH<sub>2</sub>), 25.6 (CH<sub>2</sub>), [29.37, 29.44, 29.5, 29.7, 31.9, 35.0 (CH<sub>2</sub>, some resonance overlap)], 51.8 (CH<sub>3</sub>), 54.5 (CH), 176.7 (C); MS (TOF ES+) *m/z* 426.4 ([M + H]<sup>+</sup>, 100%); HRMS (TOF ES+) calcd for C<sub>27</sub>H<sub>56</sub>NO<sub>2</sub> [M + H]<sup>+</sup> 426.4311, found 426.4313.

### **(2*S*)-Methyl 2-azidohexacosanoate**

Amino ester **14** (32 mg, 0.075 mmol) was dissolved in MeOH/CH<sub>2</sub>Cl<sub>2</sub>/H<sub>2</sub>O (4 mL, 2:1:1). K<sub>2</sub>CO<sub>3</sub> (79 mg, 0.74 mmol), CuSO<sub>4</sub> (168 μg, 1.1 μmol) and imidazole-1-sulfonyl azide<sup>[3]</sup> (88 mg, 0.42 mmol) were added sequentially. The reaction mixture was stirred overnight and then diluted with EtOAc (15 mL) and H<sub>2</sub>O (15 mL). The phases were separated and the aqueous phase was extracted with EtOAc (3 × 15 mL). The combined organic extracts were washed with brine (60 mL), dried (MgSO<sub>4</sub>), filtered and concentrated under reduced pressure. Purification of the residue by flash column chromatography (3% EtOAc in hexane) provided (2*S*)-methyl 2-azidohexacosanoate as a white solid (26 mg, 77%); *R<sub>f</sub>* = 0.27 (3% EtOAc in hexane);  $[\alpha]_D^{21} = +17.8$  (*c* 1, CHCl<sub>3</sub>); mp 69 – 70 °C;  $\nu_{\max}$ (film) / cm<sup>-1</sup> 2106s (N<sub>3</sub>), 1745s (C=O);  $\delta_H$ (300 MHz, CDCl<sub>3</sub>) 0.88 (t, *J* 6.6, 3H), 1.16–1.49 (stack, 44H), 1.68–1.90 (stack, 2H), 3.79 (s, 3H), 3.80–3.86 (m, 1H);  $\delta_C$ (100 MHz, CDCl<sub>3</sub>) 14.1 (CH<sub>3</sub>), 22.7 (CH<sub>2</sub>), 25.7 (CH<sub>2</sub>), [29.0, 29.3, 29.5, 29.7, 31.4, 31.9 (CH<sub>2</sub>, some resonance overlap)], 52.5 (CH<sub>3</sub>), 62.0 (CH), 171.2 (C); MS (TOF ES+) *m/z* 474.4 ([M + Na]<sup>+</sup>, 100%); HRMS (TOF ES+) calcd for C<sub>27</sub>H<sub>53</sub>N<sub>3</sub>NaO<sub>2</sub> [M + Na]<sup>+</sup> 474.4035, found 474.4031.

### **(2S)-2-Azidohexacosanoic acid [(S)-15]**

LiOH·H<sub>2</sub>O (9.2 mg, 0.22 mmol) was added to a vigorously stirred solution of (2S)-methyl 2-azidohexacosanoate (25 mg, 0.055 mmol) in THF/H<sub>2</sub>O (1:1, 2 mL) at r.t. After stirring for 1 h, the mixture was cooled to 0 °C and quenched by the addition of hydrochloric acid (10 mL, 0.5 M solution). EtOAc (10 mL) was added and the phases were separated. The aqueous phase was extracted with EtOAc (3 × 10 mL) and the combined organic phases were washed with brine (40 mL), dried (MgSO<sub>4</sub>), filtered and concentrated under reduced pressure. Purification of the residue by flash column chromatography (60% EtOAc in hexane) afforded carboxylic acid **(S)-15** as a white solid (22 mg, 93%); *R<sub>f</sub>* = 0.2 (30% EtOAc in hexane); [α]<sub>D</sub><sup>21</sup> = -15.5 (*c* 1, CHCl<sub>3</sub>); mp 77 – 78 °C; *v*<sub>max</sub>(neat) / cm<sup>-1</sup> 3300-2600 w v br (O-H), 2124 m (N<sub>3</sub>), 1717 m (C=O); δ<sub>H</sub>(300 MHz, CDCl<sub>3</sub>) 0.88 (t, *J* 6.9, 3H), 1.19–1.40 (stack, 41H), 1.41–1.54 (stack, 3H), 1.72–1.96 (stack, 2H), 3.89 (dd, *J* 8.3, 5.2, 1H), *OH* resonance not observed; δ<sub>C</sub>(100 MHz, CDCl<sub>3</sub>) 14.1 (CH<sub>3</sub>), 22.7 (CH<sub>2</sub>), 25.7 (CH<sub>2</sub>), 29.1 (CH<sub>2</sub>), [29.4, 29.5, 29.7 (CH<sub>2</sub>, significant resonance overlap)], 31.3 (CH<sub>2</sub>), 32.0 (CH<sub>2</sub>), 61.9 (CH), 176.6 (C); MS (TOF ES-) *m/z* 436.4 ([M – H]<sup>-</sup>, 100%); HRMS (TOF ES-) calcd for C<sub>26</sub>H<sub>50</sub>N<sub>3</sub>O<sub>2</sub> [M – H]<sup>-</sup> 436.3903, found 436.3920.

### **(2S, 3S, 4R, 2''S)-2-[2''-Azidohexacosanoylamino]-1-O-[L-threitol]octadecane-1, 3, 4-triol [(S)-17]**

A solution of azido acid **(S)-15** (20 mg, 0.046 mmol) in (COCl)<sub>2</sub> (1.00 mL) was stirred at 70 °C for 2 h, after which time, the solution was cooled to r.t, and the (COCl)<sub>2</sub> was removed under a stream of dry argon. The residual volatiles were removed under reduced pressure. The resulting crude acyl chloride was dissolved in THF (1 mL) and added, with vigorous stirring, to a solution of amine **16** (18 mg,

0.046 mmol) in THF / NaOAc<sub>(aq)</sub> (8 M) (2 mL, 1:1). Vigorous stirring was maintained for 2 h, after which time, the mixture was left to stand and the phases were separated. The aqueous phase was extracted with THF (2 × 1 mL), and the combined organic phases were evaporated under reduced pressure. Purification of the residue by flash column chromatography (10% MeOH in CHCl<sub>3</sub>) afforded amide (**S**)-**17** as a white solid (29 mg, 74%); *R<sub>f</sub>* = 0.30 (10% MeOH in CHCl<sub>3</sub>); the poor solubility of this amphiphilic compound at r.t. prevented us from obtaining reliable optical rotation data; mp 109 – 111 °C;  $\nu_{\text{max}}$ (film) / cm<sup>-1</sup> 3305br m (O–H, N–H), 2103m (N<sub>3</sub>), 1653m (C=O);  $\delta_{\text{H}}$ (300 MHz, CDCl<sub>3</sub>/CD<sub>3</sub>OD, 2:1) 0.84 (t, *J* 6.9, 6H), 1.17–1.44 (stack, 70H), 1.71–1.89 (stack, 2H), 3.47–3.64 (stack, 8H), 3.68–3.83 (stack, 3H), 4.18 (app. q, *J* 4.4, 1H), 7.69 (d, *J* 9.0, 1H), OHs not observed;  $\delta_{\text{C}}$ (100 MHz, CDCl<sub>3</sub>/CD<sub>3</sub>OD, 2:1) 14.2 (CH<sub>3</sub>), 23.0 (CH<sub>2</sub>), 25.9 (CH<sub>2</sub>), 26.2 (CH<sub>2</sub>), [29.6, 29.7, 29.8, 30.0, 32.2, 32.9 (CH<sub>2</sub>, some resonance overlap)], 50.5 (CH), 63.8 (CH<sub>2</sub>), 63.9 (CH), 70.5 (CH<sub>2</sub>), 70.6 (CH), 72.2 (CH), 72.6 (CH), 73.2 (CH<sub>2</sub>), 74.9 (CH), 170.8 (C); MS (TOF ES+) *m/z* 864.0 ([M + Na]<sup>+</sup>, 100%); HRMS (TOF ES+) calcd for C<sub>48</sub>H<sub>96</sub>N<sub>4</sub>NaO<sub>7</sub> [M + Na]<sup>+</sup> 863.7177, found 863.7213.

### 3-(2'-(2''-(2'''-Amide-D-biotin-ethoxy)ethoxy)ethoxy)prop-1-yne (**18**)

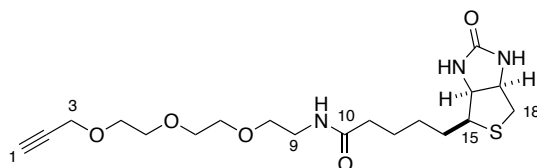

PMe<sub>3</sub> (0.34 mL of a 1.0 M solution in THF, 0.34 mmol) was added dropwise over 5 min to a solution of 3-(2'-(2''-(2'''-azidoethoxy)ethoxy)ethoxy)prop-1-yne<sup>[41]</sup> (60 mg, 0.28 mmol) in THF/H<sub>2</sub>O (3 mL, 15:1). The reaction mixture was stirred at r.t. for 4 h and then concentrated under reduced pressure.

The residual H<sub>2</sub>O was removed by co-evaporation with toluene (3 × 10 mL) to provide the corresponding amine as a white solid. The crude amine was dissolved in DMF (3 mL) before (+)-biotin *N*-hydroxysuccinimide ester (96 mg, 0.28 mmol) was added. The reaction mixture was stirred for 12 h at r.t. and then the volatiles were removed under reduced pressure. Purification of the residue by flash column chromatography (5% MeOH in CHCl<sub>3</sub>) provided the amide **18** as a colorless paste (90 mg, 78%); *R<sub>f</sub>* = 0.36 (5% MeOH in CHCl<sub>3</sub>);  $\nu_{\max}$ (film) / cm<sup>-1</sup> 3306s (N–H / ≡C–H), 2251w (C≡C), 1701s (C=O), 1654m (C=O);  $\delta_{\text{H}}$ (500 MHz, CDCl<sub>3</sub>) 1.38 (app. quintet, *J* 7.2, 2H, C(13)*H*<sub>2</sub>), 1.57–1.73 (stack, 4H, C(14)*H*<sub>2</sub>, C(12)*H*<sub>2</sub>), 2.17 (t, *J* 7.6, 2H, C(11)*H*<sub>2</sub>), 2.43 (t, *J* 2.2, 1H, C(1)*H*), 2.68 (app. d, *J* 12.7, 1H, C(18)*H*<sub>a</sub>*H*<sub>b</sub>), 2.84 (dd, *J* 12.7, 4.8, 1H, C(18)*H*<sub>a</sub>*H*<sub>b</sub>), 3.08–3.15 (m, 1H, C(15)*H*), 3.37–3.41 (m, 2H, C(9)*H*<sub>2</sub>), 3.51 (t, *J* 5.1, 2H, C(8)*H*<sub>2</sub>), 3.56–3.59 (stack, 4H, C(6)*H*<sub>2</sub>, C(7)*H*<sub>2</sub>), 3.60–3.65 (stack, 4H, C(5)*H*<sub>2</sub>, C(4)*H*<sub>2</sub>), 4.14 (d, *J* 2.2, 2H, C(3)*H*<sub>2</sub>), 4.24–4.26 (m, 1H, C(16)*H*), 4.43–4.46 (m, 1H, C(17)*H*), 6.05 (s, 1H, C(17)*NH*), 6.81 (s, 1H, C(16)*NH*), 6.85 (t, *J* 5.4, 1H, C(9)*NH*);  $\delta_{\text{C}}$ (125 MHz, CDCl<sub>3</sub>) 25.5 (CH<sub>2</sub>, C(12)), 28.0 (CH<sub>2</sub>, C(14)), 28.2 (CH<sub>2</sub>, C(13)), 35.8 (CH<sub>2</sub>, C(11)), 39.0 (CH<sub>2</sub>, C(9)), 40.4 (CH<sub>2</sub>, C(18)), 55.6 (CH, C(15)), 58.2 (CH<sub>2</sub>, C(3)), 60.1 (CH, C(17)), 61.6 (CH, C(16)), 68.9 (CH<sub>2</sub>, C(4)), 69.8 (CH<sub>2</sub>, C(8)), 69.9 (CH<sub>2</sub>, C(7)), 70.1 (CH<sub>2</sub>, C(5)), 70.2 (CH<sub>2</sub>, C(6)), 74.6 (CH, C(1)), 79.4 (C, C(2)), 164.2 (C, NHC=ONH), 173.3 (C, C(10)); MS (TOF ES+) *m/z* 436.1 ([M + Na]<sup>+</sup>, 100%); HRMS (TOF ES+) calcd for C<sub>19</sub>H<sub>31</sub>N<sub>3</sub>NaO<sub>5</sub>S [M+Na]<sup>+</sup> 436.1882, found 436.1869.

### (2''S)-Biotinylated ThrCer [(S)-10]

CuSO<sub>4</sub> solution (12 μL of a 0.5 M solution, 6 μmol) and sodium ascorbate solution (26 μL of a 1.0 M solution, 26 μmol) were added to a solution of azide (S)-**17** (25 mg, 0.029 mmol) and alkyne **18** (13 mg, 0.029 mmol) in *t*-BuOH/H<sub>2</sub>O (1 mL, 1:1) at r.t. The reaction mixture was heated for 10 h at 50 °C

and then diluted with  $\text{CHCl}_3$  (10 mL), and washed with brine (3 mL). The phases were separated and the aqueous layer was extracted with  $\text{CHCl}_3$  ( $2 \times 5$  mL). The combined organic layers were dried over  $\text{Na}_2\text{SO}_4$  and the volatiles were removed under reduced pressure. Purification of the residue by flash column chromatography (10% MeOH in  $\text{CHCl}_3$ ) afforded triazole (**S**)-**10** as a white paste (28 mg, 77%);  $R_f = 0.20$  (10%  $\text{CH}_3\text{OH}$  in  $\text{CHCl}_3$ ); the poor solubility of this amphiphilic compound at r.t. prevented us from obtaining reliable optical rotation data;  $\nu_{\text{max}}$ (film) /  $\text{cm}^{-1}$  3332br (O–H, N–H), 1672s (C=O);  $\delta_{\text{H}}$ (500 MHz,  $\text{CDCl}_3/\text{CD}_3\text{OD}$ , 2:1) 0.84 (t,  $J$  6.9, 6H,  $2 \times \text{CH}_2\text{CH}_3$ ), 1.17–1.36 (stack, 70H), 1.38–1.46 (stack, 2H), 1.52–1.75 (stack, 4H, C(12'') $H_2$  (middle of stack), C(14'') $H_aH_b$  (LHS of stack), C(14'') $H_aH_b$  (RHS of stack)), 2.01–2.09 (stack, 1H, C(3'') $H_aH_b$ ), 2.10–2.22 (stack, 3H, C(3'') $H_aH_b$ , C(11'') $H_2$ ), 2.71 (d,  $J$  12.8, 1H, C(18'') $H_aH_b$ ), 2.89 (dd,  $J$  12.8, 5.0, 1H, C(18'') $H_aH_b$ ), 3.13–3.19 (m, 1H, C(15'') $H$ ), 3.33–3.38 (stack, 2H, C(9'') $H_2$ ), 3.47–3.71 (stack, 18H, including C(1) $H_aH_b$ , C(4'') $H_2$ ), 3.73 (dd,  $J$  10.0, 5.0, 1H, C(1) $H_aH_b$ ), 3.75–3.79 (m, 1H), 4.17–4.22 (m, 1H, C(2) $H$ ), 4.30 (d,  $J$  7.8, 4.3, 1H, C(16'') $H$ ), 4.48 (dd,  $J$  7.8, 4.8, 1H, C(17'') $H$ ), 4.65 (s, 2H, C(3'') $H_2$ ), 5.27 (dd,  $J$  8.5, 6.5, 1H, C(2'') $H$ ), 7.99 (s, 1H, C(1'') $H$ ), exchangeable hydrogens not observed;  $\delta_{\text{C}}$ (125 MHz,  $\text{CDCl}_3/\text{CD}_3\text{OD}$ , 2:1) 14.3 ( $\text{CH}_3$ , C(18), C(26'')) (resonance overlap), 23.2 ( $\text{CH}_2$ ), 26.1 ( $\text{CH}_2$ , C(12'')), 26.2 ( $\text{CH}_2$ ), 26.4 ( $\text{CH}_2$ ), 28.8 ( $\text{CH}_2$ , C(14'')), [29.1, 29.5, 29.87, 29.90, 30.1, 30.19, 30.22, 32.5 ( $\text{CH}_2$ , alkyl chain, some resonance overlap)], 36.2 ( $\text{CH}_2$ , C(11'')), 39.8 ( $\text{CH}_2$ , C(9'')), 40.8 ( $\text{CH}_2$ , C(18'')), 51.3 (CH, C(2)), 56.3 (CH, C(15'')), 60.9 (CH, C(17'')), 62.6 (CH, C(16'')), 63.9 ( $\text{CH}_2$ , C(4')), 64.7 (CH, C(2'')), 64.8 ( $\text{CH}_2$ , C(3'')), 70.17 ( $\text{CH}_2$ , C(4'')), 70.24 ( $\text{CH}_2$ ), 70.5 ( $\text{CH}_2$ ), 70.6 ( $\text{CH}_2$ ), 70.8 (CH), 70.99 ( $\text{CH}_2$ ), 71.03 ( $\text{CH}_2$ ), 72.5 (CH), 72.8 (CH), 73.4 ( $\text{CH}_2$ , C(1')), 75.0 (CH, C(3)), 123.3 (CH, C(1'')), 145.3 (C, C(2'')), 165.1 (C, NHC=ONH), 169.1 (C, C(1'')), 175.2 (C, C(10'')); MS (TOF ES+)  $m/z$  1276.8 ( $[\text{M} + \text{Na}]^+$ , 100%), 649.9 (7), 398.1 (5); HRMS (TOF ES+) calcd for  $\text{C}_{67}\text{H}_{127}\text{N}_7\text{O}_{12}\text{SNa}$   $[\text{M} + \text{Na}]^+$  1276.9161, found 1276.9166.

**(rac)-2-Azidohexacosanoic acid (rac-15)**

A mixture of hexacosanoic acid (600 mg, 1.51 mmol) and red phosphorus (47 mg, 1.5 mmol) was heated to 95 °C and Br<sub>2</sub> (270 μL, 5.29 mmol) was added dropwise over 2 min at this temperature with stirring. The mixture was stirred for 6 h and then cooled to r.t., diluted with Et<sub>2</sub>O (30 mL) and washed with H<sub>2</sub>O (30 mL). The aqueous phase was extracted with Et<sub>2</sub>O (2 × 30 mL), and the combined organic fractions were washed with brine (10 mL), dried with MgSO<sub>4</sub>, filtered and the solvent was removed under reduced pressure to yield 2-bromohexacosanoic acid as a white solid, which was recrystallized from hexane (481 mg, 67%); *R*<sub>f</sub> = 0.35 (30% EtOAc in hexane); mp 73 – 74 °C (from hexane);  $\nu_{\max}$ (film) / cm<sup>-1</sup> 3300–2600 w v br (O–H), 1715 m (C=O), 1697 s (C=O);  $\delta_{\text{H}}$  (300 MHz, CDCl<sub>3</sub>) 0.88 (t, *J* 6.8, 3H), 1.21–1.33 (stack, 44H), 1.95–2.21 (m, 2H), 4.24 (app t, *J* 7.6, 1H), *OH* not observed;  $\delta_{\text{C}}$  (100 MHz, CDCl<sub>3</sub>) 14.1 (CH<sub>3</sub>), 22.7 (CH<sub>2</sub>), 27.2 (CH<sub>2</sub>), 28.8 (CH<sub>2</sub>), [29.3, 29.4, 29.5, 29.7, 29.8 (CH<sub>2</sub>, resonance overlap)], 32.0 (CH<sub>2</sub>), 34.7 (CH<sub>2</sub>), 45.4 (CH), 176.0 (C); MS (TOF ES<sup>-</sup>) *m/z* 475.3 ([M(<sup>81</sup>Br isotopomer) – H]<sup>-</sup>, 100%), 473.3 (100, [M(<sup>79</sup>Br isotopomer) – H]<sup>-</sup>); HRMS (TOF ES<sup>-</sup>) calcd for C<sub>26</sub>H<sub>50</sub><sup>79</sup>BrO<sub>2</sub> [M – H]<sup>-</sup> 473.2994, found 473.2989.

NaN<sub>3</sub> (690 mg, 10.6 mmol) was added to a solution of 2-bromohexacosanoic acid (481 mg, 1.01 mmol) in DMF (5 mL). The reaction mixture was stirred vigorously at 60 °C. After 48 h, the reaction mixture was cooled to r.t., diluted with Et<sub>2</sub>O (20 mL) and washed with hydrochloric acid (50 mL, 1 M). The phases were separated and the aqueous phase was extracted with Et<sub>2</sub>O (2 × 25 mL). The combined organic fractions were washed with brine (20 mL) and dried with MgSO<sub>4</sub>. Removal of the volatiles under reduced pressure and purification of the residue by flash column chromatography (15% EtOAc in toluene) afforded racemic  $\alpha$ -azido acid **15** as a white solid (394 mg, 60% over 2 steps from

hexacosanoic acid). The  $^1\text{H}$  NMR,  $^{13}\text{C}$  NMR, IR spectroscopic and MS data were identical to those obtained for (2*S*)-2-azidohexacosanoic acid [(*S*)-**15**] (*vide supra*).

**(2*S*, 3*S*, 4*R*, 2''*R,S*)-2-[2''-Azidohexacosanoylamino]-1-*O*-[L-threitol]octadecane-1, 3, 4-triol (17)**  
(1:1 mixture of epimers, epimeric at C(2''))

A solution of *rac*-**15** (61 mg, 0.14 mmol) in  $(\text{COCl})_2$  (2.00 mL) was stirred at 70 °C for 2 h, after which time, the solution was cooled to r.t., and the remaining  $(\text{COCl})_2$  was removed under a stream of dry argon. The residual volatiles were removed under reduced pressure. The resulting crude acyl chloride was dissolved in THF (1.5 mL) and added, with vigorous stirring, to a solution of amine **16** (54 mg, 0.14 mmol) in THF /  $\text{NaOAc}_{(\text{aq})}$  (8 M) (1:1, 3 mL). Vigorous stirring was maintained for 2 h, after which time, the mixture was left to stand and the phases were separated. The aqueous phase was extracted with THF ( $2 \times 1.5$  mL), and the combined organic phases were evaporated under reduced pressure. Purification of the residue by flash column chromatography (10% MeOH in  $\text{CHCl}_3$ ) afforded amide **17** as a white solid (85 mg, 72%, 1:1 mixture of 2''-epimers). Data on mixture unless stated otherwise:  $R_f = 0.30$  (10% MeOH in  $\text{CHCl}_3$ ); mp 109 – 110 °C;  $\nu_{\text{max}}(\text{film}) / \text{cm}^{-1}$  3303br m (O–H, N–H), 2101m ( $\text{N}_3$ ), 1655m (C=O);  $\delta_{\text{H}}(300 \text{ MHz, CDCl}_3/\text{CD}_3\text{OD, 2:1})$  0.85 (t,  $J$  6.9, 6H), 1.17–1.54 (stack, 70H), 1.71–1.89 (stack, 2H), 3.46–3.64 (stack, 8H), 3.67–3.88 (stack, 3H), 4.15–4.26 (m, 1H);  $\delta_{\text{C}}(100 \text{ MHz, CDCl}_3/\text{CD}_3\text{OD, 2:1})$  14.2 ( $\text{CH}_3$ ), 23.0 ( $\text{CH}_2$ ), 25.9 ( $\text{CH}_2$ ), 26.0 ( $\text{CH}_2$ ), 26.3 ( $\text{CH}_2$ ), [29.6, 29.7, 29.8, 30.1, 32.3, 32.8 ( $\text{CH}_2$ , some resonance overlap)], 50.7 (CH), 63.8 ( $\text{CH}_2$ ), [63.9 (CH of (2''*S*)-epimer), 64.1 (CH of (2''*R*)-epimer)], 70.5 ( $\text{CH}_2$ ), 70.6 (CH), 72.3 (CH), 72.6 (CH), [73.20 ( $\text{CH}_2$  of (2''*S*)-epimer), 73.25 ( $\text{CH}_2$  of (2''*R*)-epimer)], 74.9 (CH), 170.9 (C); MS (TOF ES–)  $m/z$  839.7 ( $[\text{M} - \text{H}]^-$ , 100%), 812.0 (70); HRMS (TOF ES–) calcd for  $\text{C}_{48}\text{H}_{95}\text{N}_4\text{O}_7$   $[\text{M} - \text{H}]^-$  839.7201, found 839.7195.



**Biotinylated ThrCer (10) [1:1 mixture of epimers, epimeric at C(2'')]**

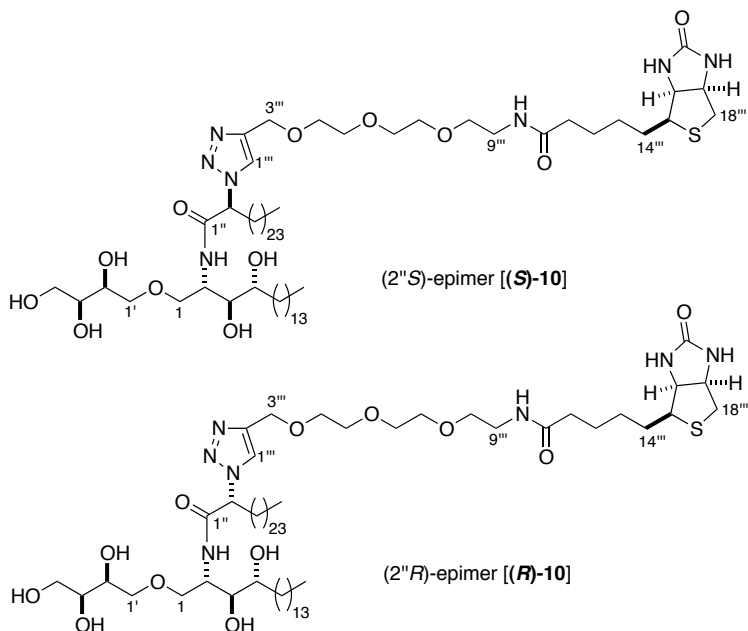

CuSO<sub>4</sub> solution (12 μL of a 0.5 M solution, 6 μmol) and sodium ascorbate solution (26 μL of a 1.0 M solution, 26 μmol) were added to a solution of azide **17** (1:1 mixture of 2''-epimers, (55 mg, 0.065 mmol) and alkyne **18** (27 mg, 0.065 mmol) in *t*-BuOH/H<sub>2</sub>O (1 mL, 1:1) at r.t. The reaction mixture was heated for 10 h at 50 °C and then diluted with CHCl<sub>3</sub> (10 mL), and washed with brine (3 mL). The phases were separated and the aqueous layer was extracted with CHCl<sub>3</sub> (2 × 5 mL). The combined organic layers were dried over Na<sub>2</sub>SO<sub>4</sub> and the volatiles were removed under reduced pressure. Purification of the residue by flash column chromatography (10% CH<sub>3</sub>OH in CHCl<sub>3</sub>) afforded biotinylated ThrCer **10** (64 mg, 78%, 1:1 mixture of 2''-epimers). Careful re-purification of a small sample of this mixture by flash column chromatography (gradient 3 – 8% CH<sub>3</sub>OH in CHCl<sub>3</sub>) afforded, in order of elution, (2''R)-**10** as a white paste; *R<sub>f</sub>* = 0.30 (10% CH<sub>3</sub>OH in CHCl<sub>3</sub>); *v*<sub>max</sub>(film) / cm<sup>-1</sup> 3333br (O–H, N–H), 1672s (C=O); δ<sub>H</sub>(500 MHz, CDCl<sub>3</sub>/CD<sub>3</sub>OD, 2:1) 0.84 (t, *J* 6.9, 6H, 2 × CH<sub>2</sub>CH<sub>3</sub>), 1.17–1.35 (stack, 70H), 1.36–1.45 (stack, 2H), 1.48–1.73 (stack, 4H, C(12''')H<sub>2</sub> (middle of stack),

$C(14''')H_aH_b$  (LHS of stack),  $C(14''')H_aH_b$  (RHS of stack)), 1.97–2.07 (stack, 1H,  $C(3'')H_aH_b$ ), 2.09–2.21 (stack, 3H,  $C(3'')H_aH_b$ ,  $C(11''')H_2$ ), 2.70 (d,  $J$  12.8, 1H,  $C(18''')H_aH_b$ ), 2.89 (dd,  $J$  12.8, 4.9, 1H,  $C(18''')H_aH_b$ ), 3.12–3.18 (m, 1H,  $C(15''')H$ ), 3.32–3.38 (m, 2H,  $C(9''')H_2$ ), 3.43–3.74 (stack, 20H), 4.12–4.17 (m, 1H,  $C(2)H$ ), 4.30 (dd,  $J$  8.0, 4.8, 1H,  $C(16''')H$ ), 4.48 (dd,  $J$  8.0, 4.8, 1H,  $C(17''')H$ ), 4.65 (s, 2H,  $C(3''')H_2$ ), 5.27 (dd,  $J$  8.5, 6.5, 1H,  $C(2'')H$ ), 8.00 (s, 1H,  $C(1'')H$ );  $\delta_c$ (125 MHz,  $CDCl_3/CD_3OD$ , 2:1) 14.2 ( $CH_3$ ,  $C(18)$ ,  $C(26'')$  (resonance overlap)), 23.0 ( $CH_2$ ), 25.9 ( $CH_2$ ,  $C(12''')$ ), 25.9 ( $CH_2$ ), 26.1 ( $CH_2$ ), 26.3 ( $CH_2$ ), 28.6 ( $CH_2$ ,  $C(14''')$ ), [28.9, 29.4, 29.73, 29.75, 30.05, 30.09, 30.18, 30.24, 32.3, 32.7, 33.4 ( $CH_2$ , alkyl chain, some resonance overlap)], 36.1 ( $CH_2$ ,  $C(11''')$ ), 39.7 ( $CH_2$ ,  $C(9''')$ ), 40.6 ( $CH_2$ ,  $C(18''')$ ), 51.1 (CH,  $C(2)$ ), 56.1 (CH,  $C(15''')$ ), 60.8 (CH,  $C(17''')$ ), 62.5 (CH,  $C(16''')$ ), 63.8 ( $CH_2$ ,  $C(4')$ ), 64.5 (CH,  $C(2'')$ ), 64.6 ( $CH_2$ ,  $C(3''')$ ), 70.0 ( $CH_2$ ,  $C(4''')$ ), 70.1 ( $CH_2$ ), 70.5 ( $2 \times CH_2$ , resonance overlap), 70.7 (CH), 70.8 ( $CH_2$ ), 70.9 ( $CH_2$ ), 72.2 (CH), 72.7 (CH), 73.2 ( $CH_2$ ,  $C(1')$ ), 74.8 (CH,  $C(3)$ ), 123.2 (CH,  $C(1'')$ ), 145.2 (C,  $C(2'')$ ), 164.8 (C, NHC=ONH), 168.7 (C,  $C(1'')$ ), 175.2 (C,  $C(10''')$ ) MS (TOF ES+)  $m/z$  1277.1 ( $[M + Na]^+$ , 100%), 650.0 (8); HRMS (TOF ES+) calcd for  $C_{67}H_{127}N_7O_{12}SNa$   $[M + Na]^+$  1276.9161, found 1276.9182; and then **(2''S)-10** as a white paste:  $R_f = 0.20$  (10%  $CH_3OH$  in  $CHCl_3$ ). The physical data obtained for **(2''S)-10** isolated from this epimeric mixture were identical to those obtained for the **(2''S)-10** obtained from the reaction of epimerically pure **(S)-17** with alkyne **18**.

## Synthesis of labeled glycolipid 11:

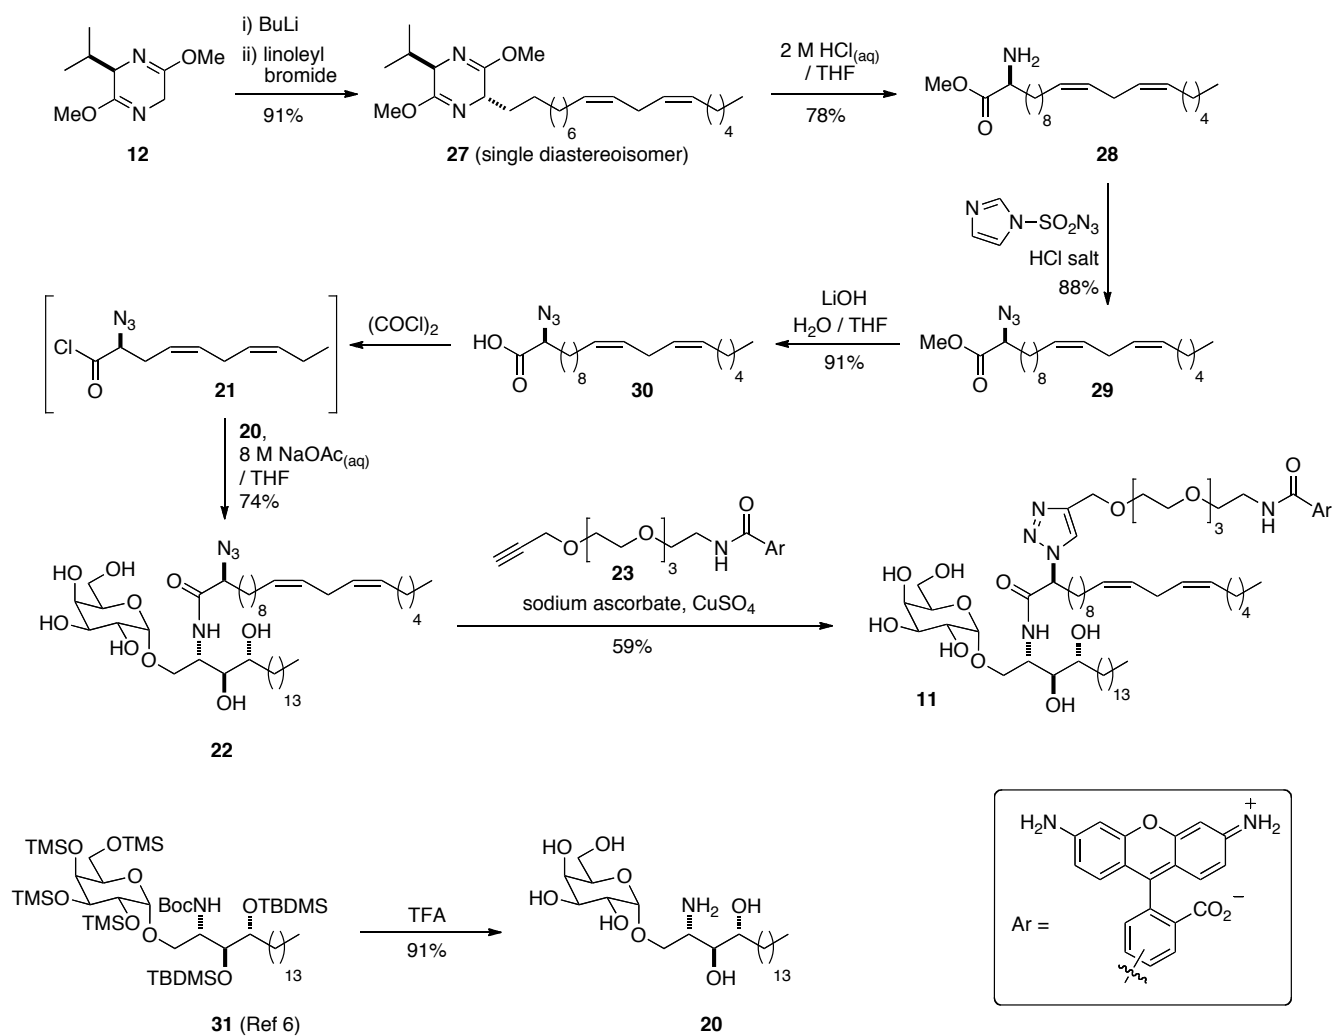

**(2*R*, 5*S*, 9'*Z*, 12'*Z*)-Isopropyl-3, 6-dimethoxy-5-(octadeca-9', 12'-dienyl)-2, 5-dihydropyrazine (27)**

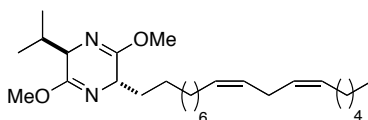

A solution of BuLi (2.5 M in hexane, 52  $\mu$ L, 0.13 mmol) was added dropwise over 1 min to a stirred solution of commercially available (2*R*)-2-isopropyl-3,6-dimethoxy-2,5-dihydropyrazine **12** (23  $\mu$ L, 0.13 mmol) in THF (1 mL) at  $-78$   $^{\circ}$ C. Stirring was continued at this temperature for 45 min before a solution of linoleyl bromide<sup>[51]</sup> (42 mg, 0.13 mmol) in THF (1 mL) was added over 5 min. The reaction mixture was then stirred for 24 h, slowly warming to r.t. The reaction mixture was quenched by the addition of  $\text{NH}_4\text{Cl}$  solution (5 mL) and EtOAc (5 mL) and the phases were separated. The aqueous phase was extracted with EtOAc (3  $\times$  5 mL) and then the combined organic extracts were washed with brine (20 mL), dried ( $\text{MgSO}_4$ ), filtered and concentrated under reduced pressure. The residue was purified by flash column chromatography to afford dihydropyrazine **27** as a colorless oil (51 mg, 91%);  $R_f = 0.27$  (3% EtOAc in hexane);  $[\alpha]_D^{20} -15.3$  ( $c = 1$  in  $\text{CHCl}_3$ );  $\nu_{\text{max}}$ (film) /  $\text{cm}^{-1}$  1693s (C=N), 1634m (C=C);  $\delta_{\text{H}}$ (300 MHz,  $\text{CDCl}_3$ ) 0.68 (d,  $J$  6.8, 3H), 0.88 (t,  $J$  6.8, 3H), 1.04 (d,  $J$  6.8, 3H), 1.14–1.43 (stack, 18H), 1.60–1.90 (stack, 2H), 1.98–2.11 (stack, 4H), 2.26 (septet of doublets,  $J$  6.9, 3.3, 1H), 2.76 (app t,  $J$  6.0, 2H), 3.67 (s, 3H), 3.68 (s, 3H), 3.92 (dd,  $J$  6.9, 3.3, 1H), 4.01 (dt,  $J$  5.7, 4.2, 1H), 5.26–5.44 (stack, 4H);  $\delta_{\text{C}}$ (100 MHz,  $\text{CDCl}_3$ ) 14.0 ( $\text{CH}_3$ ), 16.5 ( $\text{CH}_3$ ), 19.0 ( $\text{CH}_3$ ), 22.5 ( $\text{CH}_2$ ), 24.4 ( $\text{CH}_2$ ), 25.6 ( $\text{CH}_2$ ), 27.2 ( $\text{CH}_2$ ), [29.27, 29.32, 29.7, 31.5, 34.1 ( $\text{CH}_2$ , some resonance overlap)], 31.6 ( $\text{CH}$ ), 52.2 ( $\text{CH}_3$ , resonance overlap), 55.5 ( $\text{CH}$ ), 60.6 ( $\text{CH}$ ), 127.9 ( $\text{CH}$ ), 128.0 ( $\text{CH}$ ), 129.99 ( $\text{CH}$ ), 130.11 ( $\text{CH}$ ), 163.3 (C), 164.0 (C); MS (TOF ES+)  $m/z$  433.4 ( $[\text{M} + \text{H}]^+$ , 100%); HRMS (TOF ES+) calcd for  $\text{C}_{27}\text{H}_{49}\text{N}_2\text{O}_2$   $[\text{M} + \text{H}]^+$  433.3794, found 433.3791.

**(2S, 11Z, 14Z)-Methyl 2-aminoeicosa-(11, 14)-dienoate (28)**

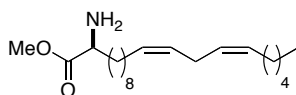

Hydrochloric acid (0.71 mL, 1.0 M solution, 0.71 mmol) was added to a vigorously stirred solution of dihydropyrazine **27** (50 mg, 0.116 mmol) in THF (2 mL) at r.t. After 4 h, the mixture was cooled to 0 °C and quenched with NaOH solution (0.36 mL, 2.0 M solution, 0.72 mmol). EtOAc (5 mL) and H<sub>2</sub>O (5 mL) were added and the phases were separated. The aqueous phase was extracted with EtOAc (3 × 5 mL). The combined organic extracts were washed with brine (20 mL), dried (MgSO<sub>4</sub>), filtered and concentrated under reduced pressure. Purification of the residue by flash column chromatography afforded amine **28** as a colorless oil (31 mg, 78%); *R<sub>f</sub>* = 0.23 (5% CHCl<sub>3</sub> in MeOH); [α]<sub>D</sub><sup>20</sup> +18.4 (*c* = 1 in CHCl<sub>3</sub>); ν<sub>max</sub>(film) / cm<sup>-1</sup> 3372s br (NH<sub>2</sub>), 1747s (C=O), 1635m (C=C); δ<sub>H</sub>(300 MHz, CDCl<sub>3</sub>) 0.87 (t, *J* 6.6, 3H), 1.19–1.40 (stack, 16H), 1.41–1.60 (stack, 3H), 1.60–1.75 (m, 1H), 2.01 (app. q, *J* 6.6, 4H), 2.73 (app. t, *J* 6.0, 2H), 3.40 (app. t, *J* 6.6, 1H), 3.68 (s, 3H), 5.21–5.42 (stack, 4H), exchangeable hydrogens not observed; δ<sub>C</sub>(100 MHz, CDCl<sub>3</sub>) 13.9 (CH<sub>3</sub>), 22.5 (CH<sub>2</sub>), 25.5 (CH<sub>2</sub>), 27.1 (CH<sub>2</sub>), [29.2, 29.28, 29.33, 29.5, 31.4, 34.9 (CH<sub>2</sub>, some resonance overlap)], 51.7 (CH<sub>3</sub>), 54.4 (CH), 127.8 (CH), 127.9 (CH), 130.0 (CH), 130.1 (CH), 176.6 (C); MS (TOF ES+) *m/z* 338.3 ([M + Na]<sup>+</sup>, 100%); HRMS (TOF ES+) calcd for C<sub>21</sub>H<sub>40</sub>NaNO<sub>2</sub> [M + Na]<sup>+</sup> 338.3059, found 338.3063.

**(2S, 11Z, 14Z)-Methyl 2-azidoeicosa-(11, 14)-dienoate (29)**

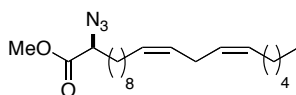

Amine **28** (28 mg, 0.083 mmol) was dissolved in MeOH:CH<sub>2</sub>Cl<sub>2</sub>:H<sub>2</sub>O (2:1:1, 4 mL). K<sub>2</sub>CO<sub>3</sub> (62 mg, 0.58 mmol), CuSO<sub>4</sub> (133 μg, 0.87 μmol) and imidazole-1-sulfonyl azide hydrochloride<sup>[3]</sup> (70 mg, 0.33 mmol) were added sequentially. The reaction mixture was stirred overnight and then diluted with EtOAc (15 mL) and H<sub>2</sub>O (15 mL). The phases were separated and the aqueous phase was extracted with EtOAc (3 × 15 mL). The combined organic extracts were washed with brine (60 mmol), dried (MgSO<sub>4</sub>), filtered and concentrated under reduced pressure. Purification of the residue by flash column chromatography (3% EtOAc in hexane) provided azide **29** as a colorless oil (27 mg, 88%); *R<sub>f</sub>* = 0.24 (3% EtOAc in hexane); [α]<sub>D</sub><sup>20</sup> -3.6 (*c* = 1 in CHCl<sub>3</sub>); ν<sub>max</sub>(film) / cm<sup>-1</sup> 2108s (N<sub>3</sub>), 1746s (C=O), 1632m (C=C); δ<sub>H</sub>(300 MHz, CDCl<sub>3</sub>) 0.88 (app. t, *J* 6.8, 3H), 1.21–1.49 (stack, 18H), 1.68–1.90 (stack, 2H), 2.00–2.10 (stack, 4H), 2.77 (app. t, *J* 6.0, 2H), 3.79 (s, 3H), 3.81 (dd, *J* 8.4, 5.4, 1H), 5.27–5.44 (stack, 4H); δ<sub>C</sub>(100 MHz, CDCl<sub>3</sub>) 14.0 (CH<sub>3</sub>), 22.5 (CH<sub>2</sub>), 25.6 (CH<sub>2</sub>), 25.7 (CH<sub>2</sub>), 27.2 (CH<sub>2</sub>), [29.0, 29.2, 29.27, 29.33, 29.6, 31.3, 31.5 (CH<sub>2</sub>, some overlapping resonances)], 52.5 (CH<sub>3</sub>), 62.0 (CH), 127.9 (CH), 128.0 (CH), 130.0 (CH), 130.2 (CH), 171.2 (C); MS (TOF ES+) *m/z* 386.3 ([M + Na]<sup>+</sup>, 100%); HRMS (TOF ES+) calcd for C<sub>21</sub>H<sub>37</sub>N<sub>3</sub>NaO<sub>2</sub> [M + Na]<sup>+</sup> 386.2783, found 386.2778.

**(2S, 11Z, 14Z)-2-Azidoeicosa-(11, 14)-dienoic acid (30)**

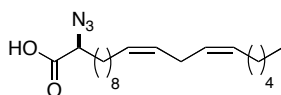

LiOH·H<sub>2</sub>O (11.5 mg, 0.28 mmol) was added to a vigorously stirred solution of azide **29** (25 mg, 0.069 mmol) in THF/H<sub>2</sub>O (1:1, 2 mL) at r.t. After stirring for 1 h, the mixture was cooled to 0 °C and quenched by the addition of hydrochloric acid (10 mL, 0.5 M solution). EtOAc (10 mL) was added and the phases were separated. The aqueous phase was extracted with EtOAc (3 × 10 mL) and the combined organic extracts were washed with brine (40 mL), dried (MgSO<sub>4</sub>), filtered and concentrated under reduced pressure. Purification of the residue by flash column chromatography (60% EtOAc in hexane) afforded carboxylic acid **30** as a colorless oil (22 mg, 91%); *R<sub>f</sub>* = 0.31 (5% CHCl<sub>3</sub> in MeOH); [α]<sub>D</sub><sup>20</sup> -17.6 (*c* = 1 in CHCl<sub>3</sub>); ν<sub>max</sub>(film) / cm<sup>-1</sup> 3300–2600 w v br (O–H), 2126 m (N<sub>3</sub>), 1716 m (C=O), 1635 m (C=C); δ<sub>H</sub>(300 MHz, CDCl<sub>3</sub>) 0.89 (t, *J* 6.9, 3H), 1.23–1.57 (stack, 18H), 1.71–1.98 (stack, 2H), 2.05 (app. q, *J* 6.6, 4H), 2.78 (app. t, *J* 6.0, 2H), 3.89 (dd, *J* 8.4, 5.4, 1H), 5.27–5.45 (stack, 4H); δ<sub>C</sub>(100 MHz, CDCl<sub>3</sub>) 14.0 (CH<sub>3</sub>), 22.5 (CH<sub>2</sub>), 25.6 (CH<sub>2</sub>), 25.7 (CH<sub>2</sub>), 27.2 (CH<sub>2</sub>), [29.0, 29.2, 29.3, 29.4, 29.6, 31.3, 31.5 (CH<sub>2</sub>, some overlapping resonances)], 61.8 (CH), 127.9 (CH), 128.0 (CH), 130.0 (CH), 130.2 (CH), 176.7 (C); MS (TOF ES+) *m/z* 372.3 ([M + Na]<sup>+</sup>, 100%); HRMS (TOF ES+) calcd for C<sub>20</sub>H<sub>35</sub>N<sub>3</sub>NaO<sub>2</sub> [M + Na]<sup>+</sup> 372.2627, found 372.2630.

### $\alpha$ -D-Galactopyranosyl-1-O-phytosphingosine (**20**)

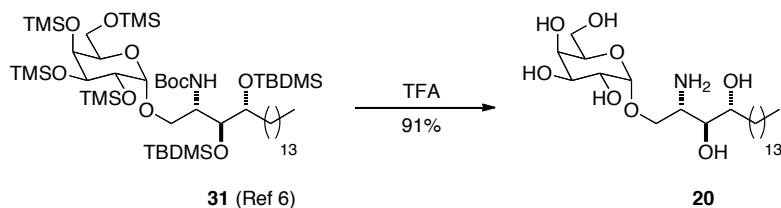

TFA (1.0 mL, 13.2 mmol) was added dropwise over 5 min to glycoside **31**<sup>[6]</sup> (80 mg, 0.072 mmol) at r.t. After 30 min, the reaction mixture was concentrated under reduced pressure to afford amine **20** as a colorless oil (32 mg, 91%). This material was used in the next step without further purification.

### (2*S*, 3*S*, 4*R*, 2'*S*, 11'*Z*, 14'*Z*)-2-[2'-Azidoeicosa-(11', 14')-dienoylamino]-1-*O*-[ $\alpha$ -D-galactopyranose]octadecane-1, 3, 4-triol (**22**)

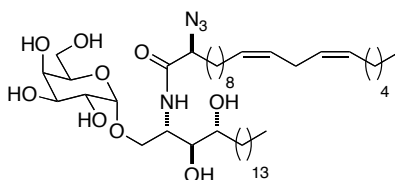

A solution of carboxylic acid **30** (10 mg, 0.029 mmol) and (COCl)<sub>2</sub> (7.4  $\mu$ L, 0.087 mmol) in CH<sub>2</sub>Cl<sub>2</sub> (1.0 mL) was stirred at 70 °C for 3 h, after which time, the solution was cooled to r.t. and the CH<sub>2</sub>Cl<sub>2</sub> and unreacted (COCl)<sub>2</sub> were removed under a stream of argon. The residual volatiles were removed under reduced pressure. The resulting crude acyl chloride **21** was dissolved in THF (1 mL) and added, with vigorous stirring, to a solution of amine **20** (13.7 mg, 0.029 mmol) in THF / NaOAc<sub>(aq)</sub> (8 M) (2 mL, 1:1). Vigorous stirring was maintained for 2 h, after which time, the mixture was left to stand and



the phases were separated. The aqueous phase was extracted with THF (2 × 1 mL), and the combined organic phases were concentrated under reduced pressure. Purification of the residue by flash column chromatography (10% MeOH in CHCl<sub>3</sub>) afforded amide **22** as a colorless paste (17.4 mg, 74%);  $R_f = 0.23$  (5% CHCl<sub>3</sub> in MeOH); the poor solubility of this amphiphilic compound at r.t. prevented us from obtaining reliable optical rotation data;  $\nu_{\max}(\text{film}) / \text{cm}^{-1}$  3301br s (O–H), 2107 (N<sub>3</sub>), 1698m (C=O), 1634s (C=C);  $\delta_{\text{H}}$ (400 MHz, CDCl<sub>3</sub>/CD<sub>3</sub>OD, 2:1) 0.86 (app. t,  $J$  6.8, 6H, 2 × terminal CH<sub>3</sub>), 1.20–1.45 (stack, 42H, alkyl chain), 1.47–1.88 (stack, 4H, alkyl chain), 2.02 (app. q,  $J$  6.8, 4H), 2.74 (app. t,  $J$  6.4, 2H.), 3.48–3.57 (stack, 2H), 3.63–3.74 (stack, 4H), 3.75–3.80 (stack, 3H), 3.87 (dd,  $J$  10.8, 4.8, 1H), 3.89–3.92 (m, 1H), 4.20 (app. q,  $J$  4.8, 1H), 4.88 (d,  $J$  3.6, 1H, anomeric- $H$ ), 5.24–5.49 (stack, 4H, 2 × CH=CH), exchangeable protons not observed;  $\delta_{\text{C}}$ (100 MHz, CDCl<sub>3</sub>) 14.3 (CH<sub>3</sub>, 2 × terminal CH<sub>3</sub>), 23.0 (CH<sub>2</sub>), 23.1 (CH<sub>2</sub>), 26.0 (CH<sub>2</sub>), 26.2 (CH<sub>2</sub>), 26.3 (CH<sub>2</sub>), 27.6 (CH<sub>2</sub>), [29.6, 29.7, 29.8, 29.9, 30.2, 31.97, 32.04, 32.3, 32.4, 32.9 (CH<sub>2</sub>, alkyl chain, some overlapping resonances)], 51.0 (CH), 62.3 (CH<sub>2</sub>), 64.0 (CH), 67.6 (CH<sub>2</sub>), 69.4 (CH), 70.3 (CH), 70.8 (CH), 71.4 (CH), 72.3 (CH), 74.9 (CH), 100.3 (CH, C-anomeric), 128.4 (CH, CH=CH), 128.5 (CH, CH=CH), 130.4 (CH, CH=CH), 130.5 (CH, CH=CH), 171.0 (C, C=O); MS (TOF ES+)  $m/z$  833.6 ([M + Na]<sup>+</sup>, 100%); HRMS (TOF ES+) calcd for C<sub>44</sub>H<sub>82</sub>N<sub>4</sub>NaO<sub>9</sub> [M + Na]<sup>+</sup> 833.5979, found 833.5971.

**Fluor 488-labeled  $\alpha$ -GalCer (**11**)** [1:1, mixture of regioisomers in the label]

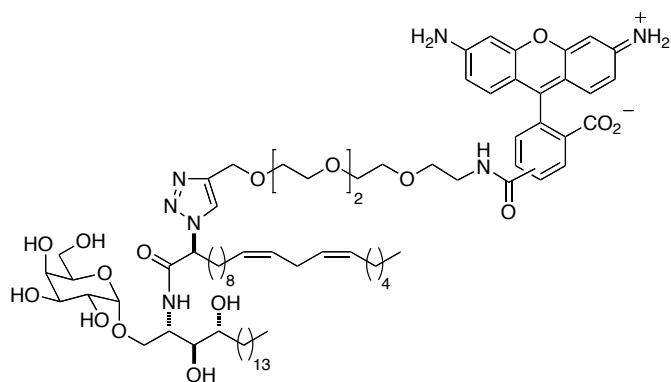

CuSO<sub>4</sub> solution (6  $\mu$ L of a 0.5 M solution, 3  $\mu$ mol) and sodium ascorbate solution (13  $\mu$ L of a 1.0 M solution, 13  $\mu$ mol) were added to a solution of azide **22** (1.4 mg, 1.7  $\mu$ mol) and alkyne **23** (1.0 mg, 1.7  $\mu$ mol) in *t*-BuOH / H<sub>2</sub>O (0.5 mL, 1:1) at r.t. The reaction mixture was heated for 10 h at 50 °C and then diluted with CHCl<sub>3</sub> (5 mL), and washed with brine (1.5 mL). The phases were separated and the aqueous layer was extracted with CHCl<sub>3</sub> (2  $\times$  2.5 mL). The combined organic layers were dried over Na<sub>2</sub>SO<sub>4</sub> and the volatiles were removed under reduced pressure. Purification of the residue by flash column chromatography (CHCl<sub>3</sub>/MeOH/H<sub>2</sub>O 65:25:4) afforded triazole **11** as a red solid (1.4 mg, 59%, 1:1, mixture of regioisomers in the label);  $R_f$  = 0.32 (CHCl<sub>3</sub>/MeOH/H<sub>2</sub>O, 65:25:4);  $\delta_H$ (400 MHz, CDCl<sub>3</sub>/CD<sub>3</sub>OD, 2:1) 0.83 (t, *J* 6.7, 3H), 0.84 (t, *J* 6.7, 3H), 1.10–1.39 (stack, 44H), 1.40–1.65 (m, 1H), 1.65–1.89 (m, 1H), 1.92–2.03 (stack, 5H), 2.12–2.30 (1H, m), 2.66–2.79 (stack, 2H), 3.46–3.79 (stack, 22H), 3.86 (dd, *J* 10.8, 4.8, 1H), 3.90 (br s, 1H), 4.12–4.22 (m, 1H), 4.55–4.67 (m, 2H), 4.88 (d, *J* 3.6, 1H), 5.21–5.41 (stack, 5H), 6.63–6.77 (stack, 4H), 6.96–7.09 (stack, 2H), 7.31 (d, *J* 9.0, 0.5H), 7.76 (br s, 0.5H), 7.92 (s, 1H), 8.13–8.24 (m, 1H), 8.31 (d, *J* 9.0, 0.5H), 8.72 (br s, 0.5H); MS (TOF ES<sup>-</sup>) *m/z*

1396.8 ([M – H]<sup>-</sup>, 10%), 1218.8 (5, [M – galactose]<sup>-</sup>), 1004.6 (15), 915.6 (25), 850.7 (65), 815.7 (35), 451.5 (95), 423.5 (100), 179.1 (20, [galactose]<sup>-</sup>).

## References

1. Wojno, J., Jukes, J.-P., Ghadbane, H., Shepherd, D., Besra, G. S., Cerundolo, V., and Cox, L. R. (2012) Amide analogues of CD1d agonists modulate iNKT-cell-mediated cytokine production. *ACS Chem. Biol.* 7, 847–855.
2. Gensler, W. J., Alam, I., Prasad, R. S., Radhakrishna, A. I., and Chaudhuri, H. I. (1979) 3-Hydroxy-2-alkyl carboxylic acids related to mycolic acid. *Tetrahedron* 35, 2595–2680.
3. Goddard-Borger, E. D., and Stick, R. V. (2007) An efficient, inexpensive and shelf-stable diazotransfer reagent: Imidazole-1-sulfonyl azide hydrochloride. *Org. Lett.* 9, 3797–3800.
4. Natarajan, A., Du, W., Xiong, C.-Y., DeNardo, G. L., DeNardo, S. J., and Gervay-Hague, J. (2007) Construction of di-scFv through a trivalent alkyne-azide 1,3-dipolar cycloaddition. *Chem. Commun.* 695–697.
5. Kling, M. R., Easton, C. J., and Poulos, A. (1993) Synthesis of very long chain fatty acid methyl esters. *J. Chem. Soc., Perkin Trans. 1*, 1183–1189.
6. Jervis, P. J., Cox, L. R., and Besra, G. S. (2011) Synthesis of a versatile building block for the preparation of 6-*N*-derivatized  $\alpha$ -galactosyl ceramides: Rapid access to biologically active glycolipids. *J. Org. Chem.* 76, 320–323.

## Statistical Analysis of Data Summarized in Figure 3

t-test used to compare ThrCer **5** with either (*R*)-**10**, (*S*)-**10** or ThrCer **10** at each concentration of lipids.

### Figure 3a

| conc'n (ng mL <sup>-1</sup> ) | <b>5 vs (<i>R</i>)-10</b> | <b>5 vs (<i>S</i>)-10</b> | <b>5 vs 10 (epimeric mixture)</b> |
|-------------------------------|---------------------------|---------------------------|-----------------------------------|
| 1000                          | NS                        | 0.0494                    | NS                                |
| 500                           | 0.027                     | NS                        | NS                                |
| 250                           | 0.0058                    | < 0.0001                  | 0.0315                            |
| 125                           | 0.0159                    | NS                        | NS                                |
| 64                            | 0.0278                    | 0.0083                    | 0.0251                            |
| 32                            | 0.0046                    | 0.0018                    | NS                                |
| 16                            | 0.0009                    | NS                        | NS                                |

### Figure 3b

| conc'n (ng mL <sup>-1</sup> ) | <b>5 vs (<i>R</i>)-10</b> | <b>5 vs (<i>S</i>)-10</b> | <b>5 vs 10 (epimeric mixture)</b> |
|-------------------------------|---------------------------|---------------------------|-----------------------------------|
| 1000                          | 0.0037                    | 0.0485                    | 0.0246                            |
| 100                           | 0.0325                    | 0.0002                    | 0.0002                            |
| 10                            | NS                        | 0.0005                    | 0.0005                            |
| 1                             | NS                        | NS                        | NS                                |
| 0.1                           | NS                        | NS                        | NS                                |
| 0.001                         | NS                        | NS                        | NS                                |
