# Supplementary material
Source: PubMed Central journal article supplement (PMC3630740)
Supplement: bc300556e_si_004.pdf [file bc300556e_si_004.pdf]

# Design, Synthesis and Functional Activity of Labeled CD1d Glycolipid Agonists

*Peter J. Jervis,<sup>†‡#</sup> Paolo Polzella,<sup>§#</sup> Justyna Wojno,<sup>†‡§</sup> John-Paul Jukes,<sup>§</sup> Hemza  
Ghadbane,<sup>§</sup> Yoel R. Garcia Diaz,<sup>†‡f</sup> Gurdyal S. Besra,<sup>‡\*</sup> Vincenzo Cerundolo,<sup>§\*</sup> and  
Liam R. Cox<sup>†\*</sup>*

<sup>†</sup>School of Chemistry, University of Birmingham, Edgbaston, Birmingham, B15 2TT,  
U. K. <sup>‡</sup>School of Biosciences, University of Birmingham, Edgbaston, Birmingham,  
B15 2TT, U. K. <sup>§</sup>Medical Research Council Human Immunology Unit, Nuffield  
Department of Medicine, Weatherall Institute of Molecular Medicine, University of  
Oxford, Oxford, OX3 9DS, U. K.

<sup>#</sup>These authors contributed equally to this work

[vincenzo.cerundolo@imm.ox.ac.uk](mailto:vincenzo.cerundolo@imm.ox.ac.uk); [g.besra@bham.ac.uk](mailto:g.besra@bham.ac.uk); [l.r.cox@bham.ac.uk](mailto:l.r.cox@bham.ac.uk)

## Supporting Information IV

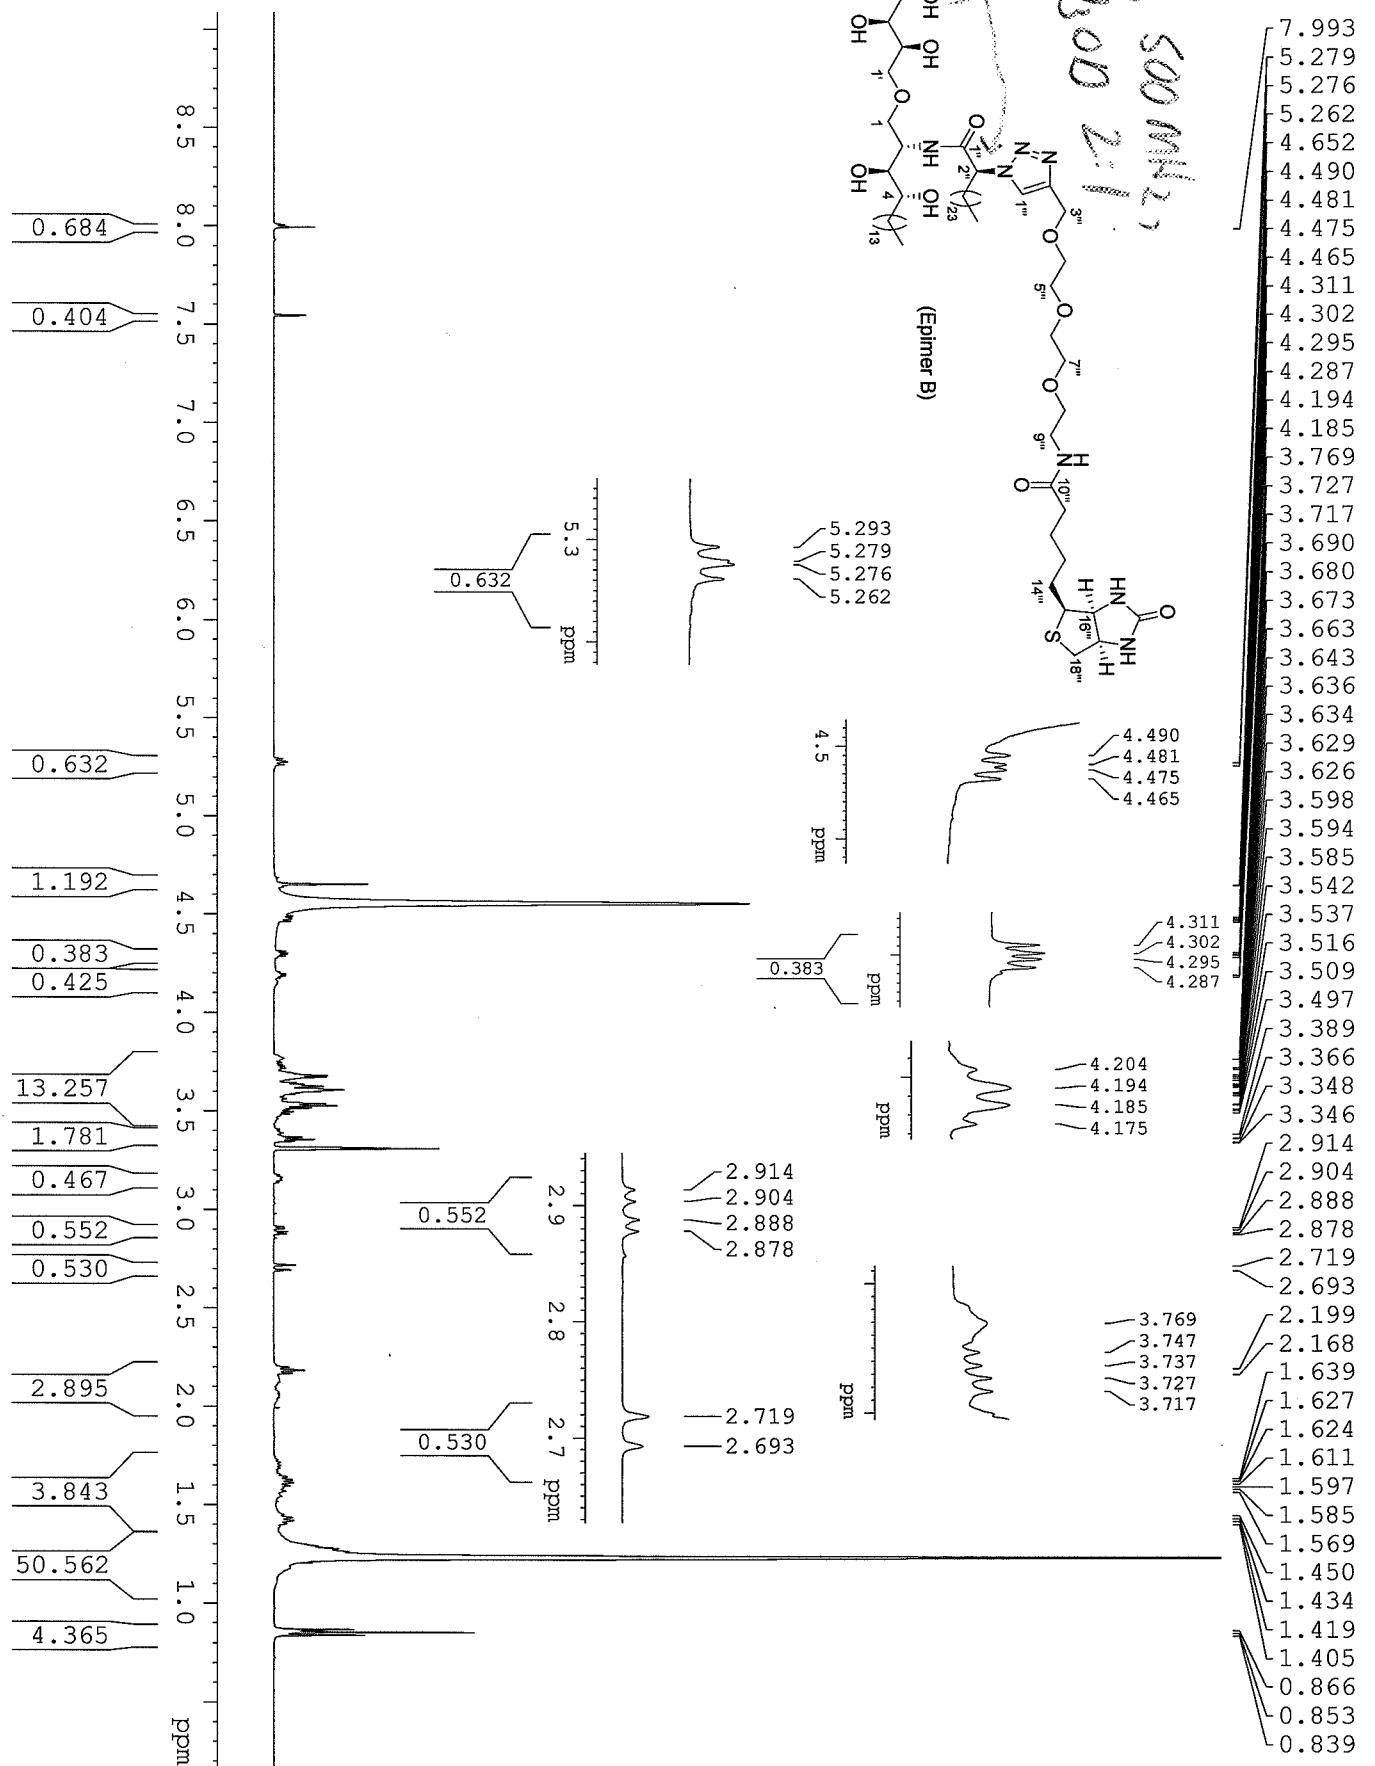

(S)-10, 125 MHz,

CDCl<sub>3</sub>/CD<sub>3</sub>OD 2:1

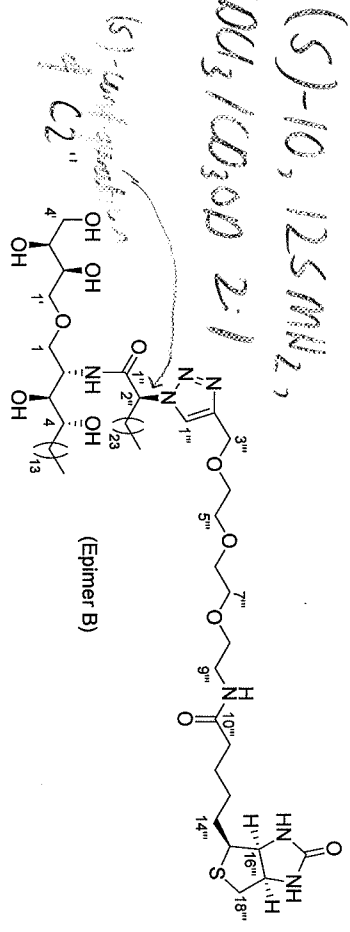

- 175.210
- 169.070
- 165.124
- 145.284
- 123.301

- 75.014
- 73.413
- 72.754
- 72.527
- 71.028
- 70.989
- 70.831
- 70.622
- 70.458
- 70.240
- 70.168
- 64.786
- 64.691
- 63.903
- 62.626
- 60.874
- 56.279
- 51.261
- 40.756
- 39.805
- 36.237
- 33.525
- 33.108
- 32.450
- 30.215
- 30.185
- 30.076
- 29.895
- 29.868
- 29.523
- 29.058
- 28.769
- 26.357
- 26.229
- 26.134
- 23.165
- 14.302

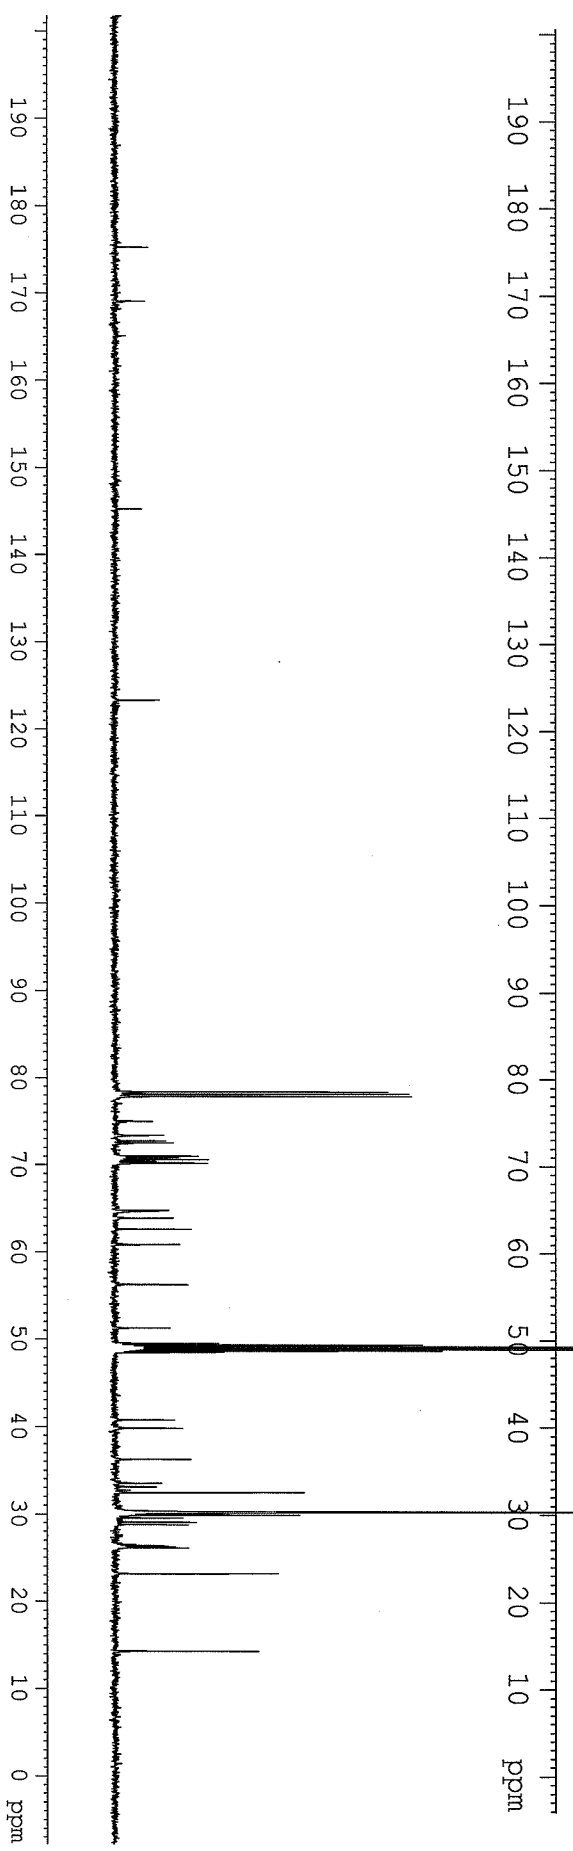

Pete Jarvis, d4-MeOH :CDCl3, 1:2, +27C, dtx500  
Epimer B, Gradient DQF-COSY90

(S)-10, 500 MHz,  
CDCl3/CD3OD 2:1

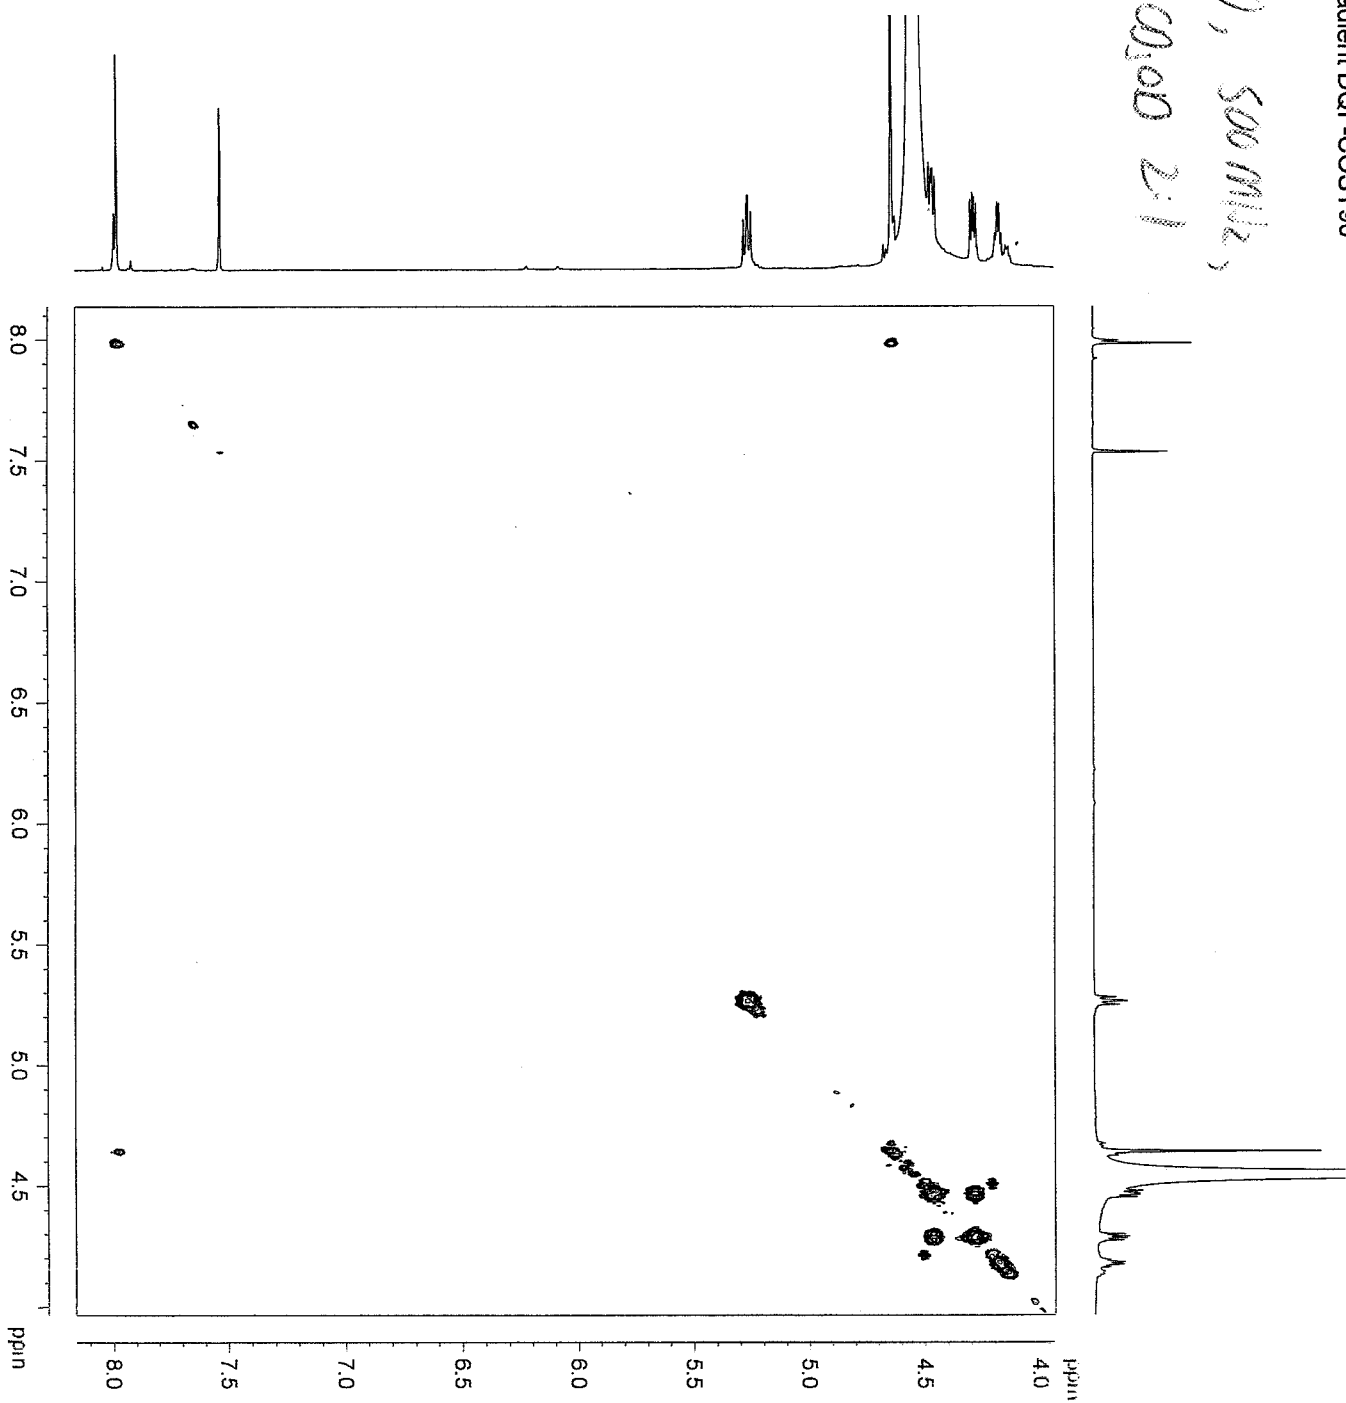

Pete Jarvis, d4-MeOH:CDCl3, 1:2, +27C, dtx500  
Epimer B, Gradient DQF-COSY90

(S)-10, 500 MHz,  
CDCl3/CD3OD 2:1

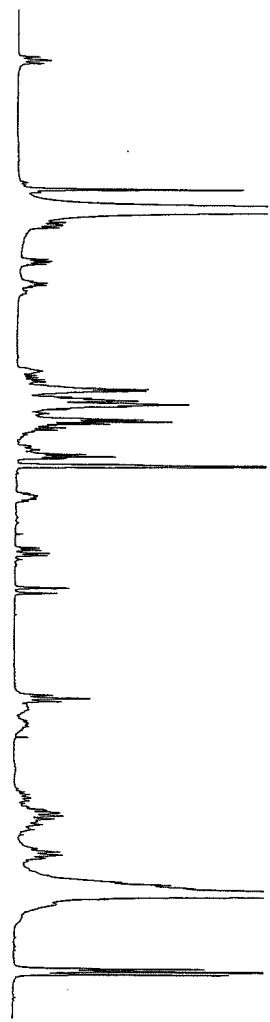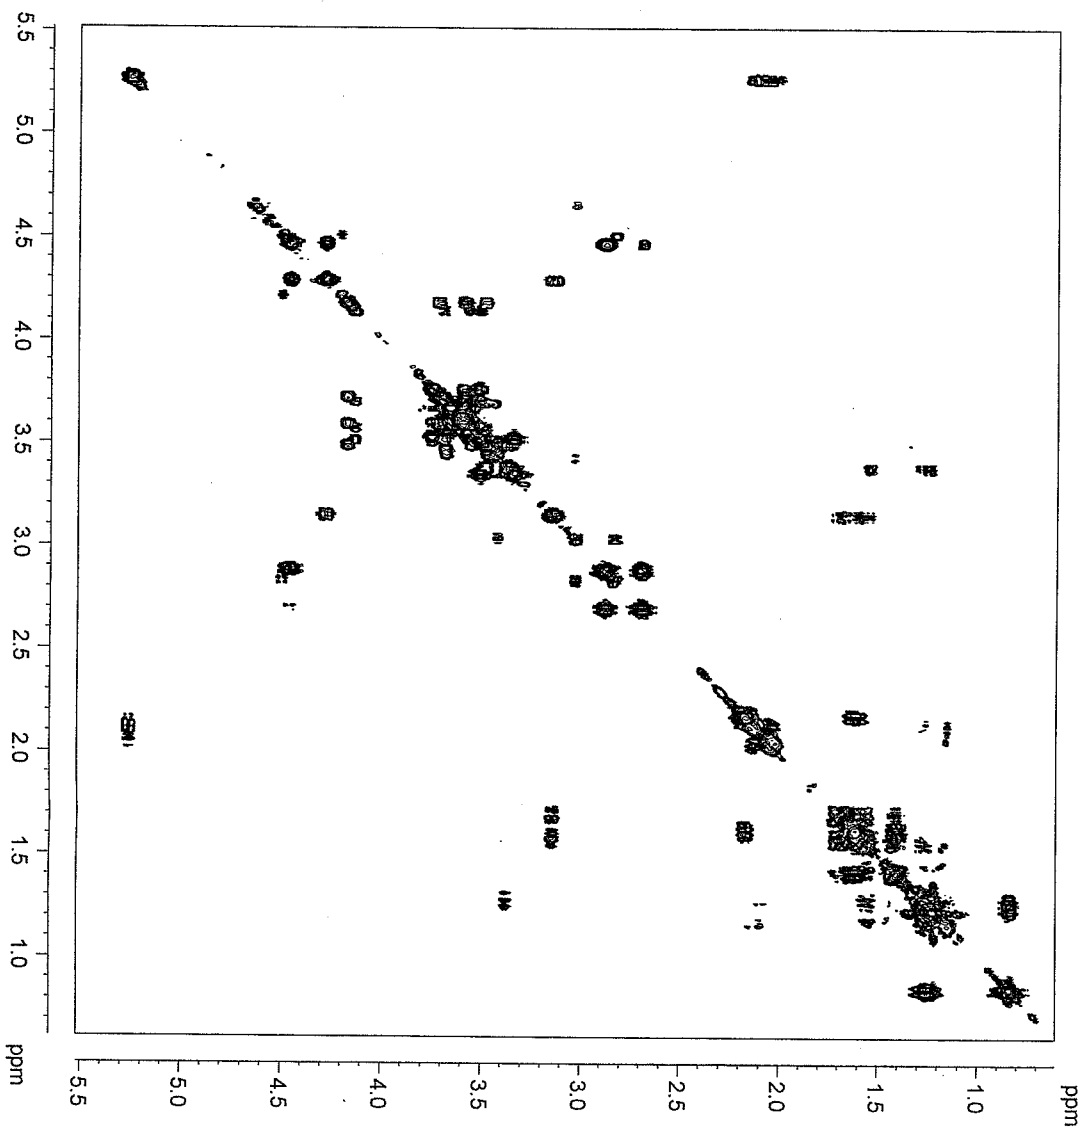

Pete Jarvis, d4-MeOH:CDCl3, 1:2, +27C, dtx500  
Epimer B, Gradient DQF-COSY90

(S)-10, 500 MHz,  
CDCl3/CD3OD 2:1

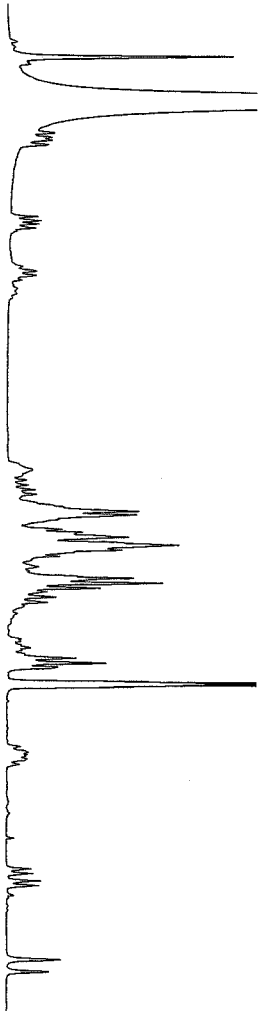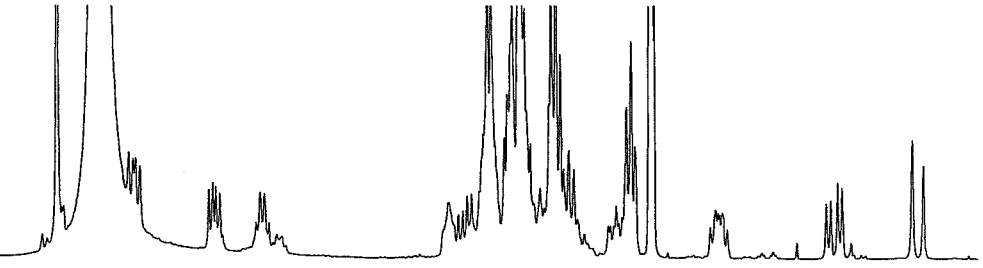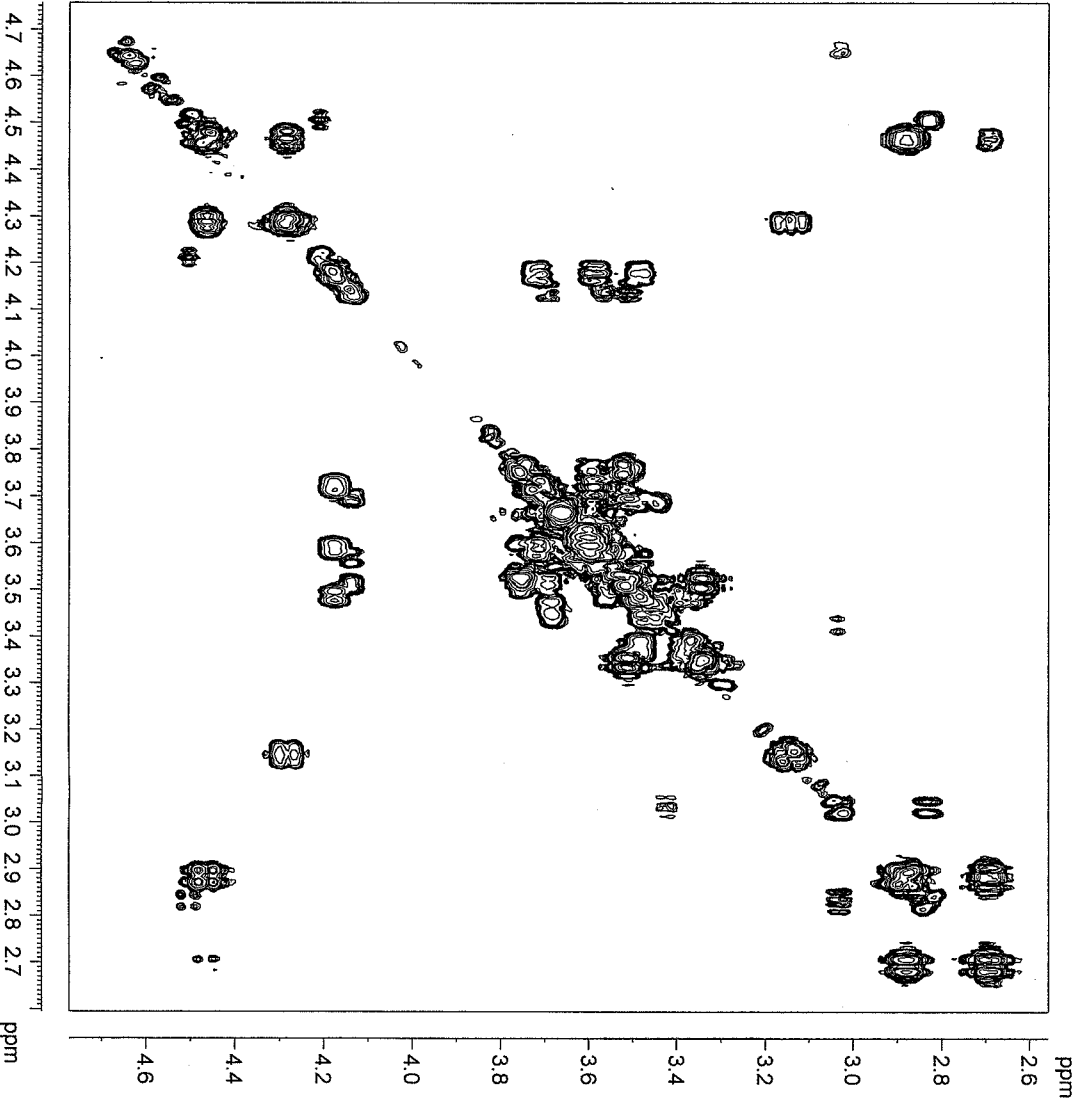

Pete Jarvis, d4-MeOH:CDCl3, 1:2, +27C, drx500  
Epimer B, Gradient DQF-COSY90

(S)-10, 500 MHz,  
CDCl3/CD3OD 2:1

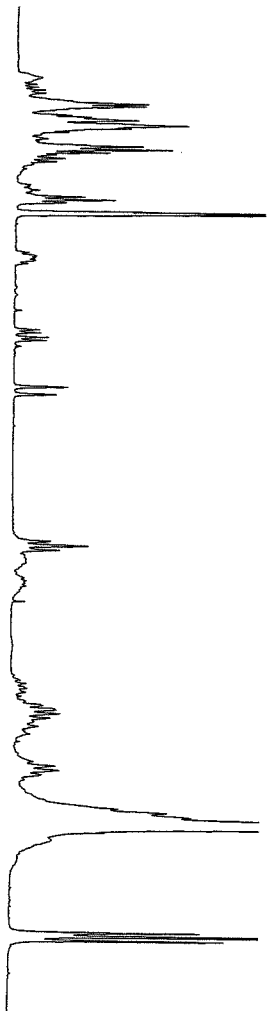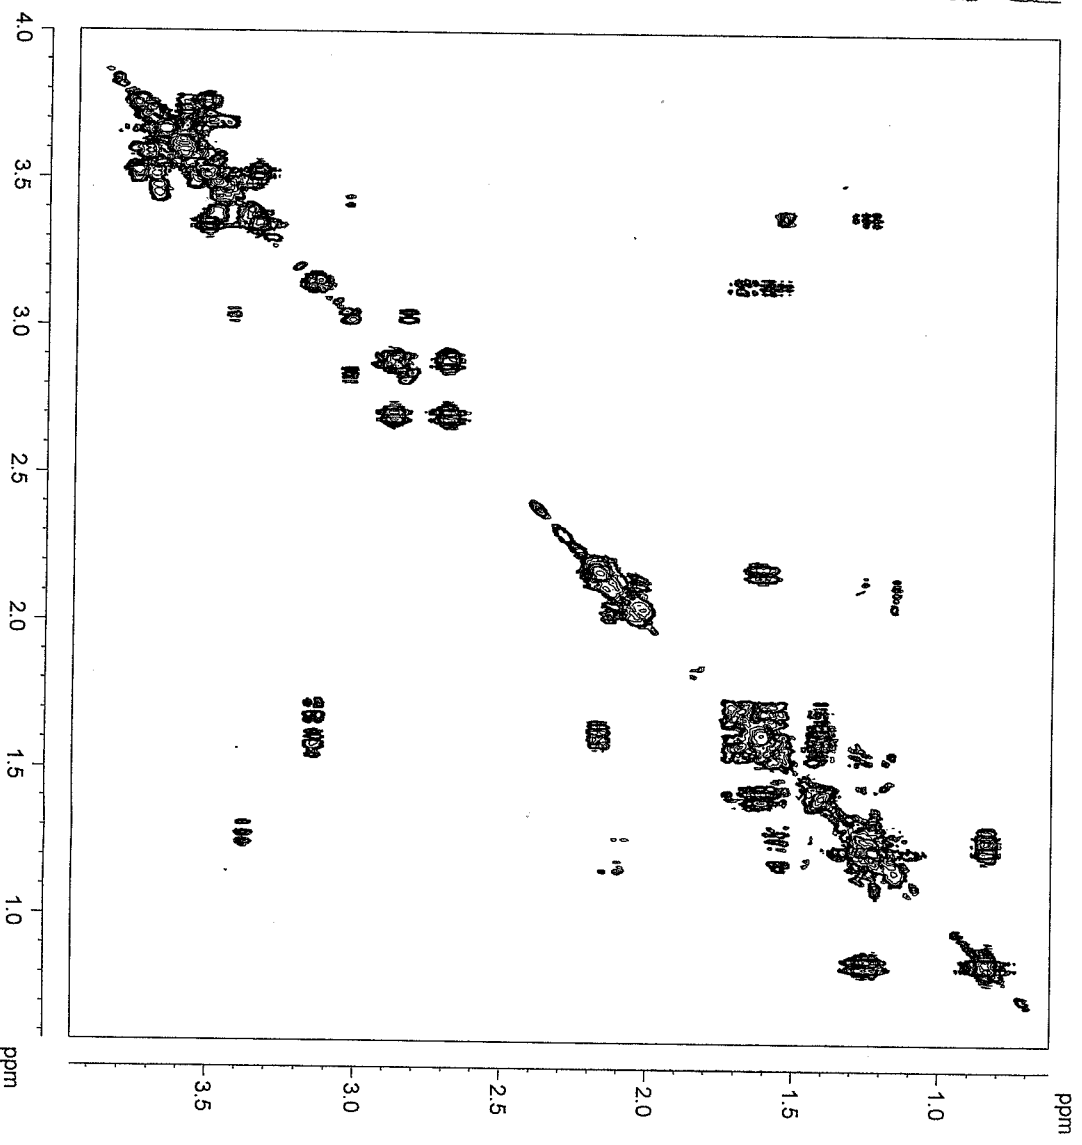

Pete Jarvis, d4-MeOH:CDCl3, 1:2, +27C, dirx500  
 Epimer B, Gradient HSQC,  
 with editing of CH, CH3 from CH2

(S)-10, 500 MHz  
 003/00300 2:1

f2 = CH  
 f1 = CH2

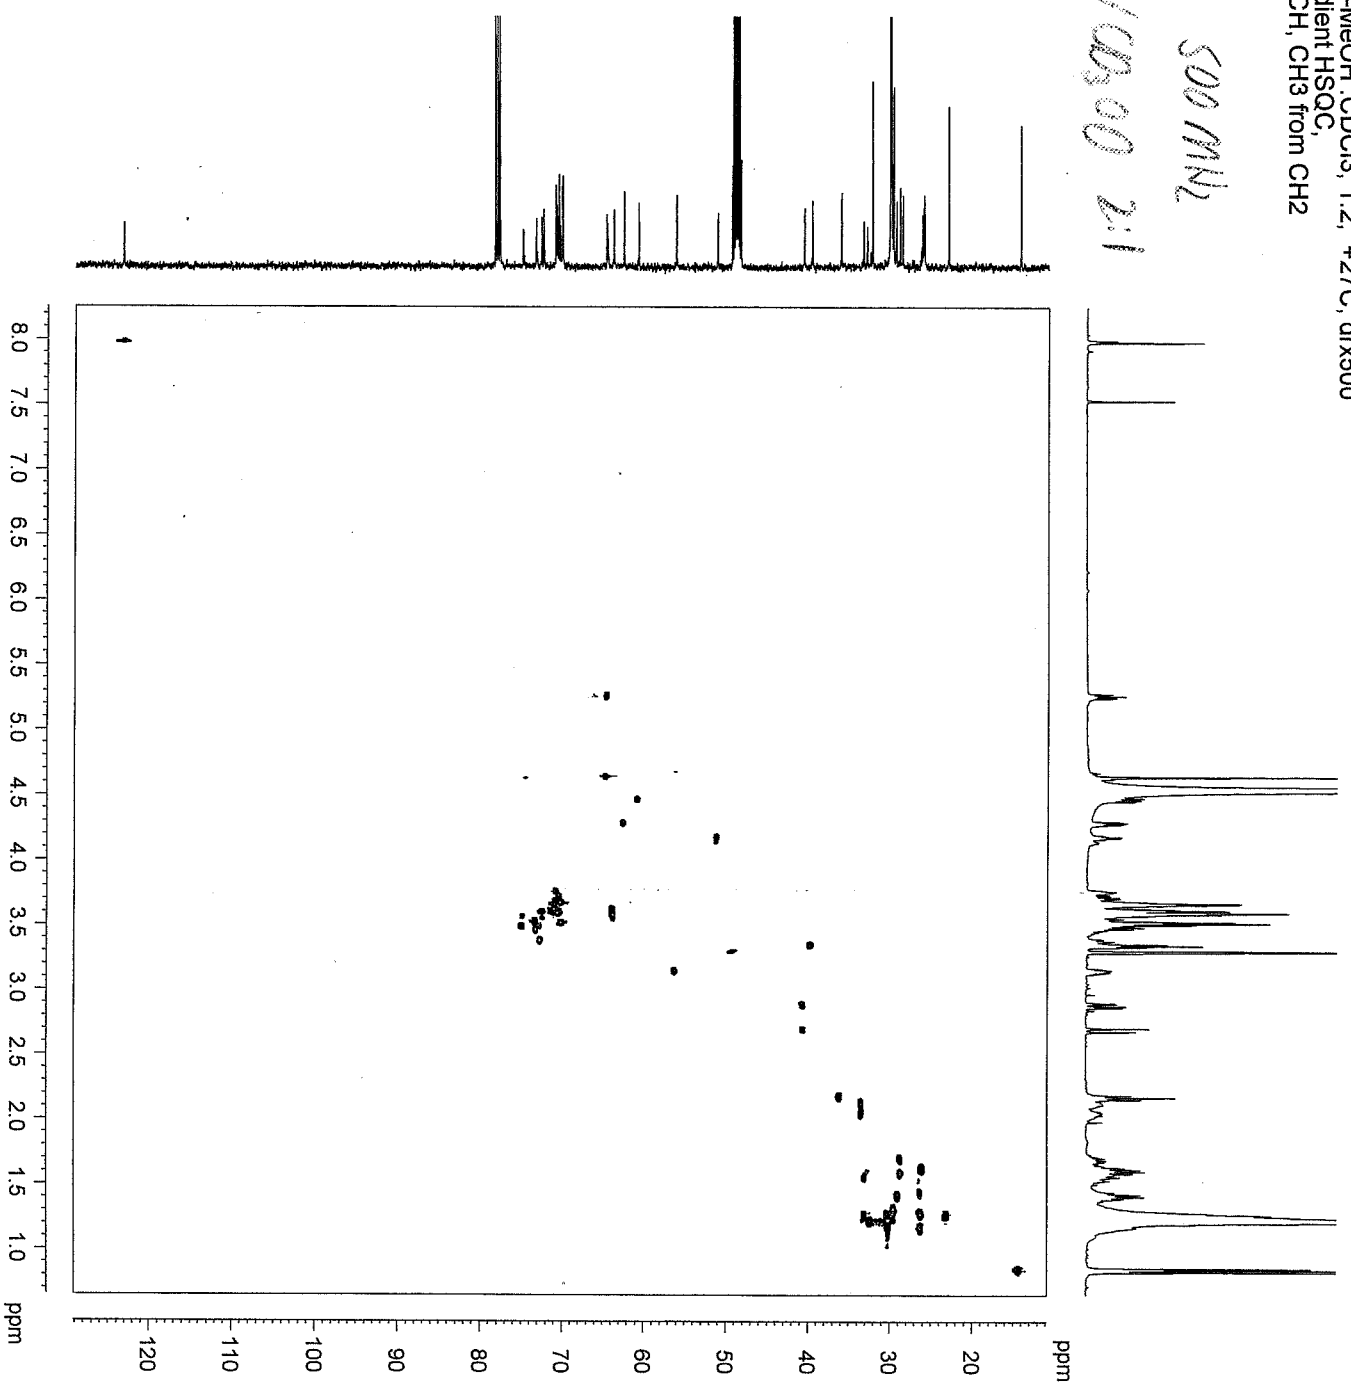

Current Data Parameters  
 NAME ap0491d  
 EXPNO 2  
 PROCNO 1

F2 - Acquisition Parameters  
 Date\_ 20110404  
 Time 12:17  
 INSTRUM dx500  
 PULPROG zgpg30  
 TD 2048  
 SOLVENT 8 MeOD  
 NS 8  
 DS 16  
 SWH 4464.286 Hz  
 FIDRES 2.179827 Hz  
 AQ 0.2294280 sec  
 RG 32768  
 DW 112.000 usec  
 DE 6.00 usec  
 TE 300.0 K  
 CNSTZ 148.0000000  
 D0 2.000000000 sec  
 d4 0.0017241 sec  
 d11 0.030000000 sec  
 d16 0.000100000 sec  
 d21 0.00344828 sec  
 DELTA1 0.00231087 sec  
 DELTA2 0.00338614 sec  
 DELTA3 0.00147414 sec  
 DELTA4 0.00343088 sec  
 INO 0.00002260 sec  
 ST1CNT 256

==== CHANNEL f1 =====  
 NUC1 1H  
 P1 12.20 usec  
 P2 24.40 usec  
 P3 1.00 usec  
 P4 1.00 usec  
 SFO1 500.1320450 MHz

==== CHANNEL f2 =====  
 CPDPRG2 gqfp  
 NUC2 13C  
 P3 11.00 usec  
 P4 500.00 usec  
 P31 1900.00 usec  
 POC PD2 76.00 usec  
 PL0 120.00 dB  
 PL2 -2.00 dB  
 PL12 1.40 dB  
 PFO2 125.7878780 MHz  
 SFO2 51.32 dB  
 SFO3 51.32 dB  
 SPNAM3 Cap105-520.1  
 SPNAM18 Cp60 vlr.2  
 SPOAL13 0.500  
 SPOAL18 0.500  
 SPOFFS3 0.00 Hz  
 SPOFFS18 0.00 Hz

==== GRADIENT CHANNEL =====  
 GPNAM1 SINE.100  
 GPNAM2 SINE.100  
 GPZ1 80.00 %  
 GPZ2 20.10 %  
 P16 1000.00 usec

F1 - Acquisition parameters  
 N10 54.2  
 N12 54.2  
 TD 2  
 SFO1 125.7679 MHz  
 FIDRES 43.210732 Hz  
 SW 175.911 ppm  
 FMODE Etho-Antlecho

F2 - Processing parameters  
 SI 2048  
 SF 500.1300164 MHz  
 WDWW QSINE  
 SSB 2  
 LB 0.00 Hz  
 GB 0  
 PC 1.40

F1 - Processing parameters  
 N10 0.24  
 N12 etho-Antlecho  
 SF 125.7679 MHz  
 WDWW QSINE  
 SSB 2  
 LB 0.00 Hz  
 GB 0



Pete Jarvis, d4-MeOH : CDCl3, 1:2, +27C, dx500  
Epimer B, Gradient HSQC,  
with editing of CH, CH3 from CH2

(S)-10, 500MHz,  
004310300 2.1

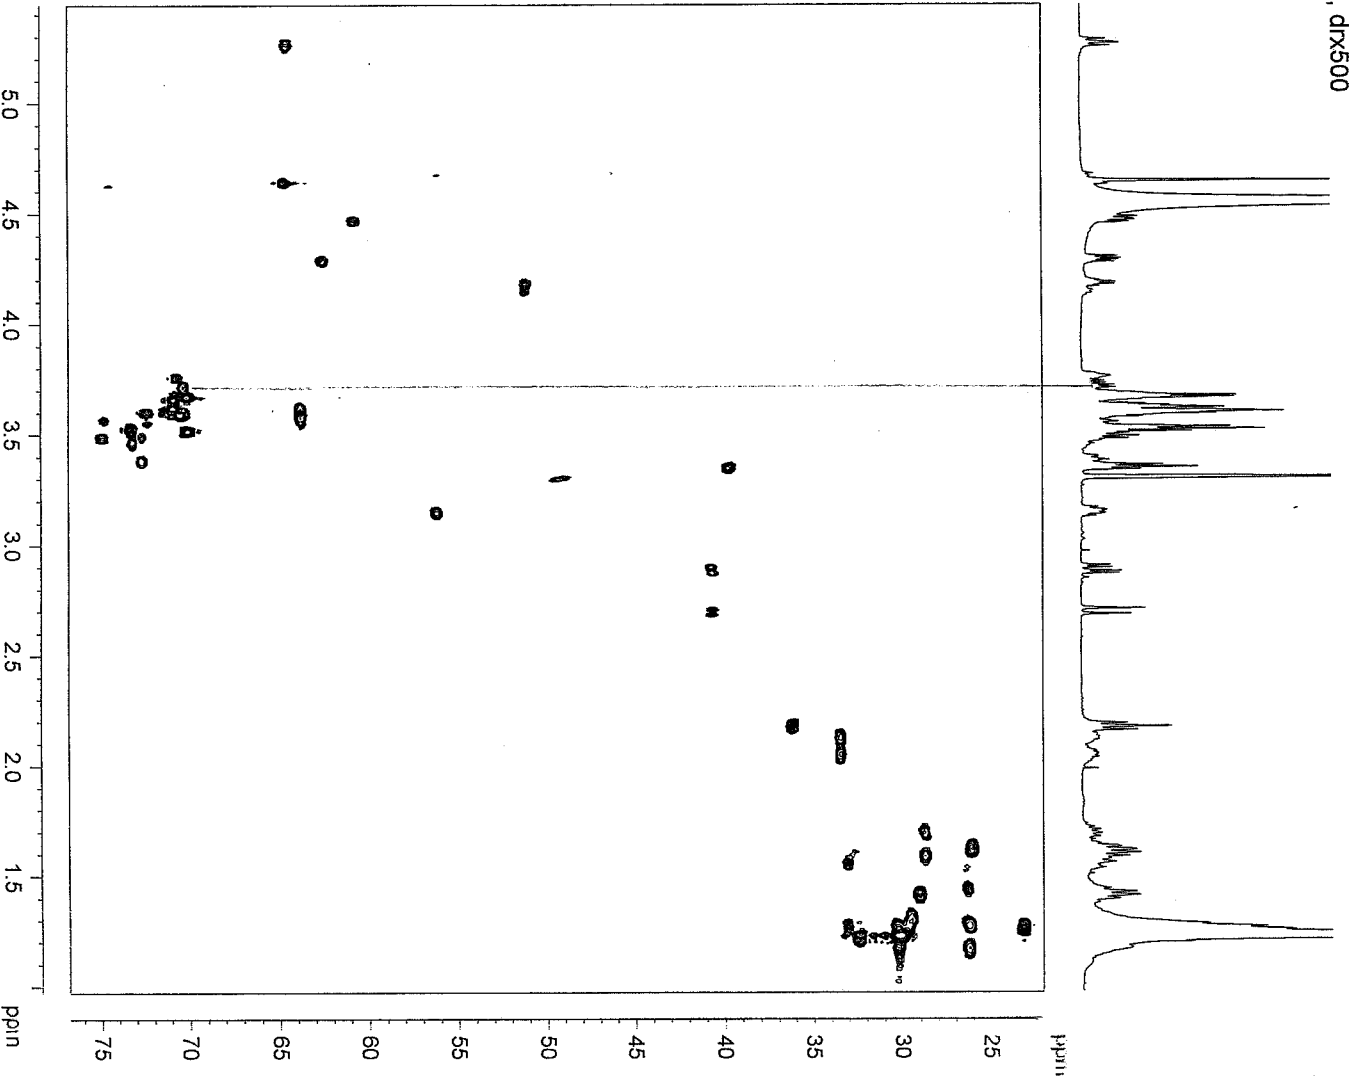

Pete Jarvis, d4-MeOH : CDCl<sub>3</sub>, 1:2, +27C, dx500  
Epimer B, Gradient HSQC,  
with editing of CH, CH<sub>3</sub> from CH<sub>2</sub>

(S)-10, SDOMNL,  
C<sub>12</sub>H<sub>13</sub> / C<sub>13</sub>H<sub>15</sub> 2:1

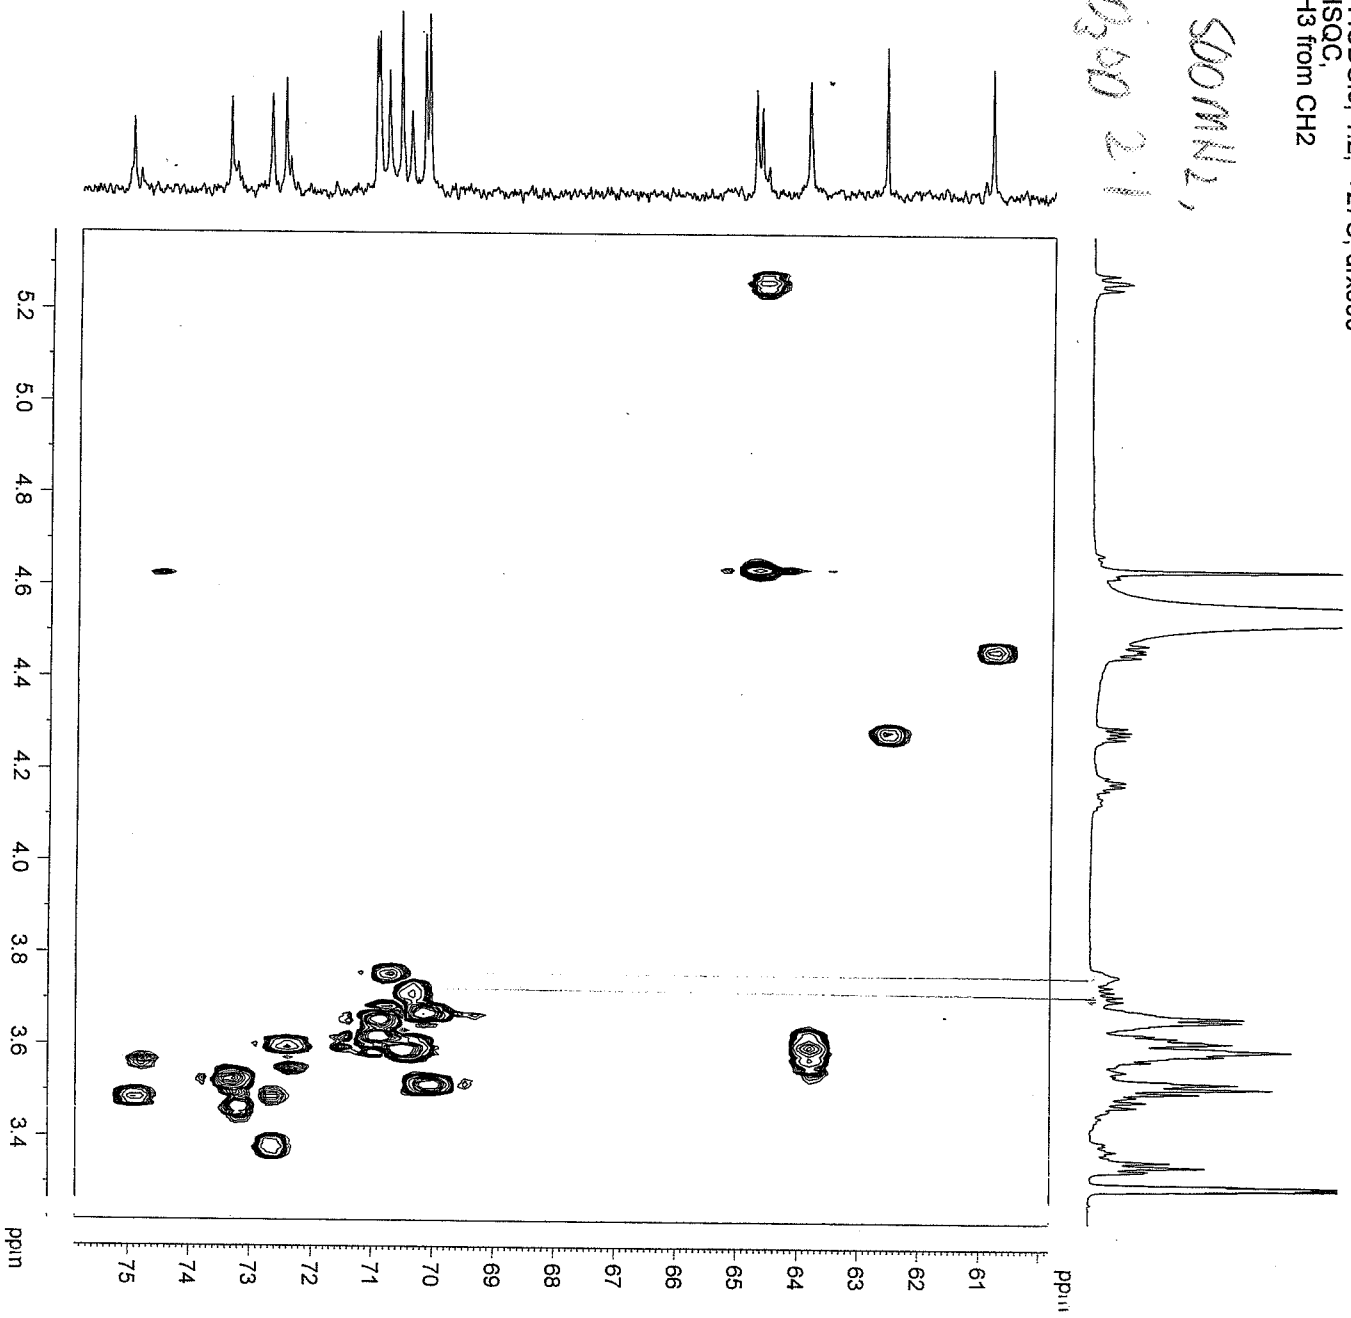

Pete Jarvis, d4-MeOH : CDCl<sub>3</sub>, 1:2, +27C, dirx500  
Epimer B, Gradient HSQC,  
with editing of CH, CH<sub>3</sub> from CH<sub>2</sub>

(S)-10, 500 MHz,  
COU<sub>3</sub>/CO<sub>3</sub> 2:1

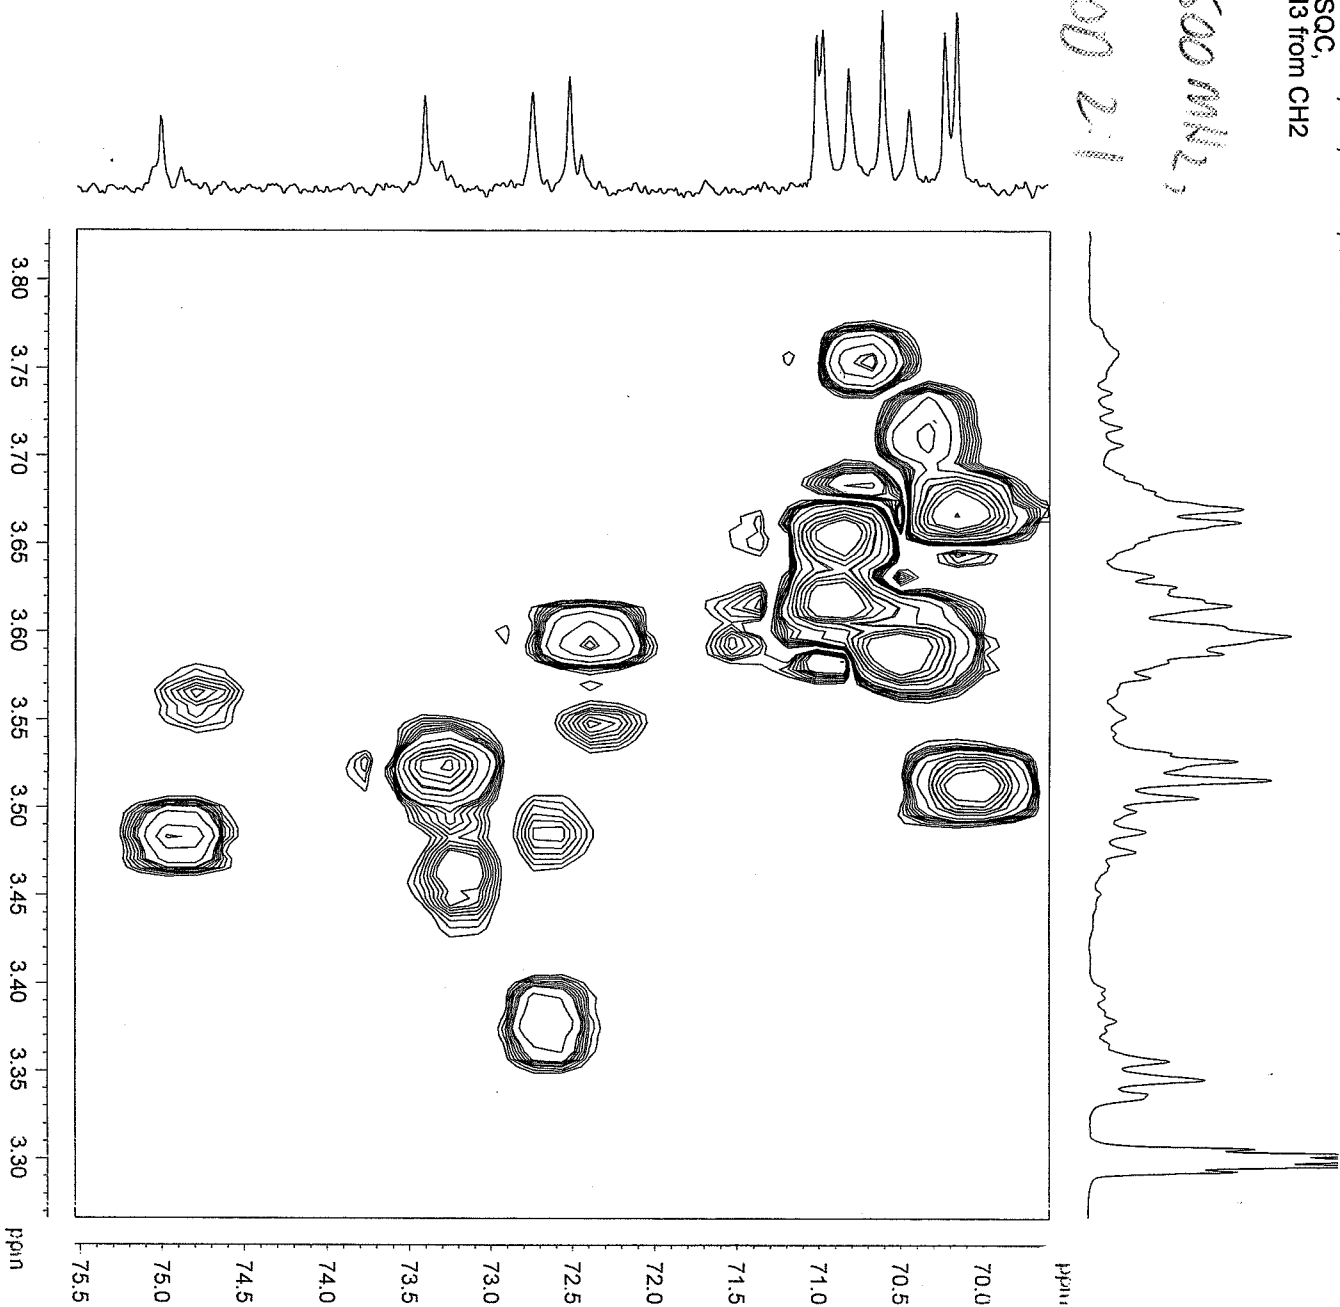

Pete Jarvis, d4-MeOH :CDCl3, 1:2, +27C, dtx500  
Epimer B, Gradient HSQC,  
with editing of CH, CH3 from CH2

(S)-10, 500 MHz  
COU3/CO300 2:1

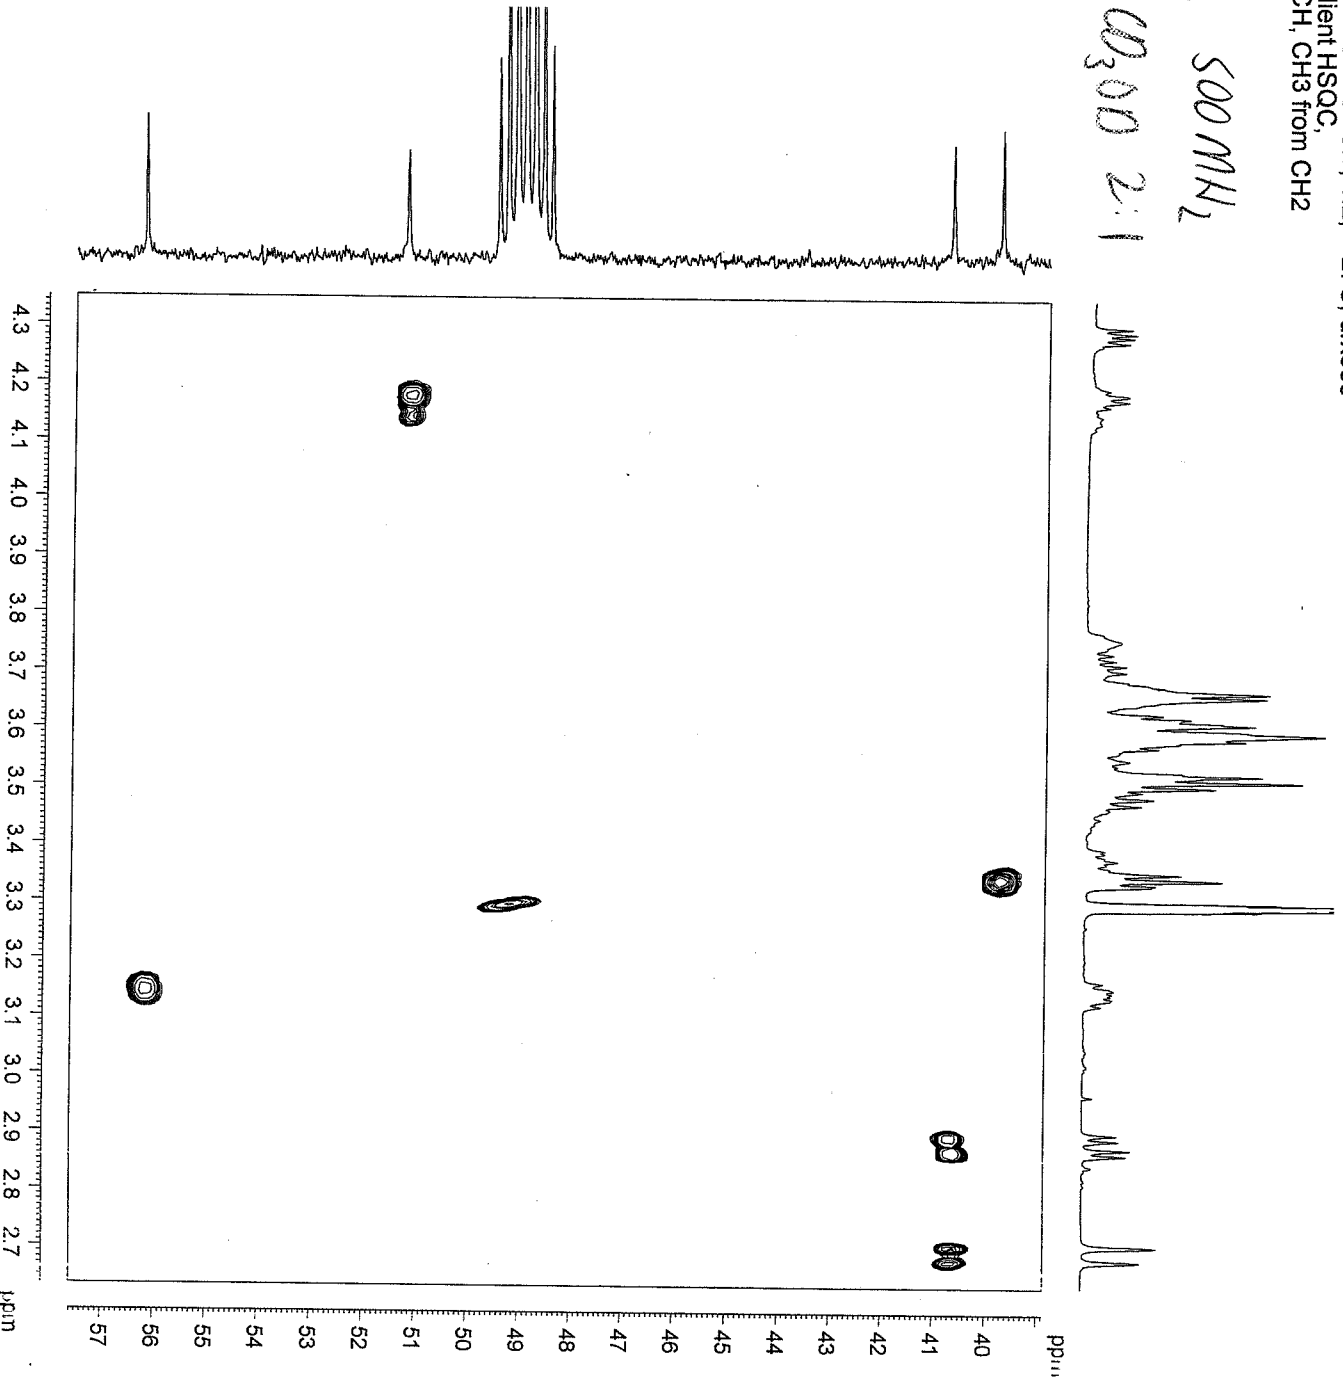

Pete Jarvis, d4-MeOH:CDCl3, 1:2, +27C, dx500  
Eplimer B, Gradient HSQC,  
with editing of CH, CH3 from CH2

(S)-10, 500 MHz,  
CQV3/0300 2:1

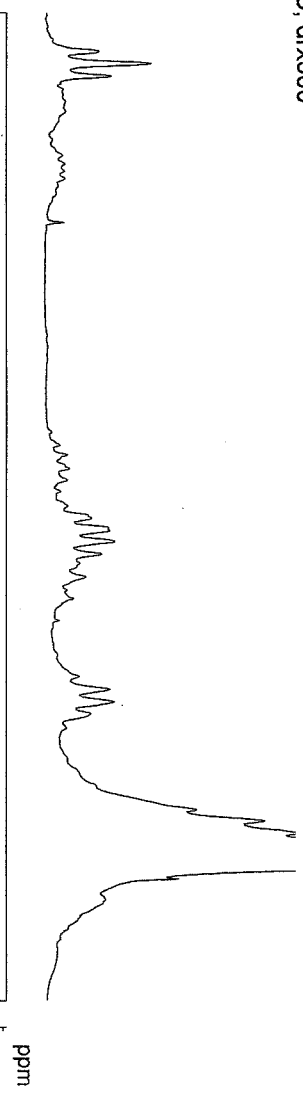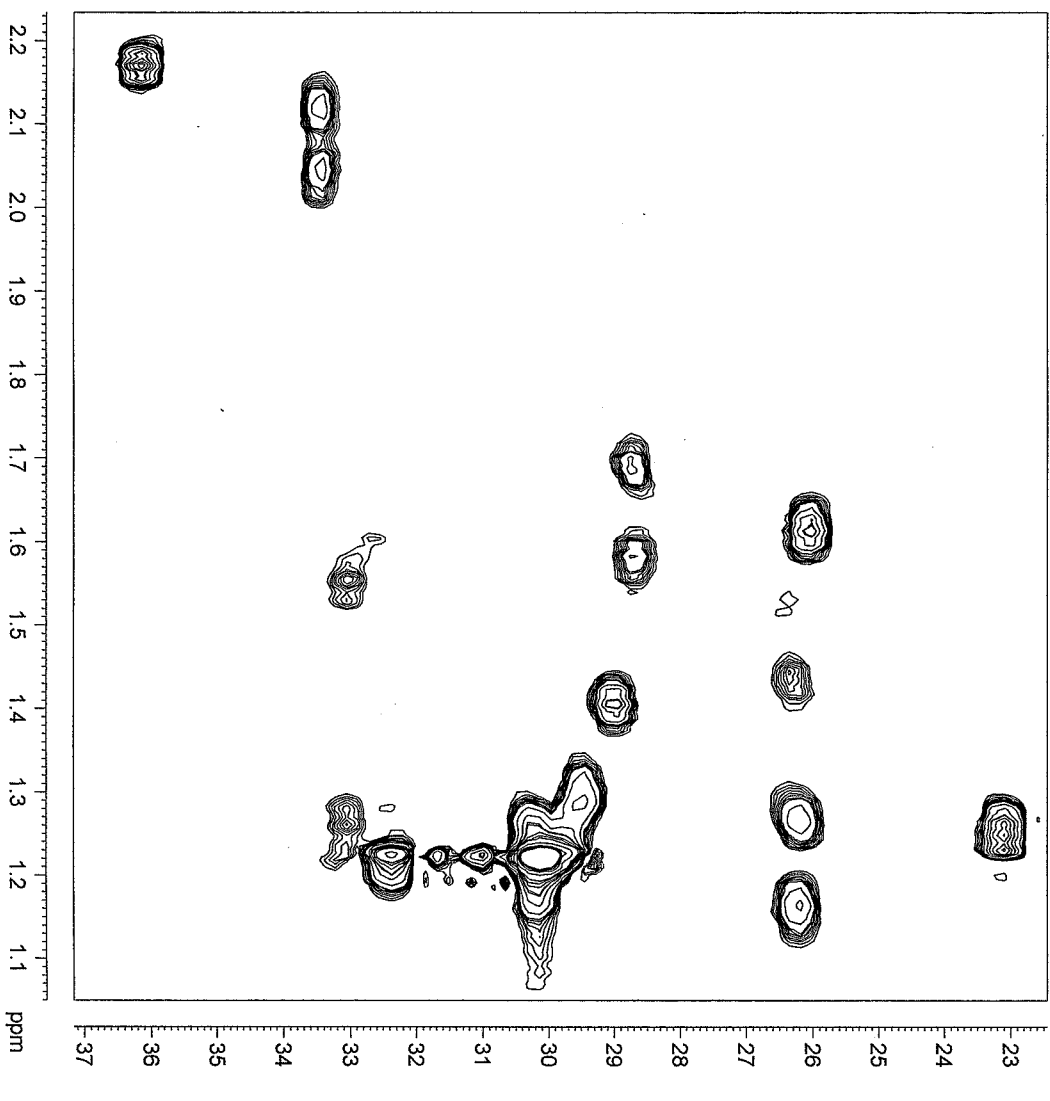

Pete Jarvis, d4-MeOH:CDCl3, 1:2, +27C, dtx500  
 Epimer B, Gradient HMBc  
 run phase sensitive (in F1 only), echo-antiecho,  
 with adiabatic refocussing pulses and a three-fold low-pass  $\beta$ -filter

(S)-10, 500 MHz  
 003100300 2.1

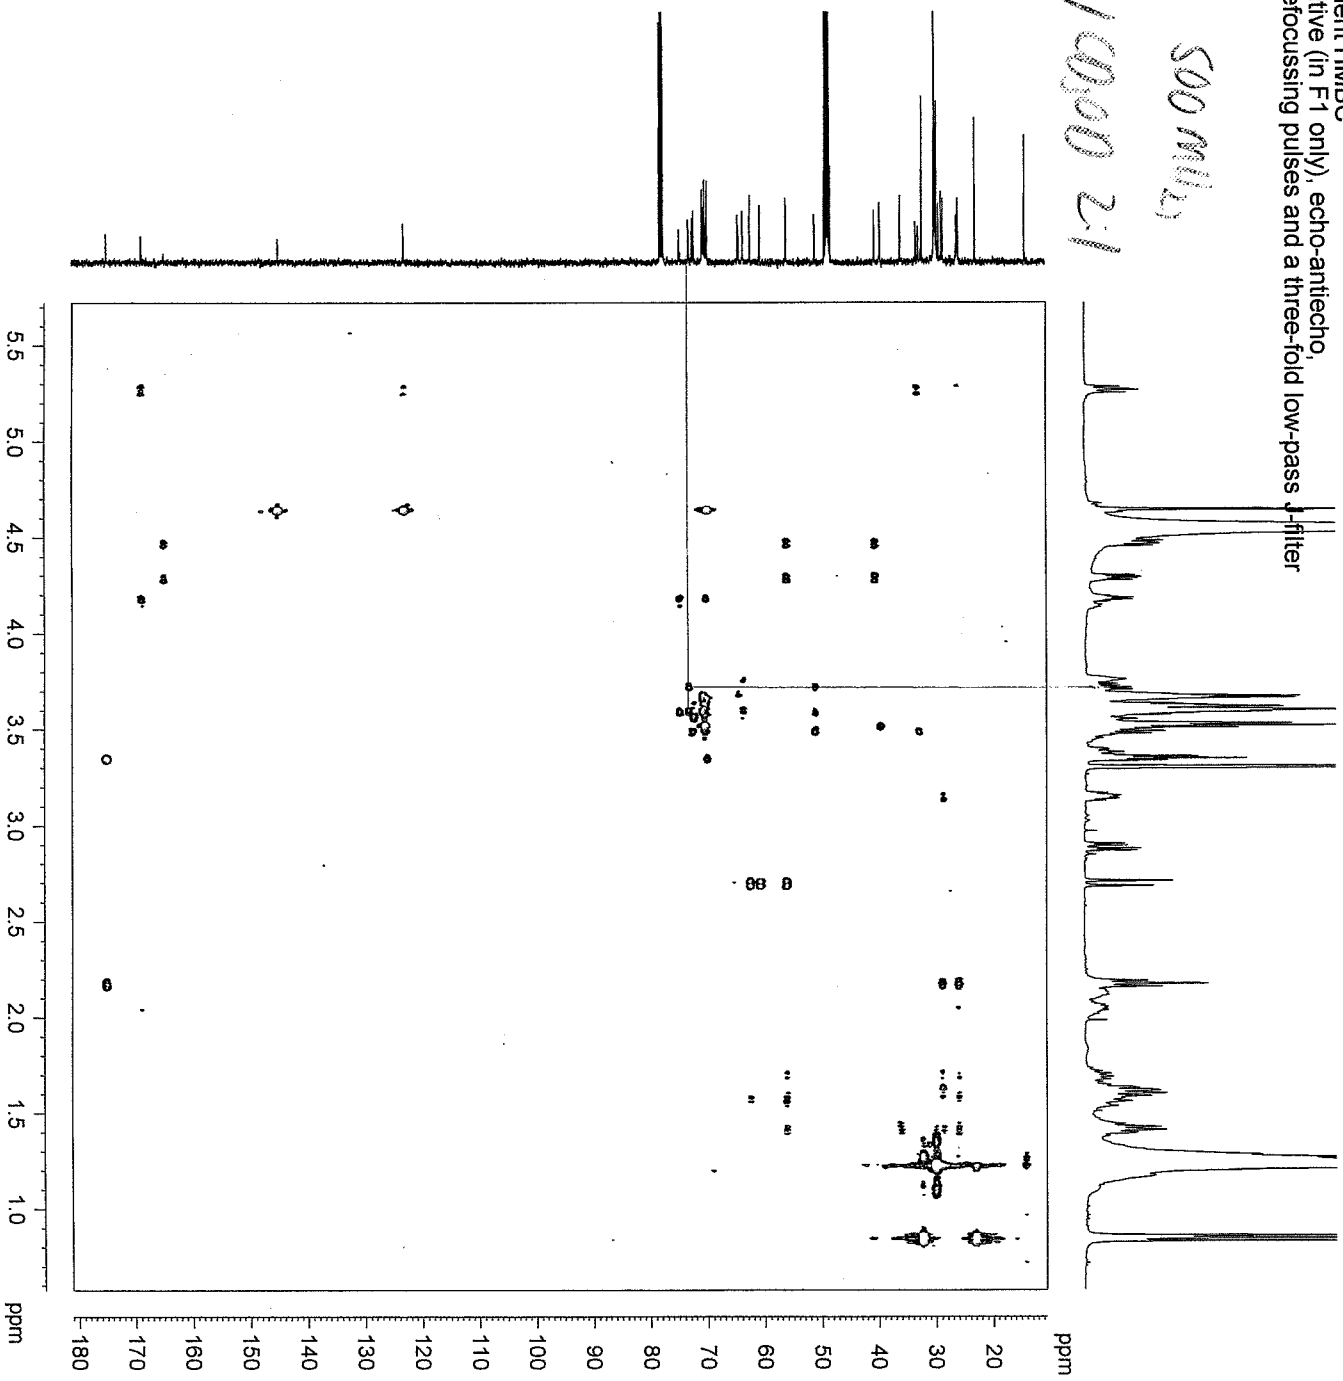

Current Data Parameters  
 NAME ap04g1d  
 EXPNO 3  
 PROCNO 1

F2 - Acquisition Parameters  
 Date\_ 20110404  
 Time 14:54:50  
 INSTRUM dr500  
 NS/RUN 5  
 PULPROG zgpg30  
 TD 2048  
 SOLVENT MeOD  
 NS 8  
 DS 16  
 SWH 4464.286 Hz  
 FIDRES 2.179827 Hz  
 AQ 0.2294250 sec  
 RG 32768  
 DW 112.000 usec  
 DE 6.00 usec  
 TE 300.0 K  
 CNSTG 120.0000000  
 CNST1 160.0000000  
 CNST2 160.0000000  
 CNST3 0.5881140  
 CNST30 0.000000000  
 d0 0.000000000 sec  
 d1 2.000000000 sec  
 d6 0.100000000 sec  
 d16 0.000100000 sec  
 DELTA1 0.00297166 sec  
 DELTA2 0.00247143 sec  
 DELTA3 0.002090665 sec  
 DELTA4 0.09889600 sec  
 DELTA5 0.00003040 sec  
 INO 0.00001785 sec  
 STCNT 256

==== CHANNEL f1 =====  
 NUC1 1H  
 P1 12.20 usec  
 P2 24.40 usec  
 PL1 1.00 dB  
 SFO1 500.1320450 MHz

==== CHANNEL f2 =====  
 NUC2 13C  
 P3 11.00 usec  
 P4 2000.00 usec  
 PL2 -2.00 dB  
 SFO2 125.7707920 MHz  
 SP7 6.33 dB  
 SPMAM7 Cpr60comp, 4  
 SPCAL7 0.500  
 SPOFFS7 0.000 Hz

==== GRADIENT CHANNEL =====  
 GPMAM1 SINE:100  
 GPMAM2 SINE:100  
 GPMAM3 SINE:100  
 GPMAM4 SINE:100  
 GPMAM5 SINE:100  
 GPMAM6 SINE:100  
 GPMAM7 SINE:100  
 GPMAM8 SINE:100  
 GPZ1 90.00 %  
 GPZ2 14.00 %  
 GPZ3 -8.00 %  
 GPZ4 -4.00 %  
 GPZ5 -2.00 %  
 GPZ6 -2.00 %  
 P16 1000.00 usec

F1 - Acquisition parameters  
 NDO 2  
 TD 512  
 SFO1 125.7708 MHz  
 SFO2 500.132045 MHz  
 SW 224.00 ppm  
 FWHZ 224.00 ppm  
 FMODE Echo-antiecho  
 F2 - Processing parameters  
 SI 2048  
 SF 500.1300164 MHz  
 WDW Q  
 SSB 2  
 LB 0.00 Hz  
 GB 0  
 PC 1.40

F1 - Processing parameters  
 SI 1024  
 MC2 echo-antiecho  
 SF 125.757042 MHz  
 WDW Q  
 SSB 2  
 LB 0.00 Hz  
 GB 0

Pete Jarvis, d4-MeOH : CDCl<sub>3</sub>, 1:2, +27°C, dx500  
Epimer B, Gradient HMBG  
run phase sensitive (in F1 only), echo-antiecho,  
with adiabatic refocusing pulses and a three-fold low-pass J-filter

(S)-10, 500 MHz,  
CDCl<sub>3</sub>/d4-MeOH 2:1

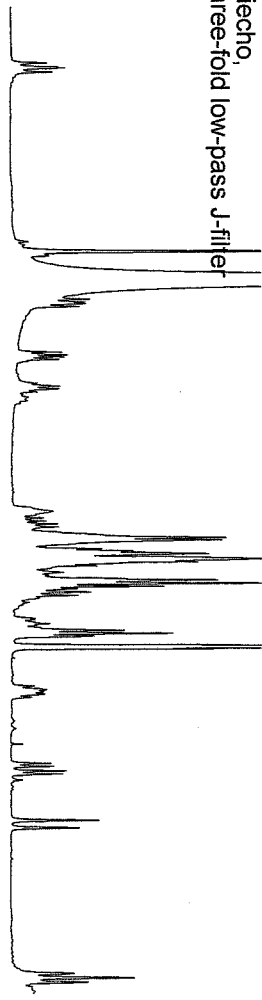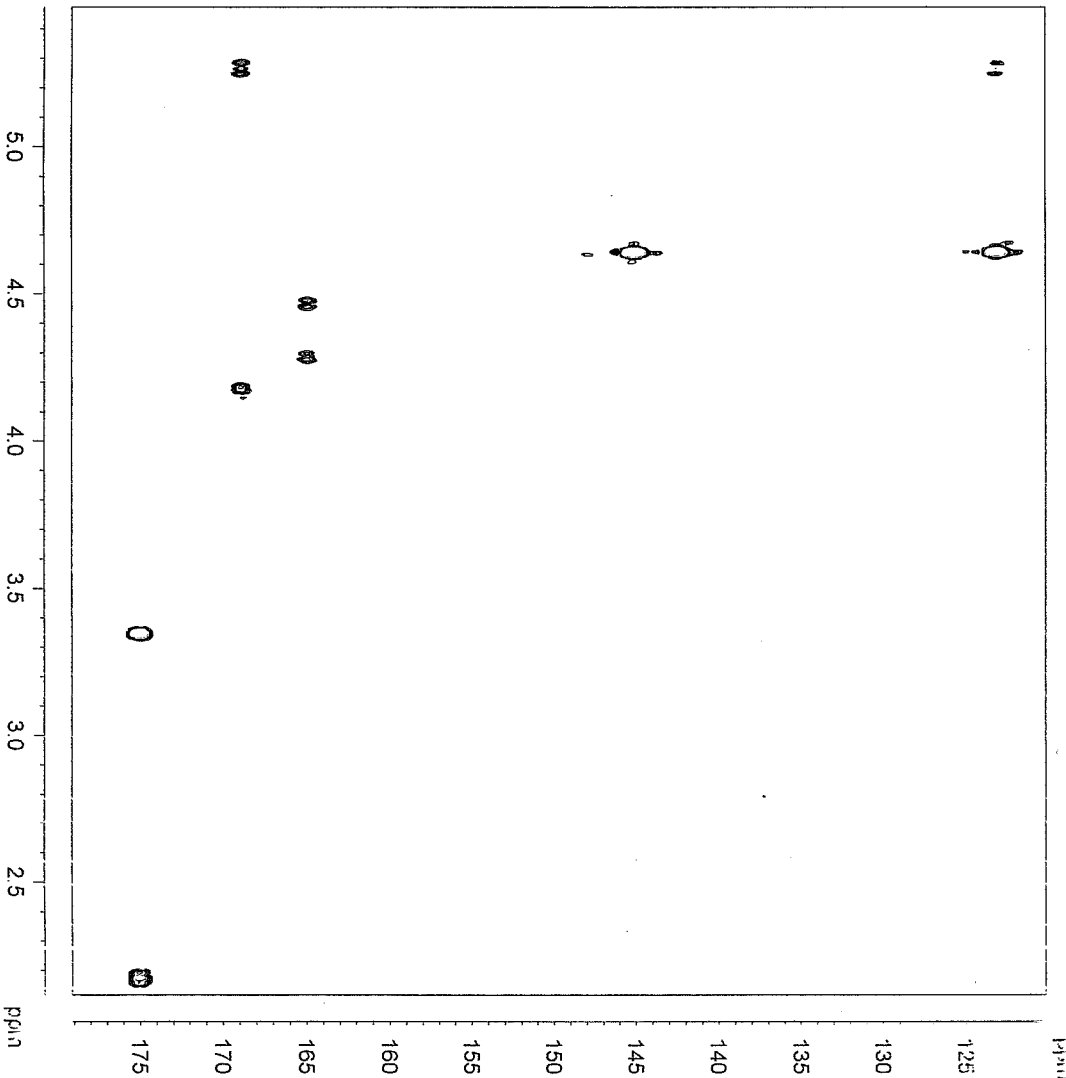

Pete Jervis, d4-MeOH:CDCl3, 1:2, +27C, drx500  
Epimer B, Gradient HMBG  
run phase sensitive (in F1 only), echo-antiecho,  
with adiabatic refocussing pulses and a three-fold low-pass J-filter

(S)-10, 500 MHz,  
003/00300 2.1

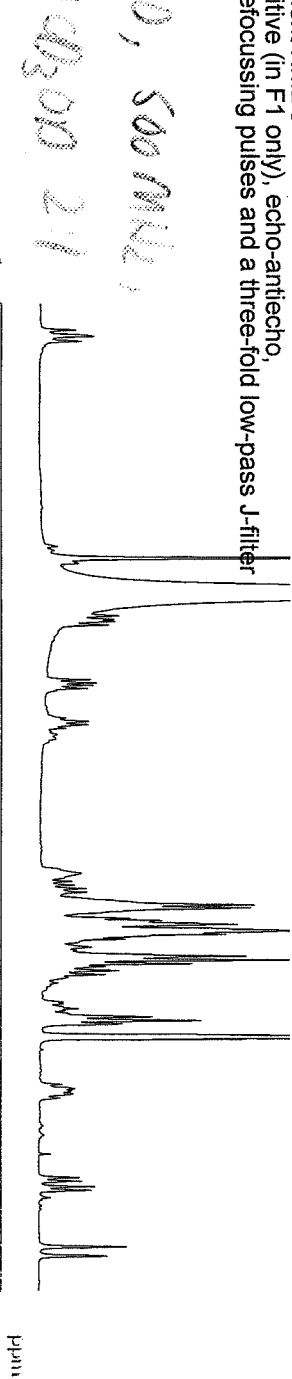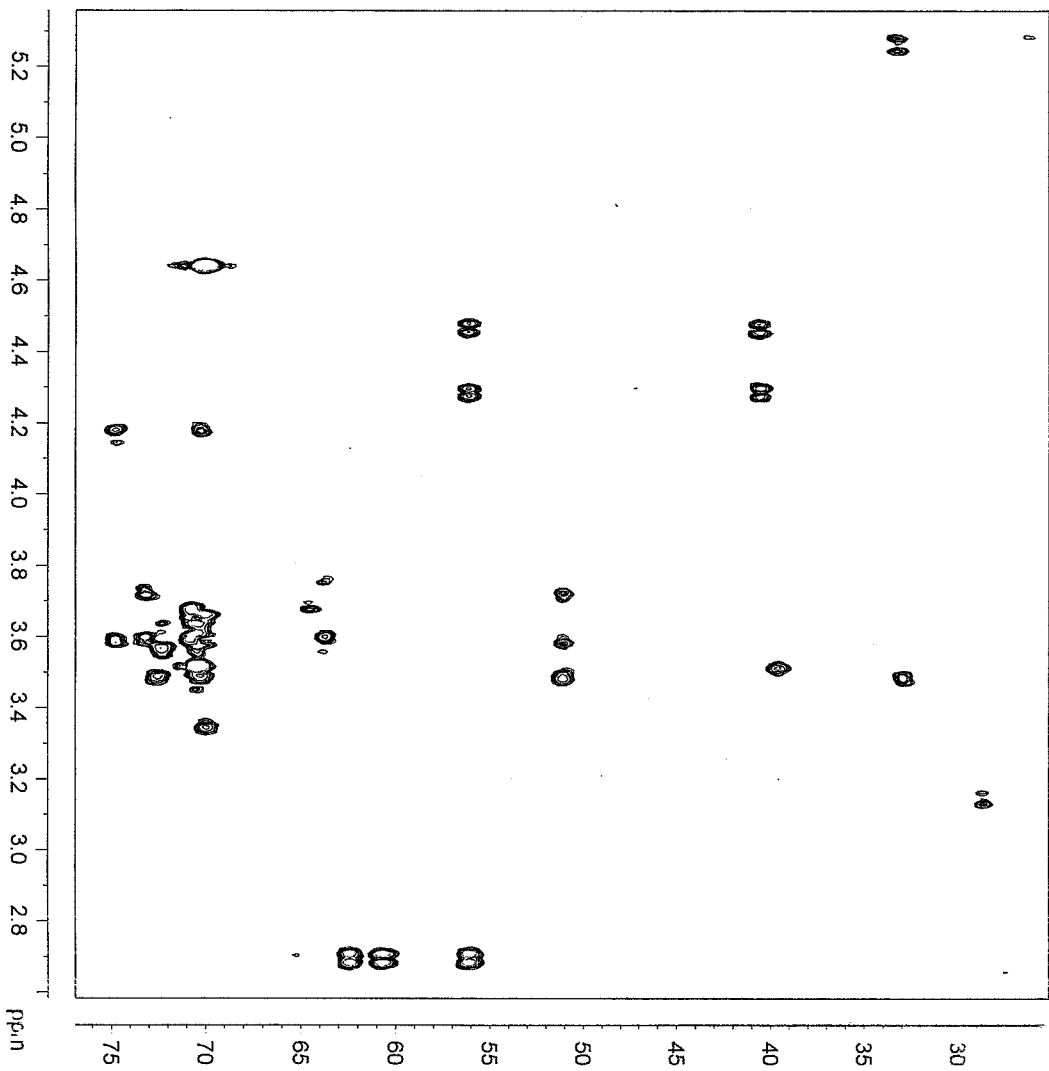



Pete Jervis, d4-MeOH : CDCl<sub>3</sub>, 1:2, +27C, dtx500  
Epimer B, Gradient HMBBC  
run phase sensitive (in F1 only), echo-antecho,  
with adiabatic refocussing pulses and a threefold low-pass J-filter

(S)-10, 500 MHz  
CDCl<sub>3</sub>/d4-MeOH 2:1

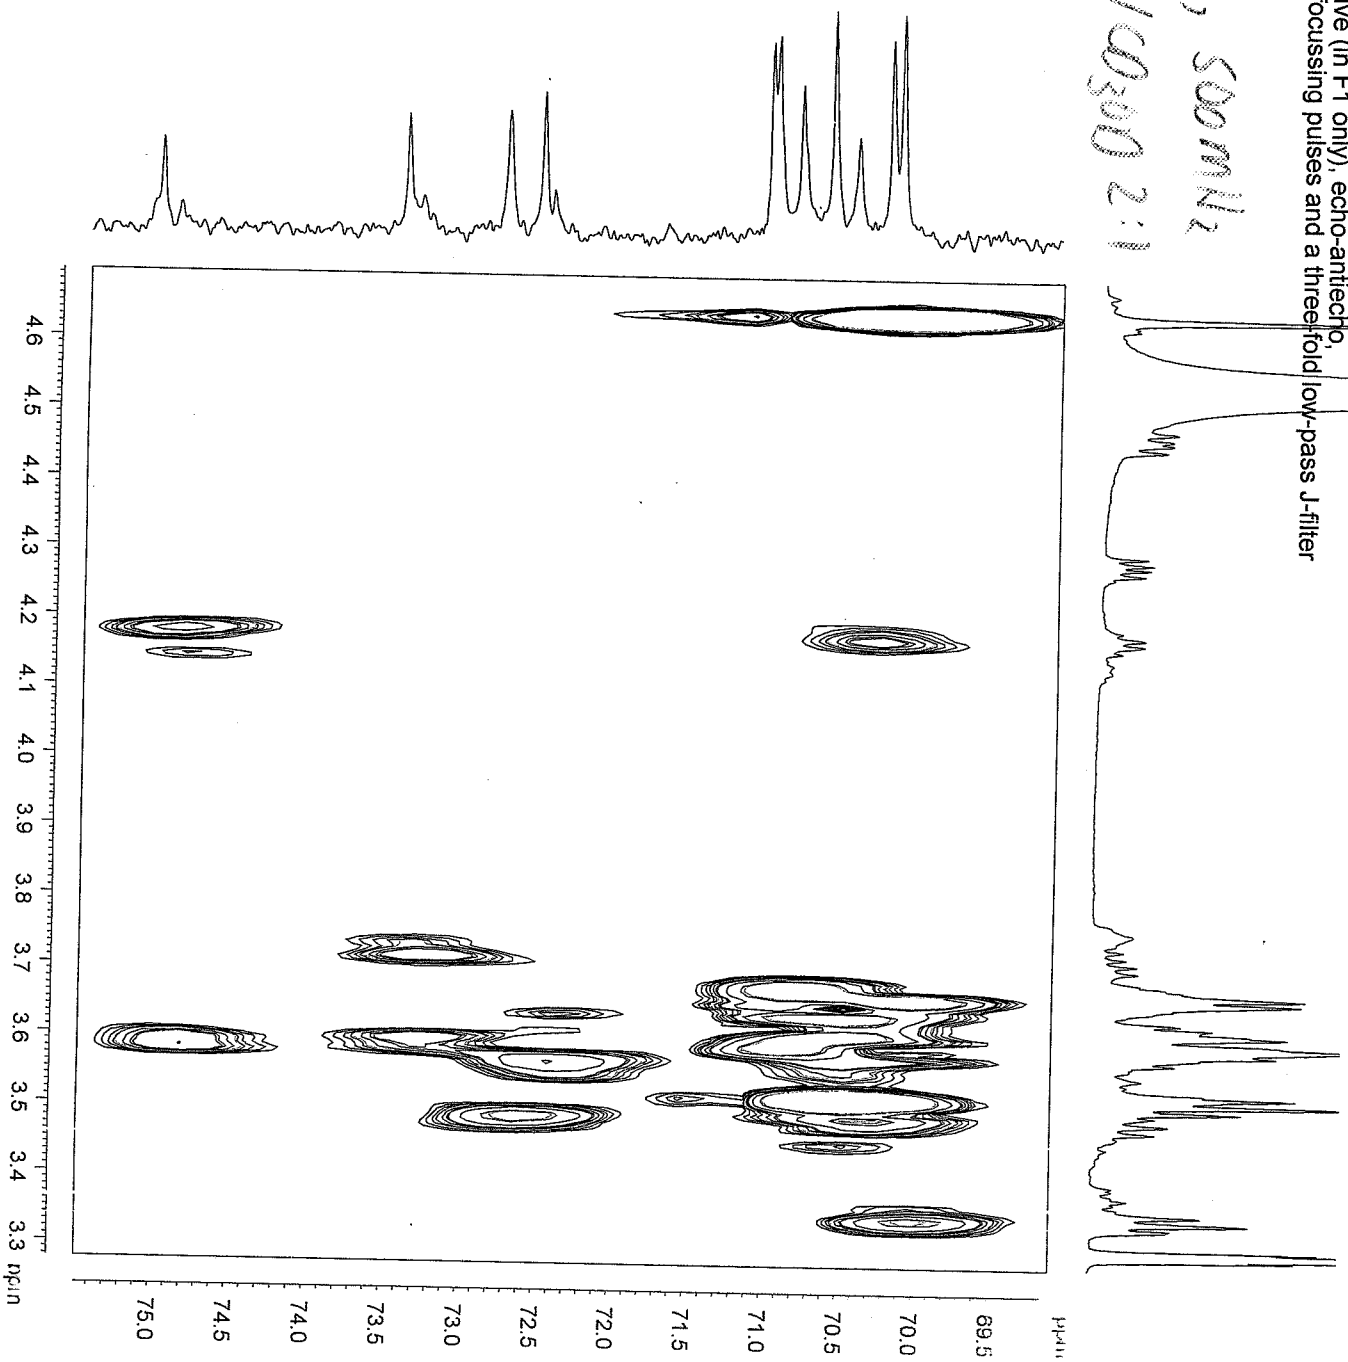

Pete Jarvis, d4-MeOH : CDCl3, 1:2, +27C, dpx500  
Epimer B, Gradient HMBC  
run phase sensitive (in F1 only), echo-antiecho,  
with adiabatic refocussing pulses and a three-fold low-pass J-filter

(S)-10, 500 MHz  
CDCl3 / CD3OD 2:1

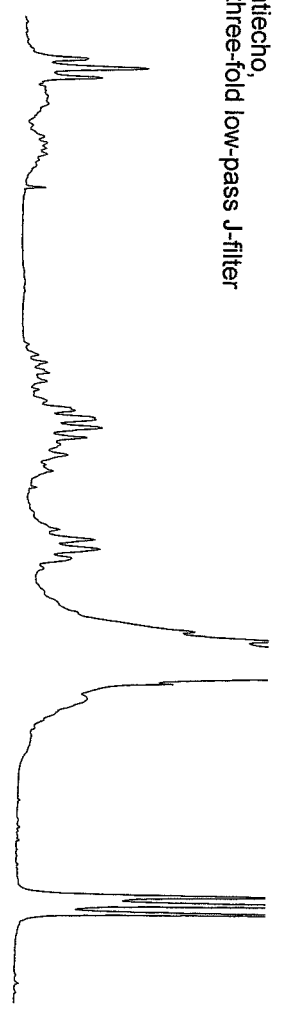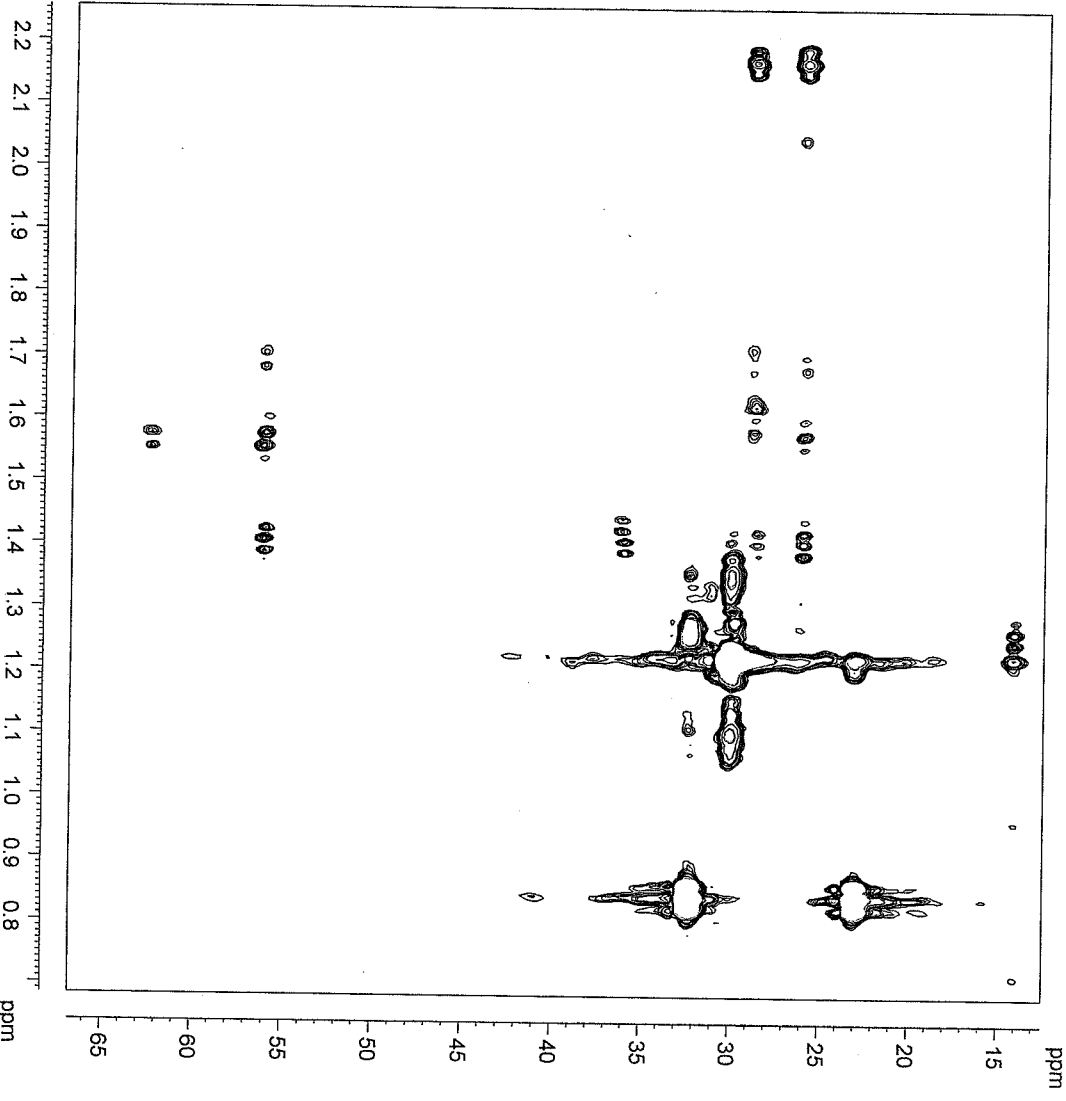

<sup>13</sup>C NMR COMPARISON OF INDIVIDUAL EPIMERS OF 10 WITH EPIMERIC MIXTURE

(S)-10

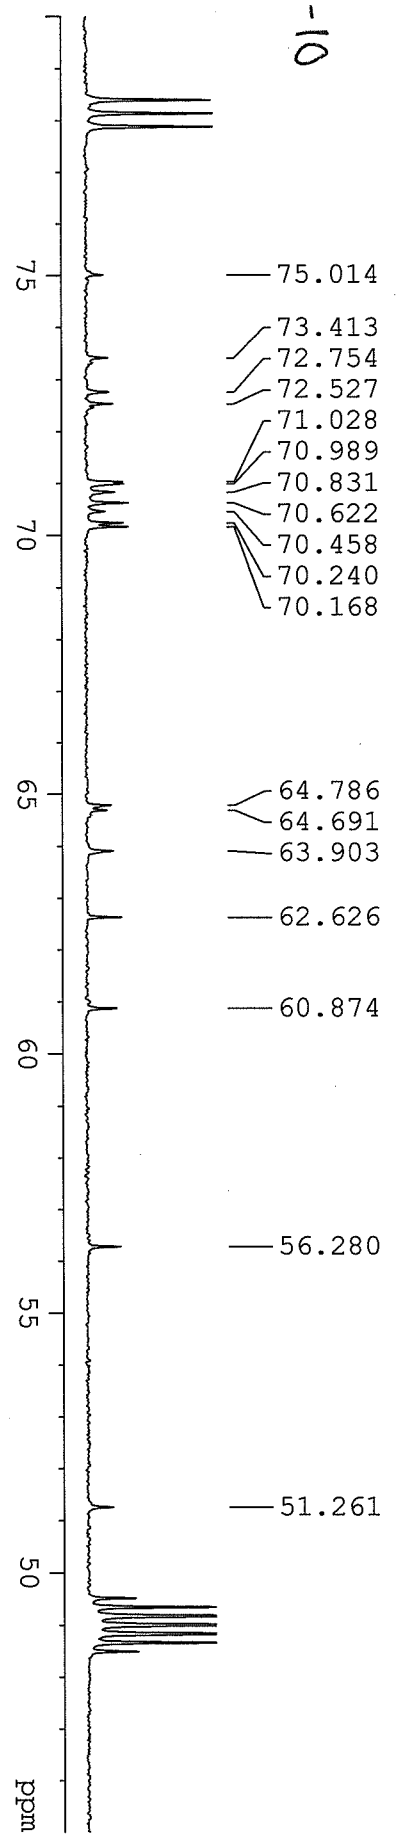

(R/S)-10

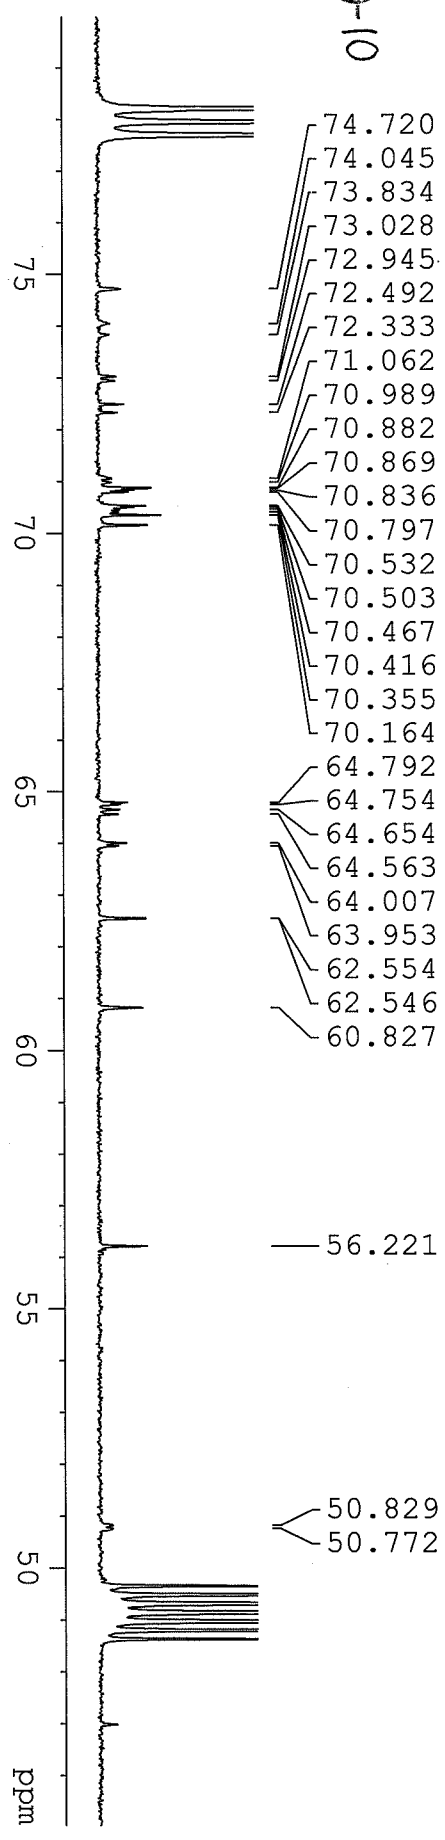

(R)-10

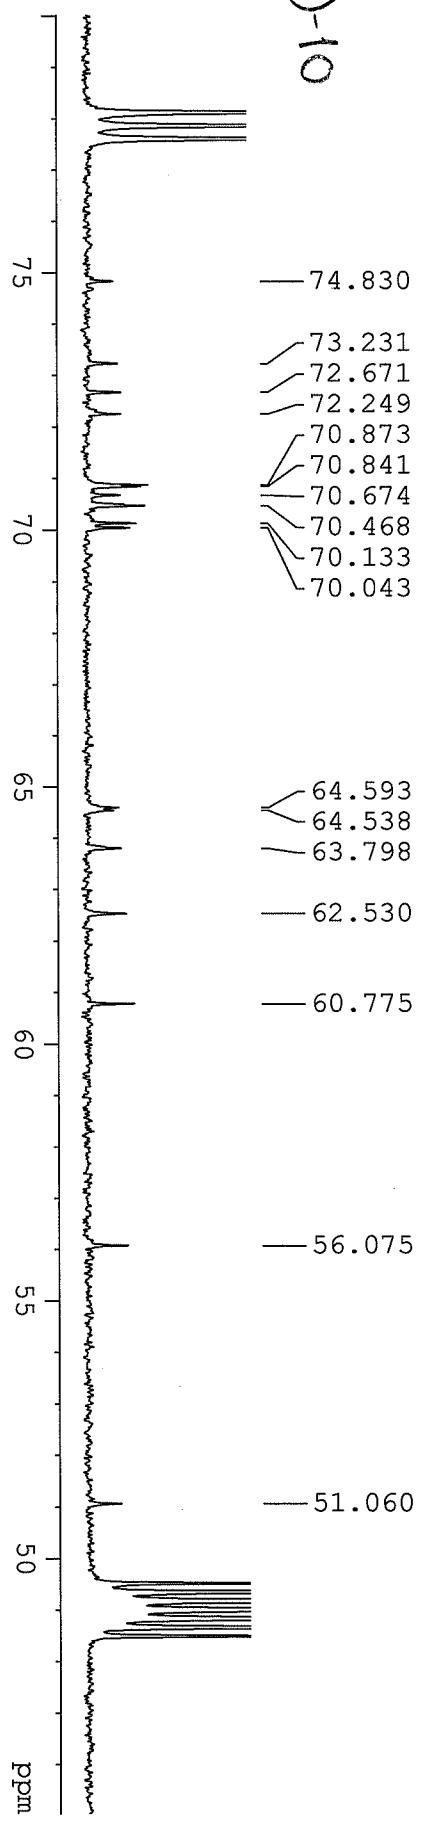



(S)-10

**Elemental Composition Report Peter Jervis PJJ-Epimer B**

**Single Mass Analysis**

Tolerance = 10.0 PPM / DBE: min = -1.5, max = 99.0

Selected filters: None

**Monoisotopic Mass, Even Electron Ions**

94 formula(e) evaluated with 1 results within limits (all results (up to 1000) for each mass)

| Minimum:         |            |     |      | -1.5 |                      |
|------------------|------------|-----|------|------|----------------------|
| Maximum:         |            | 5.0 | 10.0 | 99.0 |                      |
| Mass             | Calc. Mass | mDa | PPM  | DBE  | Formula              |
| <b>1276.9166</b> | 1276.9161  | 0.5 | 0.4  | 7.5  | C67 H127 N7 O12 Na S |
